# Supplementary material for: Effects of crude oil on survival and development in embryonated eggs in Callinectes sapidus Rathbun, 1896 (Decapoda, Portunidae)
Source: PeerJ. 2018 Dec 11;6:e5985. doi: 10.7717/peerj.5985 (PMC6294050; doi:10.7717/peerj.5985)
Supplement: Supplemental Information 1 — Metadata tab provides an explanation for each column used in the dataset. [file peerj-06-5985-s001.xlsx]

## Sheet: Replicate 1
Date	Replicate #	Day	Plate ID	Well ID	Stage	Cloudy/Dark	Heart beat	Dorsal Spine	Eyes (Full & Bilaterally symmetrical)	Rostrum	Telson	Swimming ablility	Lateral Spines			Date	Replicate #	Day	Plate ID	Well ID	Stage	Cloudy/Dark	Heart beat	Dorsal Spine	Eyes (Full & Bilaterally symmetrical)	Rostrum	Telson	Swimming ablility	Lateral Spines
2015-06-07	1	1	Cont3	A1	7	-	-	-	Y	-	-	-	-	-		2015-06-07	1	1	Ex3	A1	7	-	-	-	Y	-	-	-	-
2015-06-07	1	1	Cont3	B1	7	-	-	-	Y	-	-	-	-	-		2015-06-07	1	1	EX3	B1	7	-	-	-	Y	-	-	-	-
2015-06-07	1	1	Cont3	C1	7	-	-	-	Y	-	-	-	-	-		2015-06-07	1	1	Ex3	C1	7	-	-	-	Y	-	-	-	-
2015-06-07	1	1	Cont3	D1	7	-	-	-	Y	-	-	-	-	-		2015-06-07	1	1	Ex3	D1	7	-	-	-	Y	-	-	-	-
2015-06-07	1	1	Cont3	E1	7	-	-	-	Y	-	-	-	-	-		2015-06-07	1	1	Ex3	E1	6	Y	-	-	-	-	-	-	-
2015-06-07	1	1	Cont3	F1	7	Y	-	-	-	-	-	-	-	-		2015-06-07	1	1	Ex3	F1	7	-	-	-	Y	-	-	-	-
2015-06-07	1	1	Cont3	G1	7	-	-	-	Y	-	-	-	-	-		2015-06-07	1	1	Ex3	G1	7	-	-	-	Y	-	-	-	-
2015-06-07	1	1	Cont3	H1	7	-	-	-	Y	-	-	-	-	-		2015-06-07	1	1	Ex3	H1	7	Y	-	-	-	-	-	-	-
2015-06-07	1	1	Cont3	A2	7	-	-	-	Y	-	-	-	-	-		2015-06-07	1	1	Ex3	A2	7	-	-	-	Y	-	-	-	-
2015-06-07	1	1	Cont3	B2	7	-	-	-	Y	-	-	-	-	-		2015-06-07	1	1	Ex3	B2	7	-	-	-	Y	-	-	-	-
2015-06-07	1	1	Cont3	C2	7	-	-	-	Y	-	-	-	-	-		2015-06-07	1	1	Ex3	C2	7	-	-	-	Y	-	-	-	-
2015-06-07	1	1	Cont3	D2	7	-	-	-	Y	-	-	-	-	-		2015-06-07	1	1	Ex3	D2	7	Y	-	-	-	-	-	-	-
2015-06-07	1	1	Cont3	E2	6	Y	-	-	-	-	-	-	-	-		2015-06-07	1	1	Ex3	E2	7	-	-	-	Y	-	-	-	-
2015-06-07	1	1	Cont3	F2	7	-	-	-	Y	-	-	-	-	-		2015-06-07	1	1	Ex3	F2	6	Y	-	-	-	-	-	-	-
2015-06-07	1	1	Cont3	G2	7	-	-	-	Y	-	-	-	-	-		2015-06-07	1	1	Ex3	G2	7	-	-	-	Y	-	-	-	-
2015-06-07	1	1	Cont3	H2	7	-	-	-	Y	-	-	-	-	-		2015-06-07	1	1	Ex3	H2	7	-	-	-	Y	-	-	-	-
2015-06-07	1	1	Cont3	A3	7	-	-	-	Y	-	-	-	-	-		2015-06-07	1	1	Ex3	A3	7	-	-	-	Y	-	-	-	-
2015-06-07	1	1	Cont3	B3	7	-	-	-	Y	-	-	-	-	-		2015-06-07	1	1	Ex3	B3	6	Y	-	-	-	-	-	-	-
2015-06-07	1	1	Cont3	C3	7	-	-	-	Y	-	-	-	-	-		2015-06-07	1	1	Ex3	C3	7	-	-	-	Y	-	-	-	-
2015-06-07	1	1	Cont3	D3	7	-	-	-	Y	-	-	-	-	-		2015-06-07	1	1	Ex3	D3	7	-	-	-	Y	-	-	-	-
2015-06-07	1	1	Cont3	E3	MISSING	-										2015-06-07	1	1	Ex3	E3	7	-	-	-	Y	-	-	-	-
2015-06-07	1	1	Cont3	F3	7	-	-	-	Y	-	-	-	-	-		2015-06-07	1	1	Ex3	F3	7	-	-	-	Y	-	-	-	-
2015-06-07	1	1	Cont3	G3	7	-	-	-	Y	-	-	-	-	-		2015-06-07	1	1	Ex3	G3	7	-	-	-	Y	-	-	-	-
2015-06-07	1	1	Cont3	H3	7	-	-	-	Y	-	-	-	-	-		2015-06-07	1	1	Ex3	H3	7	-	-	-	Y	-	-	-	-
2015-06-07	1	1	Cont3	A4	7	-	-	-	Y	-	-	-	-	-		2015-06-07	1	1	Ex3	A4	7	-	-	-	Y	-	-	-	-
2015-06-07	1	1	Cont3	B4	7	-	-	-	Y	-	-	-	-	-		2015-06-07	1	1	Ex3	B4	7	-	-	-	Y	-	-	-	-
2015-06-07	1	1	Cont3	C4	7	-	-	-	Y	-	-	-	-	-		2015-06-07	1	1	Ex3	C4	7	-	-	-	Y	-	-	-	-
2015-06-07	1	1	Cont3	D4	7	-	-	-	Y	-	-	-	-	-		2015-06-07	1	1	Ex3	D4	7	-	-	-	Y	-	-	-	-
2015-06-07	1	1	Cont3	E4	7	-	-	-	Y	-	-	-	-	-		2015-06-07	1	1	Ex3	E4	6	Y	-	-	-	-	-	-	-
2015-06-07	1	1	Cont3	F4	MISSING	-	-	-	-	-	-	-	-	-		2015-06-07	1	1	Ex3	F4	7	-	-	-	Y	-	-	-	-
2015-06-07	1	1	Cont3	G4	7	-	-	-	Y	-	-	-	-	-		2015-06-07	1	1	Ex3	G4	7	-	-	-	Y	-	-	-	-
2015-06-07	1	1	Cont3	H4	7	-	-	-	Y	-	-	-	-	-		2015-06-07	1	1	Ex3	H4	7	-	-	-	Y	-	-	-	-
2015-06-07	1	1	Cont3	A5	7	Y	-	-	-	-	-	-	-	-		2015-06-07	1	1	Ex3	A5	7	-	-	-	Y	-	-	-	-
2015-06-07	1	1	Cont3	B5	7	-	-	-	Y	-	-	-	-	-		2015-06-07	1	1	Ex3	B5	7	-	-	-	Y	-	-	-	-
2015-06-07	1	1	Cont3	C5	7	-	-	-	Y	-	-	-	-	-		2015-06-07	1	1	Ex3	C5	7	-	-	-	Y	-	-	-	-
2015-06-07	1	1	Cont3	D5	7	-	-	-	Y	-	-	-	-	-		2015-06-07	1	1	Ex3	D5	7	-	-	-	Y	-	-	-	-
2015-06-07	1	1	Cont3	E5	6	Y	-	-	-	-	-	-	-	-		2015-06-07	1	1	Ex3	E5	7	-	-	-	Y	-	-	-	-
2015-06-07	1	1	Cont3	F5	7	-	-	-	Y	-	-	-	-	-		2015-06-07	1	1	Ex3	F5	7	-	-	-	Y	-	-	-	-
2015-06-07	1	1	Cont3	G5	7	-	-	-	Y	-	-	-	-	-		2015-06-07	1	1	Ex3	G5	7	-	-	-	Y	-	-	-	-
2015-06-07	1	1	Cont3	H5	7	-	-	-	Y	-	-	-	-	-		2015-06-07	1	1	Ex3	H5	7	-	-	-	Y	-	-	-	-
2015-06-07	1	1	Cont3	A6	7	-	-	-	Y	-	-	-	-	-		2015-06-07	1	1	Ex3	A6	7	-	-	-	Y	-	-	-	-
2015-06-07	1	1	Cont3	B6	7	-	-	-	Y	-	-	-	-	-		2015-06-07	1	1	Ex3	B6	7	-	-	-	Y	-	-	-	-
2015-06-07	1	1	Cont3	C6	7	-	-	-	Y	-	-	-	-	-		2015-06-07	1	1	Ex3	C6	7	-	-	-	Y	-	-	-	-
2015-06-07	1	1	Cont3	D6	7	-	-	-	Y	-	-	-	-	-		2015-06-07	1	1	Ex3	D6	7	-	-	-	Y	-	-	-	-
2015-06-07	1	1	Cont3	E6	7	-	-	-	Y	-	-	-	-	-		2015-06-07	1	1	Ex3	E6	7	-	-	-	Y	-	-	-	-
2015-06-07	1	1	Cont3	F6	7	-	-	-	Y	-	-	-	-	-		2015-06-07	1	1	Ex3	F6	7	-	-	-	Y	-	-	-	-
2015-06-07	1	1	Cont3	G6	7	-	-	-	Y	-	-	-	-	-		2015-06-07	1	1	Ex3	G6	6	Y	-	-	-	-	-	-	-
2015-06-08	1	1	Cont3	H6	7	-	-	-	Y	-	-	-	-	-		2015-06-07	1	1	Ex3	H6	7	-	-	-	Y	-	-	-	-
2015-06-08	1	2	Cont4	A1	9	-	Y	-	Y	-	-	-	-	-		2015-06-08	1	1	EX4	A1	8	Y	-	-	-	-	-	-	-
2015-06-08	1	2	Cont4	B1	7	Y	-	-	-	-	-	-	-	-		2015-06-08	1	2	EX4	B1	9	-	Y	-	Y	-	-	-	-
2015-06-08	1	2	Cont4	C1	7	Y	-	-	-	-	-	-	-	-		2015-06-08	1	2	EX4	C1	6	Y	-	-	-	-	-	-	-
2015-06-08	1	2	Cont4	D1	9	-	Y	-	Y	-	-	-	-	-		2015-06-08	1	2	EX4	D1	9	-	Y	-	Y	-	-	-	-
2015-06-08	1	2	Cont4	E1	ZOEA	-	Y	Y	Y	Y	Y	Normal	-	-		2015-06-08	1	2	EX4	E1	ZOEA	-	Y	Y	Y	Y	Y	Normal	-
2015-06-08	1	2	Cont4	F1	9	-	Y	-	Y	-	-	-	-	-		2015-06-08	1	2	EX4	F1	7	Y	-	-	-	-	-	-	-
2015-06-08	1	2	Cont4	G1	9	Y	-	-	-	-	-	-	-	-		2015-06-08	1	2	EX4	G1	6	Y	-	-	-	-	-	-	-
2015-06-08	1	2	Cont4	H1	MISSING	-	-	-	-	-	-	-	-	-		2015-06-08	1	2	EX4	H1	7	Y	-	-	-	-	-	-	-
2015-06-08	1	2	Cont4	A2	9	-	Y	-	Y	-	-	-	-	-		2015-06-08	1	2	EX4	A2	ZOEA	-	Y	Y	Y	Y	Y	Normal	-
2015-06-08	1	2	Cont4	B2	7	Y	-	-	-	-	-	-	-	-		2015-06-08	1	2	EX4	B2	8	Y	-	-	-	-	-	-	-
2015-06-08	1	2	Cont4	C2	7	Y	-	-	-	-	-	-	-	-		2015-06-08	1	2	EX4	C2	9	-	Y	-	Y	-	-	-	-
2015-06-08	1	2	Cont4	D2	6	Y	-	-	-	-	-	-	-	-		2015-06-08	1	2	EX4	D2	7	Y	-	-	-	-	-	-	-
2015-06-08	1	2	Cont4	E2	7	Y	-	-	-	-	-	-	-	-		2015-06-08	1	2	EX4	E2	9	-	Y	-	Y	-	-	-	-
2015-06-08	1	2	Cont4	F2	9	-	Y	-	Y	-	-	-	-	-		2015-06-08	1	2	EX4	F2	ZOEA	-	Y	Y	Y	Y	Y	Normal	-
2015-06-08	1	2	Cont4	G2	9	-	Y	-	Y	-	-	-	-	-		2015-06-08	1	2	EX4	G2	6	Y	-	-	-	-	-	-	-
2015-06-08	1	2	Cont4	H2	9	-	Y	-	Y	-	-	-	-	-		2015-06-08	1	2	EX4	H2	ZOEA	-	Y	Y	Y	Y	Y	Normal	-
2015-06-08	1	2	Cont4	A3	6	Y	-	-	-	-	-	-	-	-		2015-06-08	1	2	EX4	A3	9	-	Y	-	Y	-	-	-	-
2015-06-08	1	2	Cont4	B3	9	-	Y	-	Y	-	-	-	-	-		2015-06-08	1	2	EX4	B3	7	Y	-	-	-	-	-	-	-
2015-06-08	1	2	Cont4	C3	6	Y	-	-	-	-	-	-	-	-		2015-06-08	1	2	EX4	C3	7	Y	-	-	-	-	-	-	-
2015-06-08	1	2	Cont4	D3	9	-	Y	-	Y	-	-	-	-	-		2015-06-08	1	2	EX4	D3	9	-	Y	-	Y	-	-	-	-
2015-06-08	1	2	Cont4	E3	9	-	Y	-	Y	-	-	-	-	-		2015-06-08	1	2	EX4	E3	7	Y	-	-	-	-	-	-	-
2015-06-08	1	2	Cont4	F3	ZOEA	-	Y	Y	Y	Y	Y	Normal	-	-		2015-06-08	1	2	EX4	F3	9	-	Y	-	Y	-	-	-	-
2015-06-08	1	2	Cont4	G3	6	Y	-	-	-	-	-	-	-	-		2015-06-08	1	2	EX4	G3	9	-	Y	-	Y	-	-	-	-
2015-06-08	1	2	Cont4	H3	9	-	Y	-	Y	-	-	-	-	-		2015-06-08	1	2	EX4	H3	MISSING	-	-	-	-	-	-	-	-
2015-06-08	1	2	Cont4	A4	9	-	Y	-	Y	-	-	-	-	-		2015-06-08	1	2	EX4	A4	7	Y	-	-	-	-	-	-	-
2015-06-08	1	2	Cont4	B4	9	-	Y	-	Y	-	-	-	-	-		2015-06-08	1	2	EX4	B4	6	Y	-	-	-	-	-	-	-
2015-06-08	1	2	Cont4	C4	9	-	Y	-	Y	-	-	-	-	-		2015-06-08	1	2	EX4	C4	9	-	Y	-	Y	-	-	-	-
2015-06-08	1	2	Cont4	D4	8	Y	-	-	-	-	-	-	-	-		2015-06-08	1	2	EX4	D4	7	Y	-	-	-	-	-	-	-
2015-06-08	1	2	Cont4	E4	6	Y	-	-	-	-	-	-	-	-		2015-06-08	1	2	EX4	E4	9	-	Y	-	Y	-	-	-	-
2015-06-08	1	2	Cont4	F4	9	-	Y	-	Y	-	-	-	-	-		2015-06-08	1	2	EX4	F4	9	-	Y	-	Y	-	-	-	-
2015-06-08	1	2	Cont4	G4	9	-	Y	-	Y	-	-	-	-	-		2015-06-08	1	2	EX4	G4	-	-	-	-	UNDETERMINED	-	-	-	-
2015-06-08	1	2	Cont4	H4	7	Y	-	-	-	-	-	-	-	-		2015-06-08	1	2	EX4	H4	7	Y	-	-	-	-	-	-	-
2015-06-08	1	2	Cont4	A5	6	Y	-	-	-	-	-	-	-	-		2015-06-08	1	2	EX4	A5	7	Y	-	-	-	-	-	-	-
2015-06-08	1	2	Cont4	B5	9	-	Y	-	Y	-	-	-	-	-		2015-06-08	1	2	EX4	B5	6	Y	-	-	-	-	-	-	-
2015-06-08	1	2	Cont4	C5	9	-	Y	-	Y	-	-	-	-	-		2015-06-08	1	2	EX4	C5	9	-	Y	-	Y	-	-	-	-
2015-06-08	1	2	Cont4	D5	7	Y	-	-	-	-	-	-	-	-		2015-06-08	1	2	EX4	D5	9	-	Y	-	Y	-	-	-	-
2015-06-08	1	2	Cont4	E5	6	Y	-	-	-	-	-	-	-	-		2015-06-08	1	2	EX4	E5	9	-	Y	-	Y	-	-	-	-
2015-06-08	1	2	Cont4	F5	6	Y	-	-	-	-	-	-	-	-		2015-06-08	1	2	EX4	F5	7	Y	-	-	-	-	-	-	-
2015-06-08	1	2	Cont4	G5	9	-	Y	-	Y	-	-	-	-	-		2015-06-08	1	2	EX4	G5	7	Y	-	-	-	-	-	-	-
2015-06-08	1	2	Cont4	H5	ZOEA	-	Y	Y	Y	Y	Y	Normal	-	-		2015-06-08	1	2	EX4	H5	7	Y	-	-	-	-	-	-	-
2015-06-08	1	2	Cont4	A6	7	Y	-	-	-	-	-	-	-	-		2015-06-08	1	2	EX4	A6	9	-	Y	-	Y	-	-	-	-
2015-06-08	1	2	Cont4	B6	MISSING	-	-	-	-	-	-	-	-	-		2015-06-08	1	2	EX4	B6	9	-	Y	-	Y	-	-	-	-
2015-06-08	1	2	Cont4	C6	8	Y	-	-	-	-	-	-	-	-		2015-06-08	1	2	EX4	C6	9	Y	-	-	-	-	-	-	-
2015-06-08	1	2	Cont4	D6	8	Y	-	-	-	-	-	-	-	-		2015-06-08	1	2	EX4	D6	7	Y	-	-	-	-	-	-	-
2015-06-08	1	2	Cont4	E6	7	Y	-	-	-	-	-	-	-	-		2015-06-08	1	2	EX4	E6	7	Y	-	-	-	-	-	-	-
2015-06-08	1	2	Cont4	F6	9	-	Y	-	Y	-	-	-	-	-		2015-06-08	1	2	EX4	F6	7	Y	-	-	-	-	-	-	-
2015-06-08	1	2	Cont4	G6	7	Y	-	-	-	-	-	-	-	-		2015-06-08	1	2	EX4	G6	7	Y	-	-	-	-	-	-	-
2015-06-08	1	2	Cont4	H6	6	Y	-	-	-	-	-	-	-	-		2015-06-08	1	2	EX4	H6	9	-	Y	-	Y	-	-	-	-
2015-06-09	1	3	Cont5	A1	6	Y	-	-	-	-	-	-	-	-		2015-06-09	1	3	Ex5	A1	?	Y	-	-	UNDETERMINED	-	-	-	-
2015-06-09	1	3	Cont5	B1	?	Y	-	-	UNDETERMINED	-	-	-	-	-		2015-06-09	1	3	Ex5	B1	PREZOEA	-	Y	N	Y	N	Y	IMPAIRED	N
2015-06-09	1	3	Cont5	C1	ZOEA	-	Y	Y	Y	Y	Y	Y	Y	-		2015-06-09	1	3	Ex5	C1	6	Y	-	-	-	-	-	-	-
2015-06-09	1	3	Cont5	D1	ZOEA	-	Y	Y	Y	Y	Y	Y	Y	-		2015-06-09	1	3	Ex5	D1	PREZOEA	-	Y	N	Y	N	Y	IMPAIRED	N
2015-06-09	1	3	Cont5	E1	6	Y	-	-	-	-	-	-	-	-		2015-06-09	1	3	Ex5	E1	MISSING	-	-	-	-	-	-	-	-
2015-06-09	1	3	Cont5	F1	MISSING	-	-	-	-	-	-	-	-	-		2015-06-09	1	3	Ex5	F1	?	Y	-	-	UNDETERMINED	-	-	-	-
2015-06-09	1	3	Cont5	G1	8	Y	-	-	-	-	-	-	-	-		2015-06-09	1	3	Ex5	G1	MISSING	-	-	-	-	-	-	-	-
2015-06-09	1	3	Cont5	H1	7	Y	-	-	-	-	-	-	-	-		2015-06-09	1	3	Ex5	H1	6	Y	-	-	-	-	-	-	-
2015-06-09	1	3	Cont5	A2	7	Y	-	-	-	-	-	-	-	-		2015-06-09	1	3	Ex5	A2	ZOEA	-	Y	Y	Y	Y	Y	Y	Y
2015-06-09	1	3	Cont5	B2	9	-	Y	-	Y	-	-	-	-	-		2015-06-09	1	3	Ex5	B2	MISSING	-	-	-	-	-	-	-	-
2015-06-09	1	3	Cont5	C2	ZOEA	-	Y	Y	Y	Y	Y	Y	Y	-		2015-06-09	1	3	Ex5	C2	6	Y	-	-	-	-	-	-	-
2015-06-09	1	3	Cont5	D2	6	Y	-	-	-	-	-	-	-	-		2015-06-09	1	3	Ex5	D2	ZOEA	-	Y	Y	Y	Y	Y	Y	Y
2015-06-09	1	3	Cont5	E2	ZOEA	-	Y	Y	Y	Y	Y	Y	Y	-		2015-06-09	1	3	Ex5	E2	?	Y	-	-	UNDETERMINED	-	-	-	-
2015-06-09	1	3	Cont5	F2	6	Y	-	-	-	-	-	-	-	-		2015-06-09	1	3	Ex5	F2	ZOEA	-	Y	Y	Y	Y	Y	Y	Y
2015-06-09	1	3	Cont5	G2	8	Y	-	-	-	-	-	-	-	-		2015-06-09	1	3	Ex5	G2	6	Y	-	-	-	-	-	-	-
2015-06-09	1	3	Cont5	H2	6	Y	-	-	-	-	-	-	-	-		2015-06-09	1	3	Ex5	H2	6	Y	-	-	-	-	-	-	-
2015-06-09	1	3	Cont5	A3	ZOEA	-	-	-	-	-	-	-	-	-		2015-06-09	1	3	Ex5	A3	?	y	-	-	UNDETERMINED	-	-	-	-
2015-06-09	1	3	Cont5	B3	MISSING	-	-	-	-	-	-	-	-	-		2015-06-09	1	3	Ex5	B3	MISSING	-	-	-	-	-	-	-	-
2015-06-09	1	3	Cont5	C3	MISSING	-	-	-	-	-	-	-	-	-		2015-06-09	1	3	Ex5	C3	9	-	Y	-	Y	-	-	-	-
2015-06-09	1	3	Cont5	D3	ZOEA	-	-	-	-	-	-	-	-	-		2015-06-09	1	3	Ex5	D3	PREZOEA	-	Y	N	Y	N	Y	IMPAIRED	N
2015-06-09	1	3	Cont5	E5	?	Y	-	-	UNDETERMINED	-	-	-	-	-		2015-06-09	1	3	Ex5	E3	ZOEA	-	Y	Y	Y	Y	Y	Y	Y
2015-06-09	1	3	Cont5	F3	8	-	-	-	Y	-	-	-	-	-		2015-06-09	1	3	Ex5	F3	6	Y	-	-	-	-	-	-	-
2015-06-09	1	3	Cont5	G3	ZOEA	-	Y	Y	Y	Y	Y	Y	Y	-		2015-06-09	1	3	Ex5	G3	PREZOEA	-	Y	N	Y	N	Y	IMPAIRED	N
2015-06-09	1	3	Cont5	H3	9	-	Y	-	Y	-	-	-	-	-		2015-06-09	1	3	Ex5	H3	ZOEA	-	Y	Y	Y	Y	Y	Y	Y
2015-06-09	1	3	Cont5	A4	ZOEA	-	Y	Y	Y	Y	Y	Y	Y	-		2015-06-09	1	3	Ex5	A4	6	Y	-	-	-	-	-	-	-
2015-06-09	1	3	Cont5	B4	8	-	-	-	-	-	-	-	-	-		2015-06-09	1	3	Ex5	B4	MISSING	-	-	-	-	-	-	-	-
2015-06-09	1	3	Cont5	C4	ZOEA	-	Y	Y	Y	Y	Y	Y	Y	-		2015-06-09	1	3	Ex5	C4	?	Y	-	-	UNDETERMINED	-	-	-	-
2015-06-09	1	3	Cont5	D4	ZOEA	-	Y	Y	Y	Y	Y	Y	Y	-		2015-06-09	1	3	Ex5	D4	6	Y	-	-	-	-	-	-	-
2015-06-09	1	3	Cont5	E4	ZOEA	-	Y	Y	Y	Y	Y	Y	Y	-		2015-06-09	1	3	Ex5	E4	?	Y	-	-	UNDETERMINED	-	-	-	-
2015-06-09	1	3	Cont5	F4	7	Y	-	-	-	-	-	-	-	-		2015-06-09	1	3	Ex5	F4	6	Y	-	-	-	-	-	-	-
2015-06-09	1	3	Cont5	G4	ZOEA	-	Y	Y	Y	Y	Y	Y	Y	-		2015-06-09	1	3	Ex5	G4	?	Y	-	-	UNDETERMINED	-	-	-	-
2015-06-09	1	3	Cont5	H4	ZOEA	-	Y	Y	Y	Y	Y	Y	Y	-		2015-06-09	1	3	Ex5	H4	?	Y	-	-	UNDETERMINED	-	-	-	-
2015-06-09	1	3	Cont5	A5	8	-	-	-	Y	-	-	-	-	-		2015-06-09	1	3	Ex5	A5	6	Y	-	-	-	-	-	-	-
2015-06-09	1	3	Cont5	B5	6	Y	-	-	-	-	-	-	-	-		2015-06-09	1	3	Ex5	B5	?	Y	-	-	UNDETERMINED	-	-	-	-
2015-06-09	1	3	Cont5	C5	?	Y	-	-	UNDETERMINED	-	-	-	-	-		2015-06-09	1	3	Ex5	C5	MISSING	-	-	-	-	-	-	-	-
2015-06-09	1	3	Cont5	D5	6	Y	-	-	-	-	-	-	-	-		2015-06-09	1	3	Ex5	D5	?	Y	-	-	UNDETERMINED	-	-	-	-
2015-06-09	1	3	Cont5	E5	ZOEA	-	Y	Y	Y	Y	Y	Y	Y	-		2015-06-09	1	3	Ex5	E5	?	Y	-	-	UNDETERMINED	-	-	-	-
2015-06-09	1	3	Cont5	F5	7	Y	-	-	-	-	-	-	-	-		2015-06-09	1	3	Ex5	F5	ZOEA	-	Y	Y	Y	Y	Y	Y	Y
2015-06-09	1	3	Cont5	G5	ZOEA	-	Y	Y	Y	Y	Y	Y	Y	-		2015-06-09	1	3	Ex5	G5	ZOEA	-	Y	Y	Y	Y	Y	Y	Y
2015-06-09	1	3	Cont5	H5	ZOEA	-	Y	Y	Y	Y	Y	Y	Y	-		2015-06-09	1	3	Ex5	H5	6	Y	-	-	-	-	-	-	-
2015-06-09	1	3	Cont5	A6	ZOEA	-	Y	Y	Y	Y	Y	Y	Y	-		2015-06-09	1	3	Ex5	A6	?	Y	-	-	UNDETERMINED	-	-	-	-
2015-06-09	1	3	Cont5	B6	7	Y	-	-	-	-	-	-	-	-		2015-06-09	1	3	Ex5	B6	?	Y	-	-	UNDETERMINED	-	-	-	-
2015-06-09	1	3	Cont5	C6	7	Y	-	-	-	-	-	-	-	-		2015-06-09	1	3	Ex5	C6	7	Y	-	-	-	-	-	-	-
2015-06-09	1	3	Cont5	D6	9	-	Y	-	Y	-	-	-	-	-		2015-06-09	1	3	Ex5	D6	ZOEA	-	Y	Y	Y	Y	Y	Y	Y
2015-06-09	1	3	Cont5	E6	8	-	-	-	Y	-	-	-	-	-		2015-06-09	1	3	Ex5	E6	ZOEA	-	Y	Y	Y	Y	Y	Y	Y
2015-06-09	1	3	Cont5	F6	MISSING	-	-	-	-	-	-	-	-	-		2015-06-09	1	3	Ex5	F6	ZOEA	-	Y	Y	Y	Y	Y	Y	Y
2015-06-09	1	3	Cont5	G6	ZOEA	-	Y	Y	Y	Y	Y	Y	Y	-		2015-06-09	1	3	Ex5	G6	MISSING	-	-	-	-	-	-	-	-
2015-06-09	1	3	Cont5	H6	MISSING	-	-	-	-	-	-	-	-	-		2015-06-09	1	3	Ex5	H6	ZOEA	-	Y	Y	Y	Y	Y	Y	Y

## Sheet: Replicate 2
Date	Replicate #	Day	Plate ID	Well ID	Stage	Cloudy/Dark	Heart beat	Dorsal Spine	Eyes (Full & Bilaterally symmetrical)	Rostrum	Telson	Swimming ablility	Lateral Spines			Date	Replicate #	Day	Plate ID	Well ID	Stage	Cloudy/Dark	Heart beat	Dorsal Spine	Eyes (Full & Bilaterally symmetrical)	Rostrum	Telson	Swimming ablility	Lateral Spines
2015-06-28	2	1	Cont1	A1	6	-	-	-	Y	-	-	-	-			2015-06-28	2	1	Ex1	A1	5	Y	-	-	NOT PRESENT	-	-	-	-
2015-06-28	2	1	Cont1	B1	6	-	-	-	Y	-	-	-	-			2015-06-28	2	1	Ex1	B1	6	-	-	-	Y	-	-	-	-
2015-06-28	2	1	Cont1	C1	7	-	-	-	Y	-	-	-	-			2015-06-28	2	1	Ex1	C1	5	Y	-	-	NOT PRESENT	-	-	-	-
2015-06-28	2	1	Cont1	D1	6	-	-	-	Y	-	-	-	-			2015-06-28	2	1	Ex1	D1	6	-	-	-	Y	-	-	-	-
2015-06-28	2	1	Cont1	E1	?	Y	-	-	UNDETERMINED	-	-	-	-			2015-06-28	2	1	Ex1	E1	5	Y	-	-	NOT PRESENT	-	-	-	-
2015-06-28	2	1	Cont1	F1	6	-	-	-	Y	-	-	-	-			2015-06-28	2	1	Ex1	F1	5	-	-	-	NOT PRESENT	-	-	-	-
2015-06-28	2	1	Cont1	G1	6	-	-	-	Y	-	-	-	-			2015-06-28	2	1	Ex1	G1	5	-	-	-	NOT PRESENT	-	-	-	-
2015-06-28	2	1	Cont1	H1	8	-	-	-	Y	-	-	-	-			2015-06-28	2	1	Ex1	H1	6	-	-	-	Y	-	-	-	-
2015-06-28	2	1	Cont1	A2	6	Y	-	-	Y	-	-	-	-			2015-06-28	2	1	Ex1	A2	6	-	-	-	Y	-	-	-	-
2015-06-28	2	1	Cont1	B2	6	-	-	-	Y	-	-	-	-			2015-06-28	2	1	Ex1	B2	5	Y	-	-	NOT PRESENT	-	-	-	-
2015-06-28	2	1	Cont1	C2	7	-	-	-	Y	-	-	-	-			2015-06-28	2	1	Ex1	C2	5	Y	-	-	NOT PRESENT	-	-	-	-
2015-06-28	2	1	Cont1	D2	7	-	-	-	Y	-	-	-	-			2015-06-28	2	1	Ex1	D2	6	-	-	-	Y	-	-	-	-
2015-06-28	2	1	Cont1	E2	6	-	-	-	Y	-	-	-	-			2015-06-28	2	1	Ex1	E2	5	Y	-	-	NOT PRESENT	-	-	-	-
2015-06-28	2	1	Cont1	F2	8	-	-	-	Y	-	-	-	-			2015-06-28	2	1	Ex1	F2	5	-	-	-	NOT PRESENT	-	-	-	-
2015-06-28	2	1	Cont1	G2	6	-	-	-	Y	-	-	-	-			2015-06-28	2	1	Ex1	G2	5	-	-	-	NOT PRESENT	-	-	-	-
2015-06-28	2	1	Cont1	H2	8	-	-	-	Y	-	-	-	-			2015-06-28	2	1	Ex1	H2	5	Y	-	-	NOT PRESENT	-	-	-	-
2015-06-28	2	1	Cont1	A3	6	Y	-	-	Y	-	-	-	-			2015-06-28	2	1	Ex1	A3	5	-	-	-	NOT PRESENT	-	-	-	-
2015-06-28	2	1	Cont1	B3	6	-	-	-	Y	-	-	-	-			2015-06-28	2	1	Ex1	B3	5	Y	-	-	NOT PRESENT	-	-	-	-
2015-06-28	2	1	Cont1	C3	8	-	-	-	Y	-	-	-	-			2015-06-28	2	1	Ex1	C3	PREZOEA	-	Y	N	Y	N	Y	IMPAIRED	N
2015-06-28	2	1	Cont1	D3	8	-	-	-	Y	-	-	-	-			2015-06-28	2	1	Ex1	D3	6	-	-	-	Y	-	-	-	-
2015-06-29	2	1	Cont1	E4	8	-	-	-	Y	-	-	-	-			2015-06-28	2	1	Ex1	E2	5	Y	-	-	NOT PRESENT	-	-	-	-
2015-06-28	2	1	Cont1	F3	6	-	-	-	Y	-	-	-	-			2015-06-28	2	1	Ex1	F3	6	-	-	-	Y	-	-	-	-
2015-06-28	2	1	Cont1	G3	8	-	-	-	Y	-	-	-	-			2015-06-28	2	1	Ex1	G3	5	-	-	-	NOT PRESENT	-	-	-	-
2015-06-28	2	1	Cont1	H3	6	-	-	-	Y	-	-	-	-			2015-06-28	2	1	Ex1	H3	6	-	-	-	Y	-	-	-	-
2015-06-28	2	1	Cont1	A4	6	Y	-	-	BROKEN UP	-	-	-	-			2015-06-28	2	1	Ex1	A4	6	-	-	-	Y	-	-	-	-
2015-06-28	2	1	Cont1	B4	6	Y	-	-	BROKEN UP	-	-	-	-			2015-06-28	2	1	Ex1	B4	5	Y	-	-	NOT PRESENT	-	-	-	-
2015-06-28	2	1	Cont1	C4	7	-	-	-	Y	-	-	-	-			2015-06-28	2	1	Ex1	C4	5	-	-	-	NOT PRESENT	-	-	-	-
2015-06-28	2	1	Cont1	D4	6	Y	-	-	BROKEN UP	-	-	-	-			2015-06-28	2	1	Ex1	D4	6	Y	-	-	BROKEN UP	-	-	-	-
2015-06-28	2	1	Cont1	E4	8	-	-	-	Y	-	-	-	-			2015-06-28	2	1	Ex1	E4	5	Y	-	-	NOT PRESENT	-	-	-	-
2015-06-28	2	1	Cont1	F4	7	-	-	-	Y	-	-	-	-			2015-06-28	2	1	Ex1	F4	6	-	-	-	Y	-	-	-	-
2015-06-28	2	1	Cont1	G4	6	-	-	-	Y	-	-	-	-			2015-06-28	2	1	Ex1	G4	5	Y	-	-	NOT PRESENT	-	-	-	-
2015-06-28	2	1	Cont1	H4	6	Y	-	-	BROKEN UP	-	-	-	-			2015-06-28	2	1	Ex1	H4	5	Y	-	-	NOT PRESENT	-	-	-	-
2015-06-28	2	1	Cont1	A5	6	Y	-	-	BROKEN UP	-	-	-	-			2015-06-28	2	1	Ex1	A5	4	Y	-	-	NOT PRESENT	-	-	-	-
2015-06-28	2	1	Cont1	B5	8	-	-	-	Y	-	-	-	-			2015-06-28	2	1	Ex1	B5	5	Y	-	-	NOT PRESENT	-	-	-	-
2015-06-28	2	1	Cont1	C5	7	Y	-	-	Y	-	-	-	-			2015-06-28	2	1	Ex1	C5	5	Y	-	-	NOT PRESENT	-	-	-	-
2015-06-28	2	1	Cont1	D5	6	Y	-	-	BROKEN UP	-	-	-	-			2015-06-28	2	1	Ex1	D5	6	-	-	-	Y	-	-	-	-
2015-06-28	2	1	Cont1	E5	8	-	-	-	Y	-	-	-	-			2015-06-28	2	1	Ex1	E5	6	-	-	-	Y	-	-	-	-
2015-06-28	2	1	Cont1	F5	8	-	-	-	Y	-	-	-	-			2015-06-28	2	1	Ex1	F5	5	-	-	-	NOT PRESENT	-	-	-	-
2015-06-28	2	1	Cont1	G5	6	Y	-	-	BROKEN UP	-	-	-	-			2015-06-28	2	1	Ex1	G5	6	Y	-	-	BROKEN UP	-	-	-	-
2015-06-28	2	1	Cont1	H5	7	-	-	-	Y	-	-	-	-			2015-06-28	2	1	Ex1	H5	5	-	-	-	NOT PRESENT	-	-	-	-
2015-06-28	2	1	Cont1	A6	8	-	-	-	Y	-	-	-	-			2015-06-28	2	1	Ex1	A6	5	Y	-	-	NOT PRESENT	-	-	-	-
2015-06-28	2	1	Cont1	B6	8	-	-	-	Y	-	-	-	-			2015-06-28	2	1	Ex1	B6	6	-	-	-	Y	-	-	-	-
2015-06-28	2	1	Cont1	C6	8	-	-	-	Y	-	-	-	-			2015-06-28	2	1	Ex1	C6	6	Y	-	-	NOT PRESENT	-	-	-	-
2015-06-28	2	1	Cont1	D6	7	-	-	-	Y	-	-	-	-			2015-06-28	2	1	Ex1	D6	6	-	-	-	Y	-	-	-	-
2015-06-28	2	1	Cont1	E6	8	-	-	-	Y	-	-	-	-			2015-06-28	2	1	Ex1	E6	6	Y	-	-	BROKEN UP	-	-	-	-
2015-06-28	2	1	Cont1	F6	7	Y	-	-	Y	-	-	-	-			2015-06-28	2	1	Ex1	F6	5	Y	-	-	NOT PRESENT	-	-	-	-
2015-06-28	2	1	Cont1	G6	6	-	-	-	Y	-	-	-	-			2015-06-28	2	1	Ex1	G6	6	-	-	-	Y	-	-	-	-
2015-06-29	2	1	Cont1	H6	6	Y	-	-	BROKEN UP	-	-	-	-			2015-06-28	2	2	Ex1	H6	5	-	-	-	NOT PRESENT	-	-	-	-
2015-06-29	2	2	CONT2	A1	7	Y	-	-	NOT PRESENT	-	-	-	-			2015-06-29	2	2	EX2	A1	9	-	Y	-	Y	-	-	-	-
2015-06-29	2	2	CONT2	B1	7	Y	-	-	BROKEN UP	-	-	-	-			2015-06-29	2	2	EX2	B1	?	Y	-	-	UNDETERMINED	-	-	-	-
2015-06-29	2	2	CONT2	C1	7	Y	-	-	Y	-	-	-	-			2015-06-29	2	2	EX2	C1	7	Y	-	-	BROKEN UP	-	-	-	-
2015-06-29	2	2	CONT2	D1	6	Y	-	-	BROKEN UP	-	-	-	-			2015-06-29	2	2	EX2	D1	7	Y	-	-	BROKEN UP	-	-	-	-
2015-06-29	2	2	CONT2	E1	9	-	Y	-	Y	-	-	-	-			2015-06-29	2	2	EX2	E1	7	Y	-	-	BROKEN UP	-	-	-	-
2015-06-29	2	2	CONT2	F1	6	Y	-	-	BROKEN UP	-	-	-	-			2015-06-29	2	2	EX2	F1	6	Y	-	-	BROKEN UP	-	-	-	-
2015-06-29	2	2	CONT2	G1	6	Y	-	-	BROKEN UP	-	-	-	-			2015-06-29	2	2	EX2	G1	7	Y	-	-	BROKEN UP	-	-	-	-
2015-06-29	2	2	CONT2	H1	8	-	-	-	Y	-	-	-	-			2015-06-29	2	2	EX2	H1	7	Y	-	-	BROKEN UP	-	-	-	-
2015-06-29	2	2	CONT2	A2	8	-	-	-	Y	-	-	-	-			2015-06-29	2	2	EX2	A2	7	Y	-	-	BROKEN UP	-	-	-	-
2015-06-29	2	2	CONT2	B2	8	-	-	-	Y	-	-	-	-			2015-06-29	2	2	EX2	B2	6	Y	-	-	BROKEN UP	-	-	-	-
2015-06-29	2	2	CONT2	C2	8	-	-	-	Y	-	-	-	-			2015-06-29	2	2	EX2	C2	7	Y	-	-	BROKEN UP	-	-	-	-
2015-06-29	2	2	CONT2	D2	8	Y	-	-	BROKEN UP	-	-	-	-			2015-06-29	2	2	EX2	D2	7	Y	-	-	BROKEN UP	-	-	-	-
2015-06-29	2	2	CONT2	E2	8	-	-	-	Y	-	-	-	-			2015-06-29	2	2	EX2	E2	8	Y	-	-	Y	-	-	-	-
2015-06-29	2	2	CONT2	F2	8	Y	-	-	BROKEN UP	-	-	-	-			2015-06-29	2	2	EX2	F2	7	Y	-	-	BROKEN UP	-	-	-	-
2015-06-29	2	2	CONT2	G2	8	-	-	-	Y	-	-	-	-			2015-06-29	2	2	EX2	G2	7	Y	-	-	BROKEN UP	-	-	-	-
2015-06-29	2	2	CONT2	H2	6	Y	-	-	BROKEN UP	-	-	-	-			2015-06-29	2	2	EX2	H2	9	-	Y	-	Y	-	-	-	-
2015-06-29	2	2	CONT2	A3	9	-	Y	-	Y	-	-	-	-			2015-06-29	2	2	EX2	A3	7	Y	-	-	BROKEN UP	-	-	-	-
2015-06-29	2	2	CONT2	B3	7	Y	-	-	BROKEN UP	-	-	-	-			2015-06-29	2	2	EX2	B3	7	Y	-	-	BROKEN UP	-	-	-	-
2015-06-29	2	2	CONT2	C3	8	-	-	-	Y	-	-	-	-			2015-06-29	2	2	EX2	C3	9	-	Y	-	Y	-	-	-	-
2015-06-30	2	2	CONT2	D3	6	Y	-	-	BROKEN UP	-	-	-	-			2015-06-29	2	2	EX2	D3	8	Y	-	-	BROKEN UP	-	-	-	-
2015-06-29	2	2	CONT3	E3	9	-	Y	-	Y	-	-	-	-			2015-06-29	2	2	EX2	E3	6	Y	-	-	BROKEN UP	-	-	-	-
2015-06-29	2	2	CONT2	F3	6	Y	-	-	BROKEN UP	-	-	-	-			2015-06-29	2	2	EX2	F3	8	-	-	-	Y	-	-	-	-
2015-06-29	2	2	CONT2	G3	9	-	Y	-	Y	-	-	-	-			2015-06-29	2	2	EX2	G3	7	Y	-	-	BROKEN UP	-	-	-	-
2015-06-29	2	2	CONT2	H3	8	-	-	-	Y	-	-	-	-			2015-06-29	2	2	EX2	H3	7	Y	-	-	BROKEN UP	-	-	-	-
2015-06-29	2	2	CONT2	A4	7	Y	-	-	BROKEN UP	-	-	-	-			2015-06-29	2	2	EX2	A4	7	Y	-	-	BROKEN UP	-	-	-	-
2015-06-29	2	2	CONT2	B4	9	-	Y	-	Y	-	-	-	-			2015-06-29	2	2	EX2	B4	8	Y	-	-	BROKEN UP	-	-	-	-
2015-06-29	2	2	CONT2	C4	6	-	-	-	BROKEN UP	-	-	-	-			2015-06-29	2	2	EX2	C4	8	Y	-	-	BROKEN UP	-	-	-	-
2015-06-29	2	2	CONT2	D4	6	Y	-	-	BROKEN UP	-	-	-	-			2015-06-29	2	2	EX2	D4	9	-	Y	-	Y	-	-	-	-
2015-06-29	2	2	CONT2	E4	9	-	Y	-	Y	-	-	-	-			2015-06-29	2	2	EX2	E4	7	Y	-	-	BROKEN UP	-	-	-	-
2015-06-29	2	2	CONT2	F4	7	Y	-	-	BROKEN UP	-	-	-	-			2015-06-29	2	2	EX2	F4	7	Y	-	-	BROKEN UP	-	-	-	-
2015-06-29	2	2	CONT2	G4	7	Y	-	-	BROKEN UP	-	-	-	-			2015-06-29	2	2	EX2	G4	9	-	Y	-	Y	-	-	-	-
2015-06-29	2	2	CONT2	H4	6	Y	-	-	BROKEN UP	-	-	-	-			2015-06-29	2	2	EX2	H4	9	-	Y	-	Y	-	-	-	-
2015-06-29	2	2	CONT2	A5	7	Y	-	-	BROKEN UP	-	-	-	-			2015-06-29	2	2	EX2	A5	8	Y	-	-	BROKEN UP	-	-	-	-
2015-06-29	2	2	CONT2	B5	7	Y	-	-	BROKEN UP	-	-	-	-			2015-06-29	2	2	EX2	B5	7	Y	-	-	BROKEN UP	-	-	-	-
2015-06-29	2	2	CONT2	C5	7	Y	-	-	BROKEN UP	-	-	-	-			2015-06-29	2	2	EX2	C5	6	Y	-	-	BROKEN UP	-	-	-	-
2015-06-29	2	2	CONT2	D5	8	Y	-	-	BROKEN UP	-	-	-	-			2015-06-29	2	2	EX2	D5	9	-	Y	-	Y	-	-	-	-
2015-06-29	2	2	CONT2	E5	6	Y	-	-	BROKEN UP	-	-	-	-			2015-06-29	2	2	EX2	E5	8	-	-	-	Y	-	-	-	-
2015-06-29	2	2	CONT2	F5	9	-	Y	-	Y	-	-	-	-			2015-06-29	2	2	EX2	F5	7	Y	-	-	BROKEN UP	-	-	-	-
2015-06-29	2	2	CONT2	G5	8	-	-	-	Y	-	-	-	-			2015-06-29	2	2	EX2	G5	7	Y	-	-	BROKEN UP	-	-	-	-
2015-06-29	2	2	CONT2	H5	9	-	Y	-	Y	-	-	-	-			2015-06-29	2	2	EX2	H5	8	Y	-	-	BROKEN UP	-	-	-	-
2015-06-29	2	2	CONT2	A6	6	Y	-	-	BROKEN UP	-	-	-	-			2015-06-29	2	2	EX2	A6	8	Y	-	-	BROKEN UP	-	-	-	-
2015-06-29	2	2	CONT2	B6	7	Y	-	-	BROKEN UP	-	-	-	-			2015-06-29	2	2	EX2	B6	7	Y	-	-	BROKEN UP	-	-	-	-
2015-06-29	2	2	CONT2	C6	6	Y	-	-	BROKEN UP	-	-	-	-			2015-06-29	2	2	EX2	C6	7	Y	-	-	BROKEN UP	-	-	-	-
2015-06-29	2	2	CONT2	D6	9	-	Y	-	Y	-	-	-	-			2015-06-29	2	2	EX2	D6	8	Y	-	-	BROKEN UP	-	-	-	-
2015-06-29	2	2	CONT2	E6	8	-	-	-	Y	-	-	-	-			2015-06-29	2	2	EX2	E6	8	-	-	-	Y	-	-	-	-
2015-06-29	2	2	CONT2	F6	7	Y	-	-	BROKEN UP	-	-	-	-			2015-06-29	2	2	EX2	F6	9	-	Y	-	Y	-	-	-	-
2015-06-29	2	2	CONT2	G6	7	-	-	-	BROKEN UP	-	-	-	-			2015-06-29	2	2	EX2	G6	8	-	-	-	Y	-	-	-	-
2015-06-30	2	2	CONT2	H6	6	-	-	-	BROKEN UP	-	-	-	-			2015-06-29	2	3	EX2	H6	8	-	-	-	Y	-	-	-	-
2015-06-30	2	3	CONT3	A1	8	Y	-	-	BROKEN UP	-	-	-	-			2015-06-30	2	3	EX3	A1	8	Y	-	-	BROKEN UP	-	-	-	-
2015-06-30	2	3	CONT3	B1	7	Y	-	-	BROKEN UP	-	-	-	-			2015-06-30	2	3	EX3	B1	ZOEA	-	Y	Y	Y	Y	Y	Y	Y
2015-06-30	2	3	CONT3	C1	6	Y	-	-	BROKEN UP	-	-	-	-			2015-06-30	2	3	EX3	C1	8	Y	-	-	BROKEN UP	-	-	-	-
2015-06-30	2	3	CONT3	D1	8	Y	-	-	BROKEN UP	-	-	-	-			2015-06-30	2	3	EX3	D1	8	Y	-	-	BROKEN UP	-	-	-	-
2015-06-30	2	3	CONT3	E1	8	Y	-	-	BROKEN UP	-	-	-	-			2015-06-30	2	3	EX3	E1	ZOEA	-	Y	Y	Y	Y	Y	Y	Y
2015-06-30	2	3	CONT3	F1	8	-	-	-	Y	-	-	-	-			2015-06-30	2	3	EX3	F1	PREZOEA	-	Y	N	Y	N	Y	IMPAIRED	N
2015-06-30	2	3	CONT3	G1	ZOEA	-	Y	Y	Y	Y	Y	Y	Y			2015-06-30	2	3	EX3	G1	8	Y	-	-	BROKEN UP	-	-	-	-
2015-06-30	2	3	CONT3	H1	8	Y	-	-	BROKEN UP	-	-	-	-			2015-06-30	2	3	EX3	H1	8	-	-	-	BROKEN UP	-	-	-	-
2015-06-30	2	3	CONT3	A2	8	Y	-	-	BROKEN UP	-	-	-	-			2015-06-30	2	3	EX3	A2	PREZOEA	-	Y	N	Y	N	Y	IMPAIRED	N
2015-06-30	2	3	CONT3	B2	9	Y	-	-	BROKEN UP	-	-	-	-			2015-06-30	2	3	EX3	B2	8	Y	-	-	BROKEN UP	-	-	-	-
2015-06-30	2	3	CONT3	C2	9	Y	-	-	BROKEN UP	-	-	-	-			2015-06-30	2	3	EX3	C2	ZOEA	-	Y	Y	Y	Y	Y	Y	Y
2015-06-30	2	3	CONT3	D2	9	Y	-	-	BROKEN UP	-	-	-	-			2015-06-30	2	3	EX3	D2	PREZOEA	-	Y	SHORT	Y	N	Y	IMPAIRED	Y
2015-06-30	2	3	CONT3	E2	9	Y	-	-	BROKEN UP	-	-	-	-			2015-06-30	2	3	EX3	E2	ZOEA	-	Y	Y	Y	Y	Y	Y	Y
2015-06-30	2	3	CONT3	F2	9	Y	-	-	BROKEN UP	-	-	-	-			2015-06-30	2	3	EX3	F2	ZOEA	-	Y	Y	Y	Y	Y	Y	Y
2015-06-30	2	3	CONT3	G2	?	Y	-	-	UNDETERMINED	-	-	-	-			2015-06-30	2	3	EX3	G2	ZOEA	-	Y	Y	Y	Y	Y	Y	Y
2015-06-30	2	3	CONT3	H2	9	Y	-	-	BROKEN UP	-	-	-	-			2015-06-30	2	3	EX3	H2	ZOEA	-	Y	Y	Y	Y	Y	Y	Y
2015-06-30	2	3	CONT3	A3	9	Y	-	-	BROKEN UP	-	-	-	-			2015-06-30	2	3	EX3	A3	8	Y	-	-	BROKEN UP	-	-	-	-
2015-06-30	2	3	CONT3	B3	9	Y	-	-	BROKEN UP	-	-	-	-			2015-06-30	2	3	EX3	B3	8	Y	-	-	BROKEN UP	-	-	-	-
2015-06-30	2	3	CONT3	C3	9	Y	-	-	BROKEN UP	-	-	-	-			2015-06-30	2	3	EX3	C3	ZOEA	-	Y	Y	Y	Y	Y	Y	Y
2015-06-30	2	3	CONT3	D3	9	Y	-	-	BROKEN UP	-	-	-	-			2015-06-30	2	3	EX3	D3	?	Y	-	-	UNDETERMINED	-	-	-	-
2015-06-30	2	3	CONT4	E3	9	Y	-	-	Y	-	-	-	-			2015-06-30	2	3	EX4	E3	8	-	-	-	Y	-	-	-	-
2015-06-30	2	3	CONT3	F3	9	Y	-	-	BROKEN UP	-	-	-	-			2015-06-30	2	3	EX3	F3	8	Y	-	-	BROKEN UP	-	-	-	-
2015-06-30	2	3	CONT3	G3	9	Y	-	-	BROKEN UP	-	-	-	-			2015-06-30	2	3	EX3	G3	8	Y	-	-	BROKEN UP	-	-	-	-
2015-06-30	2	3	CONT3	H3	9	Y	-	-	BROKEN UP	-	-	-	-			2015-06-30	2	3	EX3	H3	8	Y	-	-	BROKEN UP	-	-	-	-
2015-06-30	2	3	CONT3	A4	?	Y	-	-	BROKEN UP	-	-	-	-			2015-06-30	2	3	EX3	A4	8	Y	-	-	BROKEN UP	-	-	-	-
2015-06-30	2	3	CONT3	B4	9	Y	-	-	BROKEN UP	-	-	-	-			2015-06-30	2	3	EX3	B4	ZOEA	-	Y	Y	Y	Y	Y	Y	Y
2015-06-30	2	3	CONT3	C4	9	Y	-	-	BROKEN UP	-	-	-	-			2015-06-30	2	3	EX3	C4	ZOEA	-	Y	Y	Y	Y	Y	Y	Y
2015-06-30	2	3	CONT3	D4	9	Y	-	-	BROKEN UP	-	-	-	-			2015-06-30	2	3	EX3	D4	PREZOEA	-	Y	SHORT	Y	N	Y	IMPAIRED	N
2015-06-30	2	3	CONT3	E4	9	Y	-	-	BROKEN UP	-	-	-	-			2015-06-30	2	3	EX3	E4	8	Y	-	-	BROKEN UP	-	-	-	-
2015-06-30	2	3	CONT3	F4	9	Y	-	-	BROKEN UP	-	-	-	-			2015-06-30	2	3	EX3	F4	ZOEA	-	Y	Y	Y	Y	Y	Y	Y
2015-06-30	2	3	CONT3	G4	9	-	-	-	Y	-	-	-	-			2015-06-30	2	3	EX3	G4	8	Y	-	-	BROKEN UP	-	-	-	-
2015-06-30	2	3	CONT3	H4	ZOEA	-	Y	Y	Y	Y	Y	Y	Y			2015-06-30	2	3	EX3	H4	8	Y	-	-	BROKEN UP	-	-	-	-
2015-06-30	2	3	CONT3	A5	9	Y	-	-	BROKEN UP	-	-	-	-			2015-06-30	2	3	EX3	A5	ZOEA	-	Y	Y	Y	Y	Y	Y	Y
2015-06-30	2	3	CONT3	B5	9	Y	-	-	BROKEN UP	-	-	-	-			2015-06-30	2	3	EX3	B5	8	Y	-	-	BROKEN UP	-	-	-	-
2015-06-30	2	3	CONT3	C5	9	Y	-	-	BROKEN UP	-	-	-	-			2015-06-30	2	3	EX3	C5	ZOEA	-	Y	Y	Y	Y	Y	Y	Y
2015-06-30	2	3	CONT3	D5	9	Y	-	-	BROKEN UP	-	-	-	-			2015-06-30	2	3	EX3	D5	8	Y	-	-	BROKEN UP	-	-	-	-
2015-06-30	2	3	CONT3	E5	9	Y	-	-	BROKEN UP	-	-	-	-			2015-06-30	2	3	EX3	E5	ZOEA	-	Y	Y	Y	Y	Y	Y	Y
2015-06-30	2	3	CONT3	F5	9	Y	-	-	BROKEN UP	-	-	-	-			2015-06-30	2	3	EX3	F5	8	Y	-	-	BROKEN UP	-	-	-	-
2015-06-30	2	3	CONT3	G5	9	Y	-	-	BROKEN UP	-	-	-	-			2015-06-30	2	3	EX3	G5	ZOEA	-	Y	Y	Y	Y	Y	Y	Y
2015-06-30	2	3	CONT3	H5	9	Y	-	-	BROKEN UP	-	-	-	-			2015-06-30	2	3	EX3	H5	8	Y	-	-	BROKEN UP	-	-	-	-
2015-06-30	2	3	CONT3	A6	9	Y	-	-	BROKEN UP	-	-	-	-			2015-06-30	2	3	EX3	A6	8	Y	-	-	BROKEN UP	-	-	-	-
2015-06-30	2	3	CONT3	B6	9	Y	-	-	BROKEN UP	-	-	-	-			2015-06-30	2	3	EX3	B6	8	Y	-	-	BROKEN UP	-	-	-	-
2015-06-30	2	3	CONT3	C6	9	Y	-	-	BROKEN UP	-	-	-	-			2015-06-30	2	3	EX3	C6	8	Y	-	-	BROKEN UP	-	-	-	-
2015-06-30	2	3	CONT3	D6	8	-	-	-	Y	-	-	-	-			2015-06-30	2	3	EX3	D6	8	Y	-	-	BROKEN UP	-	-	-	-
2015-06-30	2	3	CONT3	E6	9	Y	-	-	BROKEN UP	-	-	-	-			2015-06-30	2	3	EX3	E6	8	Y	-	-	BROKEN UP	-	-	-	-
2015-06-30	2	3	CONT3	F6	9	Y	-	-	BROKEN UP	-	-	-	-			2015-06-30	2	3	EX3	F6	8	Y	-	-	BROKEN UP	-	-	-	-
2015-06-30	2	3	CONT3	G6	9	Y	-	-	BROKEN UP	-	-	-	-			2015-06-30	2	3	EX3	G6	8	Y	-	-	BROKEN UP	-	-	-	-
2015-06-30	2	3	CONT3	H6	9	Y	-	-	BROKEN UP	-	-	-	-			2015-06-30	2	3	EX3	H6	8	Y	-	-	BROKEN UP	-	-	-	-
2015-06-30	2	3	CONT4	A1	9	Y	-	-	BROKEN UP	-	-	-	-			2015-06-30	2	3	EX4	A1	MISSING	-	-	-	-	-	-	-	-
2015-06-30	2	3	CONT4	B1	PREZOEA	-	Y	N	Y	N	Y	IMPAIRED	N			2015-06-30	2	3	EX4	B1	9	Y	-	-	BROKEN UP	-	-	-	-
2015-06-30	2	3	CONT4	C1	9	Y	-	-	VERY LARGE BROKEN UP	-	-	-	-			2015-06-30	2	3	EX4	C1	6	Y	-	-	BROKEN UP	-	-	-	-
2015-06-30	2	3	CONT4	D1	9	Y	-	-	VERY LARGE BROKEN UP	-	-	-	-			2015-06-30	2	3	EX4	D1	9	Y	-	-	BROKEN UP	-	-	-	-
2015-06-30	2	3	CONT4	E1	ZOEA	-	-	-	-	-	-	-	-			2015-06-30	2	3	EX4	E1	9	Y	-	-	BROKEN UP	-	-	-	-
2015-06-30	2	3	CONT4	F1	ZOEA	-	-	-	-	-	-	-	-			2015-06-30	2	3	EX4	F1	9	Y	-	-	BROKEN UP	-	-	-	-
2015-06-30	2	3	CONT4	G1	9	Y	-	-	BROKEN UP	-	-	-	-			2015-06-30	2	3	EX4	G1	6	Y	-	-	BROKEN UP	-	-	-	-
2015-06-30	2	3	CONT4	H1	MISSING	-	-	-	-	-	-	-	-			2015-06-30	2	3	EX4	H1	ZOEA	-	Y	Y	Y	Y	Y	Y	Y
2015-06-30	2	3	CONT4	A2	9	Y	-	-	BROKEN UP	-	-	-	-			2015-06-30	2	3	EX4	A2	8	Y	-	-	BROKEN UP	-	-	-	-
2015-06-30	2	3	CONT4	B2	9	Y	-	-	BROKEN UP	-	-	-	-			2015-06-30	2	3	EX4	B2	7	Y	-	-	BROKEN UP	-	-	-	-
2015-06-30	2	3	CONT4	C2	9	Y	-	-	BROKEN UP	-	-	-	-			2015-06-30	2	3	EX4	C2	6	Y	-	-	BROKEN UP	-	-	-	-
2015-06-30	2	3	CONT4	D2	ZOEA	-	Y	Y	Y	Y	Y	Y	Y			2015-06-30	2	3	EX4	D2	6	Y	-	-	BROKEN UP	-	-	-	-
2015-06-30	2	3	CONT4	E2	9	Y	-	-	BROKEN UP	-	-	-	-			2015-06-30	2	3	EX4	E2	6	Y	-	-	BROKEN UP	-	-	-	-
2015-06-30	2	3	CONT4	F2	9	Y	-	-	BROKEN UP	-	-	-	-			2015-06-30	2	3	EX4	F2	7	Y	-	-	BROKEN UP	-	-	-	-
2015-06-30	2	3	CONT4	G2	9	Y	-	-	BROKEN UP	-	-	-	-			2015-06-30	2	3	EX4	G2	7	Y	-	-	BROKEN UP	-	-	-	-
2015-06-30	2	3	CONT4	H2	9	Y	-	-	BROKEN UP	-	-	-	-			2015-06-30	2	3	EX4	H2	6	Y	-	-	BROKEN UP	-	-	-	-
2015-06-30	2	3	CONT4	A3	9	Y	-	-	BROKEN UP	-	-	-	-			2015-06-30	2	3	EX4	A3	6	Y	-	-	BROKEN UP	-	-	-	-
2015-06-30	2	3	CONT4	B3	ZOEA	-	Y	Y	Y	Y	Y	Y	Y			2015-06-30	2	3	EX4	B3	9	Y	-	-	BROKEN UP	-	-	-	-
2015-06-30	2	3	CONT4	C3	9	Y	-	-	BROKEN UP	-	-	-	-			2015-06-30	2	3	EX4	C3	9	Y	-	-	BROKEN UP	-	-	-	-
2015-06-30	2	3	CONT4	D3	9	Y	-	-	BROKEN UP	-	-	-	-			2015-06-30	2	3	EX4	D3	9	Y	-	-	BROKEN UP	-	-	-	-
2015-06-30	2	3	CONT4	E3	9	Y	-	-	BROKEN UP	-	-	-	-			2015-06-30	2	3	EX4	E3	6	Y	-	-	BROKEN UP	-	-	-	-
2015-06-30	2	3	CONT4	F3	ZOEA	-	Y	Y	Y	Y	Y	Y	Y			2015-06-30	2	3	EX4	F3	ZOEA	-	Y	Y	Y	Y	Y	Y	Y
2015-06-30	2	3	CONT4	G3	9	Y	-	-	BROKEN UP	-	-	-	-			2015-06-30	2	3	EX4	G3	9	Y	-	-	BROKEN UP	-	-	-	-
2015-06-30	2	3	CONT4	H3	ZOEA	-	Y	Y	Y	Y	Y	Y	Y			2015-06-30	2	3	EX4	H3	9	Y	-	-	BROKEN UP	-	-	-	-
2015-06-30	2	3	CONT4	A4	ZOEA	-	Y	Y	Y	Y	Y	Y	Y			2015-06-30	2	3	EX4	A4	7	Y	-	-	BROKEN UP	-	-	-	-
2015-06-30	2	3	CONT4	B4	PREZOEA	-	Y	SHORT FORWARD	Y	N	Y	IMPAIRED	N			2015-06-30	2	3	EX4	B4	9	Y	-	-	BROKEN UP	-	-	-	-
2015-06-30	2	3	CONT4	C4	MISSING	-	-	-	-	-	-	-	-			2015-06-30	2	3	EX4	C4	ZOEA	-	Y	Y	Y	Y	Y	Y	Y
2015-06-30	2	3	CONT4	D4	ZOEA	-	Y	Y	Y	Y	Y	Y	Y			2015-06-30	2	3	EX4	D4	6	Y	-	-	BROKEN UP	-	-	-	-
2015-06-30	2	3	CONT4	E4	ZOEA	-	Y	Y	Y	Y	Y	Y	Y			2015-06-30	2	3	EX4	E4	9	Y	-	-	BROKEN UP	-	-	-	-
2015-06-30	2	3	CONT4	F4	ZOEA	-	Y	Y	Y	Y	Y	Y	Y			2015-06-30	2	3	EX4	F4	9	Y	-	-	BROKEN UP	-	-	-	-
2015-06-30	2	3	CONT4	G4	9	Y	-	-	BROKEN UP	-	-	-	-			2015-06-30	2	3	EX4	G4	6	Y	-	-	BROKEN UP	-	-	-	-
2015-06-30	2	3	CONT4	H4	9	Y	-	-	BROKEN UP	-	-	-	-			2015-06-30	2	3	EX4	H4	9	-	Y	-	Y	-	-	-	-
2015-06-30	2	3	CONT4	A5	ZOEA	-	Y	Y	Y	Y	Y	Y	Y			2015-06-30	2	3	EX4	A5	?	Y	-	-	UNDETERMINED	-	-	-	-
2015-06-30	2	3	CONT4	B5	ZOEA	-	Y	Y	Y	Y	Y	Y	Y			2015-06-30	2	3	EX4	B5	7	Y	-	-	BROKEN UP	-	-	-	-
2015-06-30	2	3	CONT4	C5	9	Y	-	-	BROKEN UP	-	-	-	-			2015-06-30	2	3	EX4	C5	ZOEA	-	Y	Y	Y	Y	Y	Y	Y
2015-06-30	2	3	CONT4	D5	ZOEA	-	Y	Y	Y	Y	Y	Y	Y			2015-06-30	2	3	EX4	D5	6	Y	-	-	BROKEN UP	-	-	-	-
2015-06-30	2	3	CONT4	E5	9	Y	-	-	BROKEN UP	-	-	-	-			2015-06-30	2	3	EX4	E5	9	Y	-	-	BROKEN UP	-	-	-	-
2015-06-30	2	3	CONT4	F5	9	Y	-	-	BROKEN UP	-	-	-	-			2015-06-30	2	3	EX4	F5	7	Y	-	-	BROKEN UP	-	-	-	-
2015-06-30	2	3	CONT4	G5	ZOEA	-	Y	Y	Y	Y	Y	Y	Y			2015-06-30	2	3	EX4	G5	7	Y	-	-	BROKEN UP	-	-	-	-
2015-06-30	2	3	CONT4	H5	PREZOEA	-	Y	N	Y	N	Y	IMPAIRED	N			2015-06-30	2	3	EX4	H5	9	Y	-	-	BROKEN UP	-	-	-	-
2015-06-30	2	3	CONT4	A6	9	Y	-	-	BROKEN UP	-	-	-	-			2015-06-30	2	3	EX4	A6	6	Y	-	-	BROKEN UP	-	-	-	-
2015-06-30	2	3	CONT4	B6	9	Y	-	-	BROKEN UP	-	-	-	-			2015-06-30	2	3	EX4	B6	ZOEA	-	Y	Y	Y	Y	Y	Y	Y
2015-06-30	2	3	CONT4	C6	9	Y	-	-	BROKEN UP	-	-	-	-			2015-06-30	2	3	EX4	C6	9	Y	-	-	BROKEN UP	-	-	-	-
2015-06-30	2	3	CONT4	D6	9	Y	-	-	BROKEN UP	-	-	-	-			2015-06-30	2	3	EX4	D6	?	Y	-	-	UNDETERMINED	-	-	-	-
2015-06-30	2	3	CONT4	E6	ZOEA	-	Y	Y	Y	Y	Y	Y	Y			2015-06-30	2	3	EX4	E6	7	Y	-	-	BROKEN UP	-	-	-	-
2015-06-30	2	3	CONT4	F6	9	Y	-	-	BROKEN UP	-	-	-	-			2015-06-30	2	3	EX4	F6	9	Y	-	-	BROKEN UP	-	-	-	-
2015-06-30	2	3	CONT4	G6	9	Y	-	-	BROKEN UP	-	-	-	-			2015-06-30	2	3	EX4	G6	9	Y	-	-	BROKEN UP	-	-	-	-
2015-06-30	2	3	CONT4	H6	9	Y	-	-	BROKEN UP	-	-	-	-			2015-06-30	2	3	EX4	H6	9	Y	-	-	BROKEN UP	-	-	-	-
2015-06-30	2	3	CONT5	A1	9	Y	-	-	BROKEN UP	-	-	-	-			2015-06-30	2	3	EX5	A1	9	Y	-	-	BROKEN UP	-	-	-	-
2015-06-30	2	3	CONT5	B1	9	Y	-	-	BROKEN UP	-	-	-	-			2015-06-30	2	3	EX5	B1	PREZOEA	-	Y	SHORT FORWARD	Y	N	Y	IMPAIRED	N
2015-06-30	2	3	CONT5	C1	6	Y	-	-	BROKEN UP	-	-	-	-			2015-06-30	2	3	EX5	C1	MISSING	-	-	-	-	-	-	-	-
2015-06-30	2	3	CONT5	D1	9	Y	-	-	BROKEN UP	-	-	-	-			2015-06-30	2	3	EX5	D1	9	Y	-	-	BROKEN UP	-	-	-	-
2015-06-30	2	3	CONT5	E1	9	Y	-	-	BROKEN UP	-	-	-	-			2015-06-30	2	3	EX5	E1	9	Y	-	-	BROKEN UP	-	-	-	-
2015-06-30	2	3	CONT5	F1	7	Y	-	-	BROKEN UP	-	-	-	-			2015-06-30	2	3	EX5	F1	9	Y	-	-	BROKEN UP	-	-	-	-
2015-06-30	2	3	CONT5	G1	9	Y	-	-	BROKEN UP	-	-	-	-			2015-06-30	2	3	EX5	G1	9	Y	-	-	BROKEN UP	-	-	-	-
2015-06-30	2	3	CONT5	H1	7	Y	-	-	BROKEN UP	-	-	-	-			2015-06-30	2	3	EX5	H1	ZOEA	-	Y	Y	Y	Y	Y	Y	Y
2015-06-30	2	3	CONT5	A2	6	Y	-	-	BROKEN UP	-	-	-	-			2015-06-30	2	3	EX5	A2	ZOEA	-	Y	Y	Y	-	Y	Y	Y
2015-06-30	2	3	CONT5	B2	9	Y	-	-	BROKEN UP	-	-	-	-			2015-06-30	2	3	EX5	B2	ZOEA	-	Y	Y	Y	Y	Y	Y	Y
2015-06-30	2	3	CONT5	C2	7	Y	-	-	BROKEN UP	-	-	-	-			2015-06-30	2	3	EX5	C2	9	Y	-	-	BROKEN UP	-	-	-	-
2015-06-30	2	3	CONT5	D2	9	Y	-	-	BROKEN UP	-	-	-	-			2015-06-30	2	3	EX5	D2	9	Y	-	-	BROKEN UP	-	-	-	-
2015-06-30	2	3	CONT5	E2	ZOEA	-	Y	Y	Y	Y	Y	Y	Y			2015-06-30	2	3	EX5	E2	9	Y	-	-	BROKEN UP	-	-	-	-
2015-06-30	2	3	CONT5	F2	7	Y	-	-	BROKEN UP	-	-	-	-			2015-06-30	2	3	EX5	F2	ZOEA	-	Y	Y	Y	Y	Y	Y	Y
2015-06-30	2	3	CONT5	G2	7	Y	-	-	BROKEN UP	-	-	-	-			2015-06-30	2	3	EX5	G2	9	Y	-	-	BROKEN UP	-	-	-	-
2015-06-30	2	3	CONT5	H2	6	Y	-	-	BROKEN UP	-	-	-	-			2015-06-30	2	3	EX5	H2	9	Y	-	-	BROKEN UP	-	-	-	-
2015-06-30	2	3	CONT5	A3	7	Y	-	-	BROKEN UP	-	-	-	-			2015-06-30	2	3	EX5	A3	9	Y	-	-	BROKEN UP	-	-	-	-
2015-06-30	2	3	CONT5	B3	7	Y	-	-	BROKEN UP	-	-	-	-			2015-06-30	2	3	EX5	B3	9	Y	-	-	BROKEN UP	-	-	-	-
2015-06-30	2	3	CONT5	C3	6	Y	-	-	BROKEN UP	-	-	-	-			2015-06-30	2	3	EX5	C3	ZOEA	-	Y	Y	Y	Y	Y	Y	Y
2015-06-30	2	3	CONT5	D3	ZOEA	-	Y	Y	Y	Y	Y	Y	Y			2015-06-30	2	3	EX5	D3	ZOEA	-	Y	Y	Y	Y	Y	Y	Y
2015-06-30	2	3	CONT5	E3	9	Y	-	-	BROKEN UP	-	-	-	-			2015-06-30	2	3	EX5	E3	9	Y	-	-	BROKEN UP	-	-	-	-
2015-06-30	2	3	CONT5	F3	6	Y	-	-	BROKEN UP	-	-	-	-			2015-06-30	2	3	EX5	F3	PREZOEA	-	Y	N	Y	N	Y	IMPAIRED	N
2015-06-30	2	3	CONT5	G3	PREZOEA	-	Y	N	Y	N	Y	N	Y			2015-06-30	2	3	EX5	G3	9	Y	-	-	BROKEN UP	-	-	-	-
2015-06-30	2	3	CONT5	H3	9	Y	-	-	BROKEN UP	-	-	-	-			2015-06-30	2	3	EX5	H3	ZOEA	-	Y	Y	Y	Y	Y	Y	Y
2015-06-30	2	3	CONT5	A4	9	Y	-	-	BROKEN UP	-	-	-	-			2015-06-30	2	3	EX5	A4	9	Y	-	-	BROKEN UP	-	-	-	-
2015-06-30	2	3	CONT5	B4	9	Y	-	-	BROKEN UP	-	-	-	-			2015-06-30	2	3	EX5	B4	9	Y	-	-	BROKEN UP	-	-	-	-
2015-06-30	2	3	CONT5	C4	9	Y	-	-	BROKEN UP	-	-	-	-			2015-06-30	2	3	EX5	C4	9	Y	-	-	BROKEN UP	-	-	-	-
2015-06-30	2	3	CONT5	D4	6	Y	-	-	BROKEN UP	-	-	-	-			2015-06-30	2	3	EX5	D4	9	Y	-	-	BROKEN UP	-	-	-	-
2015-06-30	2	3	CONT5	E4	7	Y	-	-	BROKEN UP	-	-	-	-			2015-06-30	2	3	EX5	E4	ZOEA	-	Y	Y	Y	Y	Y	Y	Y
2015-06-30	2	3	CONT5	F4	PREZOEA	-	Y	SHORT	Y	N	Y	IMPAIRED	N			2015-06-30	2	3	EX5	F4	9	Y	-	-	BROKEN UP	-	-	-	-
2015-06-30	2	3	CONT5	G4	6	Y	-	-	BROKEN UP	-	-	-	-			2015-06-30	2	3	EX5	G4	ZOEA	-	Y	Y	Y	Y	Y	Y	Y
2015-06-30	2	3	CONT5	H4	7	Y	-	-	BROKEN UP	-	-	-	-			2015-06-30	2	3	EX5	H4	9	Y	-	-	BROKEN UP	-	-	-	-
2015-06-30	2	3	CONT5	A5	9	Y	-	-	BROKEN UP	-	-	-	-			2015-06-30	2	3	EX5	A5	9	Y	-	-	BROKEN UP	-	-	-	-
2015-06-30	2	3	CONT5	B5	9	Y	-	-	BROKEN UP	-	-	-	-			2015-06-30	2	3	EX5	B5	ZOEA	-	-	-	-	-	-	-	-
2015-06-30	2	3	CONT5	C5	9	Y	-	-	BROKEN UP	-	-	-	-			2015-06-30	2	3	EX5	C5	9	Y	-	-	BROKEN UP	-	-	-	-
2015-06-30	2	3	CONT5	D5	?	Y	-	-	UNDETERMINED	-	-	-	-			2015-06-30	2	3	EX5	D5	ZOEA	-	Y	Y	Y	Y	Y	Y	Y
2015-06-30	2	3	CONT5	E5	9	Y	-	-	BROKEN UP	-	-	-	-			2015-06-30	2	3	EX5	E5	9	Y	-	-	BROKEN UP	-	-	-	-
2015-06-30	2	3	CONT5	F5	7	Y	-	-	BROKEN UP	-	-	-	-			2015-06-30	2	3	EX5	F5	9	Y	-	-	BROKEN UP	-	-	-	-
2015-06-30	2	3	CONT5	G5	9	Y	-	-	BROKEN UP	-	-	-	-			2015-06-30	2	3	EX5	G5	9	Y	-	-	BROKEN UP	-	-	-	-
2015-06-30	2	3	CONT5	H5	MISSING	-	-	-	-	-	-	-	-			2015-06-30	2	3	EX5	H5	9	Y	-	-	BROKEN UP	-	-	-	-
2015-06-30	2	3	CONT5	A6	?	Y	-	-	UNDETERMINED	-	-	-	-			2015-06-30	2	3	EX5	A6	MISSING	-	-	-	-	-	-	-	-
2015-06-30	2	3	CONT5	B6	7	Y	-	-	BROKEN UP	-	-	-	-			2015-06-30	2	3	EX5	B6	9	Y	-	-	BROKEN UP	-	-	-	-
2015-06-30	2	3	CONT5	C6	9	Y	-	-	BROKEN UP	-	-	-	-			2015-06-30	2	3	EX5	C6	9	Y	-	-	BROKEN UP	-	-	-	-
2015-06-30	2	3	CONT5	D6	9	Y	-	-	BROKEN UP	-	-	-	-			2015-06-30	2	3	EX5	D6	9	Y	-	-	BROKEN UP	-	-	-	-
2015-06-30	2	3	CONT5	E6	ZOEA	-	Y	Y	Y	Y	Y	Y	Y			2015-06-30	2	3	EX5	E6	9	Y	-	-	BROKEN UP	-	-	-	-
2015-06-30	2	3	CONT5	F6	9	Y	-	-	BROKEN UP	-	-	-	-			2015-06-30	2	3	EX5	F6	9	Y	-	-	BROKEN UP	-	-	-	-
2015-06-30	2	3	CONT5	G6	9	Y	-	-	BROKEN UP	-	-	-	-			2015-06-30	2		EX5	G6	9	Y	-	-	BROKEN UP	-	-	-	-
2015-06-30	2	3	CONT5	H6	9	Y	-	-	BROKEN UP	-	-	-	-			2015-06-30	2		EX5	H6	9	Y	-	-	BROKEN UP	-	-	-	-

## Sheet: Replicate 3
Date	Replicate #	Day	Plate ID	Well ID	Stage	Cloudy/Dark	Heart beat	Dorsal Spine	Eyes (Full & Bilaterally symmetrical)	Rostrum	Telson	Swimming ablility	Lateral Spines			Date	Replicate #	Day	Plate ID	Well ID	Stage	Cloudy/Dark	Heart beat	Dorsal Spine	Eyes (Full & Bilaterally symmetrical)	Rostrum	Telson	Swimming ablility	Lateral Spines
2015-06-29	3	1	CONT1	A1	5	Y	-	-	NOT PRESENT	-	-	-	-			2015-06-29	3	1	EX1	A1	5	Y	-	-	NOT PRESENT	-	-	-	-
2015-06-29	3	1	CONT1	B1	6	Y	-	-	BROKEN UP	-	-	-	-			2015-06-29	3	1	EX1	B1	5	Y	-	-	NOT PRESENT	-	-	-	-
2015-06-29	3	1	CONT1	C1	6	Y	-	-	BROKEN UP	-	-	-	-			2015-06-29	3	1	EX1	C1	5	Y	-	-	NOT PRESENT	-	-	-	-
2015-06-29	3	1	CONT1	D1	5	Y	-	-	NOT PRESENT	-	-	-	-			2015-06-29	3	1	EX1	D1	5	Y	-	-	NOT PRESENT	-	-	-	-
2015-06-29	3	1	CONT1	E1	5	Y	-	-	NOT PRESENT	-	-	-	-			2015-06-29	3	1	EX1	E1	7	-	-	-	Y	-	-	-	-
2015-06-29	3	1	CONT1	F1	5	Y	-	-	NOT PRESENT	-	-	-	-			2015-06-29	3	1	EX1	F1	5	Y	-	-	NOT PRESENT	-	-	-	-
2015-06-29	3	1	CONT1	G1	5	Y	-	-	NOT PRESENT	-	-	-	-			2015-06-29	3	1	EX1	G1	7	-	-	-	Y	-	-	-	-
2015-06-29	3	1	CONT1	H1	5	Y	-	-	NOT PRESENT	-	-	-	-			2015-06-29	3	1	EX1	H1	6	-	-	-	Y	-	-	-	-
2015-06-29	3	1	CONT1	A2	5	Y	-	-	NOT PRESENT	-	-	-	-			2015-06-29	3	1	EX1	A2	5	Y	-	-	NOT PRESENT	-	-	-	-
2015-06-29	3	1	CONT1	B2	7	-	-	-	Y	-	-	-	-			2015-06-29	3	1	EX1	B2	7	-	-	-	Y	-	-	-	-
2015-06-29	3	1	CONT1	C2	6	Y	-	-	BROKEN UP	-	-	-	-			2015-06-29	3	1	EX1	C2	6	Y	-	-	BROKEN UP	-	-	-	-
2015-06-29	3	1	CONT1	D2	7	-	-	-	Y	-	-	-	-			2015-06-29	3	1	EX1	D2	7	-	-	-	Y	-	-	-	-
2015-06-29	3	1	CONT1	E2	6	Y	-	-	BROKEN UP	-	-	-	-			2015-06-29	3	1	EX1	E2	5	Y	-	-	NOT PRESENT	-	-	-	-
2015-06-29	3	1	CONT1	F2	7	-	-	-	Y	-	-	-	-			2015-06-29	3	1	EX1	F2	6	-	-	-	Y	-	-	-	-
2015-06-29	3	1	CONT1	G2	7	-	-	-	Y	-	-	-	-			2015-06-29	3	1	EX1	G2	MISSING	-	-	-	-	-	-	-	-
2015-06-29	3	1	CONT1	H2	6	Y	-	-	BROKEN UP	-	-	-	-			2015-06-29	3	1	EX1	H2	6	-	-	-	Y	-	-	-	-
2015-06-29	3	1	CONT1	A3	6	Y	-	-	BROKEN UP	-	-	-	-			2015-06-29	3	1	EX1	A3	MISSING	-	-	-	-	-	-	-	-
2015-06-29	3	1	CONT1	B3	6	Y	-	-	BROKEN UP	-	-	-	-			2015-06-29	3	1	EX1	B3	6	Y	-	-	BROKEN UP	-	-	-	-
2015-06-29	3	1	CONT1	C3	6	Y	-	-	BROKEN UP	-	-	-	-			2015-06-29	3	1	EX1	C3	6	Y	-	-	BROKEN UP	-	-	-	-
2015-06-29	3	1	CONT1	D3	7	-	-	-	Y	-	-	-	-			2015-06-29	3	1	EX1	D3	5	Y	-	-	NOT PRESENT	-	-	-	-
2015-06-29	3	1	CONT1	E3	5	Y	-	-	NOT PRESENT	-	-	-	-			2015-06-29	3	1	EX1	E3	5	Y	-	-	NOT PRESENT	-	-	-	-
2015-06-29	3	1	CONT1	F3	6	Y	-	-	BROKEN UP	-	-	-	-			2015-06-29	3	1	EX1	F3	6	-	-	-	Y	-	-	-	-
2015-06-29	3	1	CONT1	G3	5	Y	-	-	NOT PRESENT	-	-	-	-			2015-06-29	3	1	EX1	G3	6	-	-	-	Y	-	-	-	-
2015-06-29	3	1	CONT1	H3	6	-	-	-	Y	-	-	-	-			2015-06-29	3	1	EX1	H3	5	Y	-	-	NOT PRESENT	-	-	-	-
2015-06-29	3	1	CONT1	A4	6	Y	-	-	BROKEN UP	-	-	-	-			2015-06-29	3	1	EX1	A4	5	Y	-	-	NOT PRESENT	-	-	-	-
2015-06-29	3	1	CONT1	B4	7	-	-	-	Y	-	-	-	-			2015-06-29	3	1	EX1	B4	7	-	-	-	Y	-	-	-	-
2015-06-29	3	1	CONT1	C4	7	-	-	-	Y	-	-	-	-			2015-06-29	3	1	EX1	C4	5	Y	-	-	NOT PRESENT	-	-	-	-
2015-06-29	3	1	CONT1	D4	5	Y	-	-	NOT PRESENT	-	-	-	-			2015-06-29	3	1	EX1	D4	7	-	-	-	Y	-	-	-	-
2015-06-29	3	1	CONT1	E4	5	Y	-	-	NOT PRESENT	-	-	-	-			2015-06-29	3	1	EX1	E4	5	Y	-	-	NOT PRESENT	-	-	-	-
2015-06-29	3	1	CONT1	F4	6	Y	-	-	BROKEN UP	-	-	-	-			2015-06-29	3	1	EX1	F4	5	Y	-	-	NOT PRESENT	-	-	-	-
2015-06-29	3	1	CONT1	G4	6	-	-	-	Y	-	-	-	-			2015-06-29	3	1	EX1	G4	5	Y	-	-	NOT PRESENT	-	-	-	-
2015-06-29	3	1	CONT1	H4	6	Y	-	-	BROKEN UP	-	-	-	-			2015-06-29	3	1	EX1	H4	6	Y	-	-	BROKEN UP	-	-	-	-
2015-06-29	3	1	CONT1	A5	5	Y	-	-	NOT PRESENT	-	-	-	-			2015-06-29	3	1	EX1	A5	6	Y	-	-	BROKEN UP	-	-	-	-
2015-06-29	3	1	CONT1	B5	5	Y	-	-	NOT PRESENT	-	-	-	-			2015-06-29	3	1	EX1	B5	7	-	-	-	Y	-	-	-	-
2015-06-29	3	1	CONT1	C5	7	-	-	-	Y	-	-	-	-			2015-06-29	3	1	EX1	C5	5	Y	-	-	NOT PRESENT	-	-	-	-
2015-06-29	3	1	CONT1	D5	7	-	-	-	Y	-	-	-	-			2015-06-29	3	1	EX1	D5	7	-	-	-	Y	-	-	-	-
2015-06-29	3	1	CONT1	E5	5	Y	-	-	NOT PRESENT	-	-	-	-			2015-06-29	3	1	EX1	E5	6	-	-	-	Y	-	-	-	-
2015-06-29	3	1	CONT1	F5	6	Y	-	-	BROKEN UP	-	-	-	-			2015-06-29	3	1	EX1	F5	5	Y	-	-	NOT PRESENT	-	-	-	-
2015-06-29	3	1	CONT1	G5	6	Y	-	-	BROKEN UP	-	-	-	-			2015-06-29	3	1	EX1	G5	MISSING	-	-	-	-	-	-	-	-
2015-06-29	3	1	CONT1	H5	7	-	-	-	Y	-	-	-	-			2015-06-29	3	1	EX1	H5	MISSING	-	-	-	-	-	-	-	-
2015-06-29	3	1	CONT1	A6	6	Y	-	-	BROKEN UP	-	-	-	-			2015-06-29	3	1	EX1	A6	MISSING	-	-	-	-	-	-	-	-
2015-06-29	3	1	CONT1	B6	5	Y	-	-	NOT PRESENT	-	-	-	-			2015-06-29	3	1	EX1	B6	MISSING	-	-	-	-	-	-	-	-
2015-06-29	3	1	CONT1	C6	5	Y	-	-	NOT PRESENT	-	-	-	-			2015-06-29	3	1	EX1	C6	7	Y	-	-	BROKEN UP	-	-	-	-
2015-06-29	3	1	CONT1	D6	5	Y	-	-	NOT PRESENT	-	-	-	-			2015-06-29	3	1	EX1	D6	6	Y	-	-	BROKEN UP	-	-	-	-
2015-06-29	3	1	CONT1	E6	5	Y	-	-	NOT PRESENT	-	-	-	-			2015-06-29	3	1	EX1	E6	5	Y	-	-	NOT PRESENT	-	-	-	-
2015-06-29	3	1	CONT1	F6	7	-	-	-	Y	-	-	-	-			2015-06-29	3	1	EX1	F6	5	Y	-	-	NOT PRESENT	-	-	-	-
2015-06-29	3	1	CONT1	G6	6	Y	-	-	BROKEN UP	-	-	-	-			2015-06-29	3	1	EX1	G6	5	Y	-	-	NOT PRESENT	-	-	-	-
2015-06-30	3	1	CONT1	H6	7	-	-	-	Y	-	-	-	-			2015-06-29	3	1	EX1	H6	5	Y	-	-	NOT PRESENT	-	-	-	-
2015-06-30	3	2	CONT2	A1	5	Y	-	-	NOT PRESENT	-	-	-	-			2015-06-30	3	2	EX2	A1	8	-	-	-	Y	-	-	-	-
2015-06-30	3	2	CONT2	B1	9	-	Y	-	Y	-	-	-	-			2015-06-30	3	2	EX2	B1	5	Y	-	-	NOT PRESENT	-	-	-	-
2015-06-30	3	2	CONT2	C1	6	-	-	-	Y	-	-	-	-			2015-06-30	3	2	EX2	C1	5	Y	-	-	NOT PRESENT	-	-	-	-
2015-06-30	3	2	CONT2	D1	6	Y	-	-	BROKEN UP	-	-	-	-			2015-06-30	3	2	EX2	D1	9	-	Y	-	Y	-	-	-	-
2015-06-30	3	2	CONT2	E1	8	-	-	-	Y	-	-	-	-			2015-06-30	3	2	EX2	E1	9	-	Y	-	Y	-	-	-	-
2015-06-30	3	2	CONT2	F1	8	-	-	-	Y	-	-	-	-			2015-06-30	3	2	EX2	F1	9	-	Y	-	Y	-	-	-	-
2015-06-30	3	2	CONT2	G1	8	-	-	-	Y	-	-	-	-			2015-06-30	3	2	EX2	G1	5	Y	-	-	NOT PRESENT	-	-	-	-
2015-06-30	3	2	CONT2	H1	?	Y	-	-	-	-	-	-	-			2015-06-30	3	2	EX2	H1	?	Y	-	-	UNDETERMINED	-	-	-	-
2015-06-30	3	2	CONT2	A2	8	-	-	-	Y	-	-	-	-			2015-06-30	3	2	EX2	A2	6	Y	-	-	BROKEN UP	-	-	-	-
2015-06-30	3	2	CONT2	B2	8	-	-	-	Y	-	-	-	-			2015-06-30	3	2	EX2	B2	8	-	-	-	Y	-	-	-	-
2015-06-30	3	2	CONT2	C2	?	Y	-	-	UNDETERMINED	-	-	-	-			2015-06-30	3	2	EX2	C2	6	Y	-	-	BROKEN UP	-	-	-	-
2015-06-30	3	2	CONT2	D2	5	Y	-	-	NOT PRESENT	-	-	-	-			2015-06-30	3	2	EX2	D2	5	Y	-	-	NOT PRESENT	-	-	-	-
2015-06-30	3	2	CONT2	E2	6	Y	-	-	BROKEN UP	-	-	-	-			2015-06-30	3	2	EX2	E2	?	Y	-	-	UNDETERMINED	-	-	-	-
2015-06-30	3	2	CONT2	F2	5	Y	-	-	NOT PRESENT	-	-	-	-			2015-06-30	3	2	EX2	F2	?	Y	-	-	UNDETERMINED	-	-	-	-
2015-06-30	3	2	CONT2	G2	6	Y	-	-	BROKEN UP	-	-	-	-			2015-06-30	3	2	EX2	G2	5	Y	-	-	NOT PRESENT	-	-	-	-
2015-06-30	3	2	CONT2	H2	8	-	-	-	Y	-	-	-	-			2015-06-30	3	2	EX2	H2	5	Y	-	-	NOT PRESENT	-	-	-	-
2015-06-30	3	2	CONT2	A3	6	Y	-	-	BROKEN UP	-	-	-	-			2015-06-30	3	2	EX2	A3	6	Y	-	-	BROKEN UP	-	-	-	-
2015-06-30	3	2	CONT2	B3	9	-	Y	-	Y	-	-	-	-			2015-06-30	3	2	EX2	B3	5	Y	-	-	NOT PRESENT	-	-	-	-
2015-06-30	3	2	CONT2	C3	5	Y	-	-	NOT PRESENT	-	-	-	-			2015-06-30	3	2	EX2	C3	5	Y	-	-	NOT PRESENT	-	-	-	-
2015-06-30	3	2	CONT2	D3	6	Y	-	-	BROKEN UP	-	-	-	-			2015-06-30	3	2	EX2	D3	?	Y	-	-	UNDETERMINED	-	-	-	-
2015-06-30	3	2	CONT2	E3	5	Y	-	-	NOT PRESENT	-	-	-	-			2015-06-30	3	2	EX2	E3	8	-	-	-	Y	-	-	-	-
2015-06-30	3	2	CONT2	F3	6	Y	-	-	BROKEN UP	-	-	-	-			2015-06-30	3	2	EX2	F3	9	-	Y	-	Y	-	-	-	-
2015-06-30	3	2	CONT2	G3	8	-	-	-	Y	-	-	-	-			2015-06-30	3	2	EX2	G3	?	Y	-	-	UNDETERMINED	-	-	-	-
2015-06-30	3	2	CONT2	H3	5	Y	-	-	NOT PRESENT	-	-	-	-			2015-06-30	3	2	EX2	H3	5	Y	-	-	NOT PRESENT	-	-	-	-
2015-06-30	3	2	CONT2	A4	6	Y	-	-	BROKEN UP	-	-	-	-			2015-06-30	3	2	EX2	A4	6	Y	-	-	BROKEN UP	-	-	-	-
2015-06-30	3	2	CONT2	B4	6	Y	-	-	BROKEN UP	-	-	-	-			2015-06-30	3	2	EX2	B4	?	Y	-	-	UNDETERMINED	-	-	-	-
2015-06-30	3	2	CONT2	C4	5	Y	-	-	NOT PRESENT	-	-	-	-			2015-06-30	3	2	EX2	C4	9	-	Y	-	Y	-	-	-	-
2015-06-30	3	2	CONT2	D4	6	Y	-	-	BROKEN UP	-	-	-	-			2015-06-30	3	2	EX2	D4	6	Y	-	-	BROKEN UP	-	-	-	-
2015-06-30	3	2	CONT2	E4	9	-	Y	-	Y	-	-	-	-			2015-06-30	3	2	EX2	E4	MISSING	-	-	-	-	-	-	-	-
2015-06-30	3	2	CONT2	F4	5	Y	-	-	NOT PRESENT	-	-	-	-			2015-06-30	3	2	EX2	F4	5	Y	-	-	NOT PRESENT	-	-	-	-
2015-06-30	3	2	CONT2	G4	6	Y	-	-	BROKEN UP	-	-	-	-			2015-06-30	3	2	EX2	G4	?	Y			UNDETERMINED
2015-06-30	3	2	CONT2	H4	5	Y	-	-	NOT PRESENT	-	-	-	-			2015-06-30	3	2	EX2	H4	5	Y	-	-	NOT PRESENT	-	-	-	-
2015-06-30	3	2	CONT2	A5	6	Y	-	-	BROKEN UP	-	-	-	-			2015-06-30	3	2	EX2	A5	6	Y	-	-	BROKEN UP	-	-	-	-
2015-06-30	3	2	CONT2	B5	?	Y	-	-	UNDETERMINED	-	-	-	-			2015-06-30	3	2	EX2	B5	5	Y	-	-	NOT PRESENT	-	-	-	-
2015-06-30	3	2	CONT2	C5	7	-	-	-	Y	-	-	-	-			2015-06-30	3	2	EX2	C5	5	Y	-	-	NOT PRESENT	-	-	-	-
2015-06-30	3	2	CONT2	D5	9	-	-	-	Y	-	-	-	-			2015-06-30	3	2	EX2	D5	9	-	Y	-	Y	-	-	-	-
2015-06-30	3	2	CONT2	E5	?	Y	-	-	UNDETERMINED	-	-	-	-			2015-06-30	3	2	EX2	E5	5	7	-	-	NOT PRESENT	-	-	-	-
2015-06-30	3	2	CONT2	F5	5	Y	-	-	NOT PRESENT	-	-	-	-			2015-06-30	3	2	EX2	F5	9	-	Y	-	Y	-	-	-	-
2015-06-30	3	2	CONT2	G5	6	Y	-	-	BROKEN UP	-	-	-	-			2015-06-30	3	2	EX2	G5	9	-	Y	-	Y	-	-	-	-
2015-06-30	3	2	CONT2	H5	5	Y	-	-	NOT PRESENT	-	-	-	-			2015-06-30	3	2	EX2	H5	8	-	-	-	Y	-	-	-	-
2015-06-30	3	2	CONT2	A6	8	-	-	-	Y	-	-	-	-			2015-06-30	3	2	EX2	A6	7	-	-	-	Y	-	-	-	-
2015-06-30	3	2	CONT2	B6	5	Y	-	-	NOT PRESENT	-	-	-	-			2015-06-30	3	2	EX2	B6	9	-	Y	-	Y	-	-	-	-
2015-06-30	3	2	CONT2	C6	5	Y	-	-	NOT PRESENT	-	-	-	-			2015-06-30	3	2	EX2	C6	9	-	Y	-	Y	-	-	-	-
2015-06-30	3	2	CONT2	D6	8	-	-	-	Y	-	-	-	-			2015-06-30	3	2	EX2	D6	6	Y	-	-	BROKEN UP	-	-	-	-
2015-06-30	3	2	CONT2	E6	6	Y	-	-	BROKEN UP	-	-	-	-			2015-06-30	3	2	EX2	E6	6	Y	-	-	BROKEN UP	-	-	-	-
2015-06-30	3	2	CONT2	F6	8	-	-	-	Y	-	-	-	-			2015-06-30	3	2	EX2	F6	5	Y	-	-	NOT PRESENT	-	-	-	-
2015-06-30	3	2	CONT2	G6	7	-	-	-	Y	-	-	-	-			2015-06-30	3	2	EX2	G6	6	Y	-	-	BROKEN UP	-	-	-	-
2015-07-01	3	2	CONT2	H6	?	Y	-	-	UNDETERMINED	-	-	-	-			2015-06-30	3	2	EX2	H6	5	Y	-	-	NOT PRESENT	-	-	-	-
2015-07-01	3	3	CONT3	A1	?	Y	-	-	UNDETERMINED	-	-	-	-			2015-07-01	3	3	EX3	A1	9	-	Y	-	Y	-	-	-	-
2015-07-01	3	3	CONT3	B1	?	Y	-	-	UNDETERMINED	-	-	-	-			2015-07-01	3	3	EX3	B1	6	Y	-	-	BROKEN UP	-	-	-	-
2015-07-01	3	3	CONT3	C1	?	Y	-	-	UNDETERMINED	-	-	-	-			2015-07-01	3	3	EX3	C1	5	Y	-	-	NOT PRESENT	-	-	-	-
2015-07-01	3	3	CONT3	D1	9	-	Y	-	Y	-	-	-	-			2015-07-01	3	3	EX3	D1	?	Y	-	-	UNDETERMINED	-	-	-	-
2015-07-01	3	3	CONT3	E1	6	Y	-	-	BROKEN UP	-	-	-	-			2015-07-01	3	3	EX3	E1	?	Y	-	-	UNDETERMINED	-	-	-	-
2015-07-01	3	3	CONT3	F1	9	-	Y	-	Y	-	-	-	-			2015-07-01	3	3	EX3	F1	MISSING	-	-	-	-	-	-	-	-
2015-07-01	3	3	CONT3	G1	9	-	Y	-	Y	-	-	-	-			2015-07-01	3	3	EX3	G1	?	Y	-	-	UNDETERMINED	-	-	-	-
2015-07-01	3	3	CONT3	H1	?	Y	-	-	UNDETERMINED	-	-	-	-			2015-07-01	3	3	EX3	H1	6	Y	-	-	BROKEN UP	-	-	-	-
2015-07-01	3	3	CONT3	A2	?	Y	-	-	UNDETERMINED	-	-	-	-			2015-07-01	3	3	EX3	A2	6	Y	-	-	BROKEN UP	-	-	-	-
2015-07-01	3	3	CONT3	B2	9	-	Y	-	Y	-	-	-	-			2015-07-01	3	3	EX3	B2	?	Y	-	-	UNDETERMINED	-	-	-	-
2015-07-01	3	3	CONT3	C2	9	-	Y	-	Y	-	-	-	-			2015-07-01	3	3	EX3	C2	5	Y	-	-	NOT PRESENT	-	-	-	-
2015-07-01	3	3	CONT3	D2	?	Y	-	-	UNDETERMINED	-	-	-	-			2015-07-01	3	3	EX3	D2	9	-	Y	-	Y	-	-	-	-
2015-07-01	3	3	CONT3	E2	?	Y	-	-	UNDETERMINED	-	-	-	-			2015-07-01	3	3	EX3	E2	?	Y	-	-	UNDETERMINED	-	-	-	-
2015-07-01	3	3	CONT3	F2	?	Y	-	-	UNDETERMINED	-	-	-	-			2015-07-01	3	3	EX3	F2	?	Y	-	-	UNDETERMINED	-	-	-	-
2015-07-01	3	3	CONT3	G2	?	Y	-	-	UNDETERMINED	-	-	-	-			2015-07-01	3	3	EX3	G2	?	Y	-	-	UNDETERMINED	-	-	-	-
2015-07-01	3	3	CONT3	H2	?	Y	-	-	UNDETERMINED	-	-	-	-			2015-07-01	3	3	EX3	H2	9	-	Y	-	Y	-	-	-	-
2015-07-01	3	3	CONT3	A3	7	Y	-	-	BROKEN UP	-	-	-	-			2015-07-01	3	3	EX3	A3	9	-	Y	-	Y	-	-	-	-
2015-07-01	3	3	CONT3	B3	7	Y	-	-	BROKEN UP	-	-	-	-			2015-07-01	3	3	EX3	B3	?	Y	-	-	UNDETERMINED	-	-	-	-
2015-07-01	3	3	CONT3	C3	5	Y	-	-	NOT PRESENT	-	-	-	-			2015-07-01	3	3	EX3	C3	7	Y	-	-	BROKEN UP	-	-	-	-
2015-07-01	3	3	CONT3	D3	9	-	Y	-	Y	-	-	-	-			2015-07-01	3	3	EX3	D3	?	Y	-	-	UNDETERMINED	-	-	-	-
2015-07-01	3	3	CONT3	E3	?	Y	-	-	UNDETERMINED	-	-	-	-			2015-07-01	3	3	EX3	E3	?	Y	-	-	UNDETERMINED	-	-	-	-
2015-07-01	3	3	CONT3	F3	9	-	Y	-	Y	-	-	-	-			2015-07-01	3	3	EX3	F3	9	-	Y	-	Y	-	-	-	-
2015-07-01	3	3	CONT3	G3	5	Y	-	-	UNDETERMINED	-	-	-	-			2015-07-01	3	3	EX3	G3	9	-	Y	-	Y	-	-	-	-
2015-07-01	3	3	CONT3	H3	7	-	-	-	Y	-	-	-	-			2015-07-01	3	3	EX3	H3	6	Y	-	-	BROKEN UP	-	-	-	-
2015-07-01	3	3	CONT3	A4	6	Y	-	-	BROKEN UP	-	-	-	-			2015-07-01	3	3	EX3	A4	?	Y	-	-	UNDETERMINED	-	-	-	-
2015-07-01	3	3	CONT3	B4	?	Y	-	-	UNDETERMINED	-	-	-	-			2015-07-01	3	3	EX3	B4	9	-	Y	-	Y	-	-	-	-
2015-07-01	3	3	CONT3	C4	9	-	Y	-	Y	-	-	-	-			2015-07-01	3	3	EX3	C4	9	-	Y	-	Y	-	-	-	-
2015-07-01	3	3	CONT3	D4	?	Y	-	-	UNDETERMINED	-	-	-	-			2015-07-01	3	3	EX3	D4	?	Y	-	-	UNDETERMINED	-	-	-	-
2015-07-01	3	3	CONT3	E4	9	-	Y	-	Y	-	-	-	-			2015-07-01	3	3	EX3	E4	?	Y	-	-	UNDETERMINED	-	-	-	-
2015-07-01	3	3	CONT3	F4	?	Y	-	-	UNDETERMINED	-	-	-	-			2015-07-01	3	3	EX3	F4	?	Y	-	-	UNDETERMINED	-	-	-	-
2015-07-01	3	3	CONT3	G4	9	-	Y	-	Y	-	-	-	-			2015-07-01	3	3	EX3	G4	?	Y	-	-	BROKEN UP	-	-	-	-
2015-07-01	3	3	CONT3	H4	?	Y	-	-	UNDETERMINED	-	-	-	-			2015-07-01	3	3	EX3	H4	6	Y	-	-	UNDETERMINED	-	-	-	-
2015-07-01	3	3	CONT3	A5	5	Y	-	-	NOT PRESENT	-	-	-	-			2015-07-01	3	3	EX3	A5	?	Y	-	-	BROKEN UP	-	-	-	-
2015-07-01	3	3	CONT3	B5	6	Y	-	-	BROKEN UP	-	-	-	-			2015-07-01	3	3	EX3	B5	6	Y	-	-	-	-	-	-	-
2015-07-01	3	3	CONT3	C5	9	-	Y	-	Y	-	-	-	-			2015-07-01	3	3	EX3	C5	MISSING	-	-	-	UNDETERMINED	-	-	-	-
2015-07-01	3	3	CONT3	D5	9	-	Y	-	Y	-	-	-	-			2015-07-01	3	3	EX3	D5	?	Y	-	-	UNDETERMINED	-	-	-	-
2015-07-01	3	3	CONT3	E5	?	Y	-	-	UNDETERMINED	-	-	-	-			2015-07-01	3	3	EX3	E5	?	Y	-	-	-	-	-	-	-
2015-07-01	3	3	CONT3	F5	7	Y	-	-	BROKEN UP	-	-	-	-			2015-07-01	3	3	EX3	F5	MISSING	-	-	-	UNDETERMINED	-	-	-	-
2015-07-01	3	3	CONT3	G5	7	-	-	-	Y	-	-	-	-			2015-07-01	3	3	EX3	G5	?	Y	-	-	UNDETERMINED	-	-	-	-
2015-07-01	3	3	CONT3	H5	?	Y	-	-	UNDETERMINED	-	-	-	-			2015-07-01	3	3	EX3	H5	?	Y	-	-	UNDETERMINED	-	-	-	-
2015-07-01	3	3	CONT3	A6	5	Y	-	-	NOT PRESENT	-	-	-	-			2015-07-01	3	3	EX3	A6	?	Y	-	-	UNDETERMINED	-	-	-	-
2015-07-01	3	3	CONT3	B6	9	-	-	-	Y	-	-	-	-			2015-07-01	3	3	EX3	B6	?	Y	-	-	UNDETERMINED	-	-	-	-
2015-07-01	3	3	CONT3	C6	7	-	-	-	Y	-	-	-	-			2015-07-01	3	3	EX3	C6	?	Y	-	-	UNDETERMINED	-	-	-	-
2015-07-01	3	3	CONT3	D6	9	-	Y	-	Y	-	-	-	-			2015-07-01	3	3	EX3	D6	?	Y	-	-	UNDETERMINED	-	-	-	-
2015-07-01	3	3	CONT3	E6	7	Y	-	-	BROKEN UP	-	-	-	-			2015-07-01	3	3	EX3	E6	?	Y	-	-	UNDETERMINED	-	-	-	-
2015-07-01	3	3	CONT3	F6	6	Y	-	-	BROKEN UP	-	-	-	-			2015-07-01	3	3	EX3	F6	6	Y	-	-	BROKEN UP	-	-	-	-
2015-07-01	3	3	CONT3	G6	?	Y	-	-	UNDETERMINED	-	-	-	-			2015-07-01	3	3	EX3	G6	?	Y	-	-	UNDETERMINED	-	-	-	-
2015-07-02	3	3	CONT3	H6	?	Y	-	-	UNDETERMINED	-	-	-	-			2015-07-01	3	3	EX3	H6	7	Y	-	-	BROKEN UP	-	-	-	-
2015-07-02	3	4	CONT4	A1	?	Y	-	-	UNDETERMINED	-	-	-	-			2015-07-02	3	4	EX4	A1	ZOEA	-	Y	Y	Y	Y	Y	Y	Y
2015-07-02	3	4	CONT4	B1	?	Y	-	-	UNDETERMINED	-	-	-	-			2015-07-02	3	4	EX4	B1	?	Y	-	-	UNDETERMINED	-	-	-	-
2015-07-02	3	4	CONT4	C1	PREZOEA	-	Y	N	Y	N	Y	IMPAIRED	N			2015-07-02	3	4	EX4	C1	?	Y	-	-	UNDETERMINED	-	-	-	-
2015-07-02	3	4	CONT4	D1	?	Y	-	-	UNDETERMINED	-	-	-	-			2015-07-02	3	4	EX4	D1	?	Y	-	-	UNDETERMINED	-	-	-	-
2015-07-02	3	4	CONT4	E1	6	Y	-	-	BROKEN UP	-	-	-	-			2015-07-02	3	4	EX4	E1	?	Y	-	-	UNDETERMINED	-	-	-	-
2015-07-02	3	4	CONT4	F1	ZOEA	-	Y	Y	Y	Y	Y	Y	Y			2015-07-02	3	4	EX4	F1	ZOEA	-	Y	Y	Y	Y	Y	Y	Y
2015-07-02	3	4	CONT4	G1	?	Y	-	-	UNDETERMINED	-	-	-	-			2015-07-02	3	4	EX4	G1	5	Y	-	-	NOT PRESENT	-	-	-	-
2015-07-02	3	4	CONT4	H1	?	Y	-	-	UNDETERMINED	-	-	-	-			2015-07-02	3	4	EX4	H1	?	Y	-	-	UNDETERMINED	-	-	-	-
2015-07-02	3	4	CONT4	A2	PREZOEA	-	Y	N	Y	N	Y	IMPAIRED	N			2015-07-02	3	4	EX4	A2	MISSING	-	-	-	-	-	-	-	-
2015-07-02	3	4	CONT4	B2	ZOEA	-	Y	Y	Y	Y	Y	Y	Y			2015-07-02	3	4	EX4	B2	?	Y	-	-	UNDETERMINED	-	-	-	-
2015-07-02	3	4	CONT4	C2	?	Y	-	-	UNDETERMINED	-	-	-	-			2015-07-02	3	4	EX4	C2	?	Y	-	-	UNDETERMINED	-	-	-	-
2015-07-02	3	4	CONT4	D2	?	Y	-	-	UNDETERMINED	-	-	-	-			2015-07-02	3	4	EX4	D2	6	Y	-	-	BROKEN UP	-	-	-	-
2015-07-02	3	4	CONT4	E2	?	Y	-	-	UNDETERMINED	-	-	-	-			2015-07-02	3	4	EX4	E2	?	Y	-	-	UNDETERMINED	-	-	-	-
2015-07-02	3	4	CONT4	F2	6	Y	-	-	BROKEN UP	-	-	-	-			2015-07-02	3	4	EX4	F2	7	Y	-	-	BROKEN UP	-	-	-	-
2015-07-02	3	4	CONT4	G2	?	Y	-	-	UNDETERMINED	-	-	-	-			2015-07-02	3	4	EX4	G2	?	Y	-	-	UNDETERMINED	-	-	-	-
2015-07-02	3	4	CONT4	H2	9	-	Y	-	Y	-	-	-	-			2015-07-02	3	4	EX4	H2	?	Y	-	-	UNDETERMINED	-	-	-	-
2015-07-02	3	4	CONT4	A3	7	Y	-	-	BROKEN UP	-	-	-	-			2015-07-02	3	4	EX4	A3	?	Y	-	-	UNDETERMINED	-	-	-	-
2015-07-02	3	4	CONT4	B3	?	Y	-	-	UNDETERMINED	-	-	-	-			2015-07-02	3	4	EX4	B3	?	Y	-	-	UNDETERMINED	-	-	-	-
2015-07-02	3	4	CONT4	C3	9	Y	-	-	BROKEN UP	-	-	-	-			2015-07-02	3	4	EX4	C3	6	Y	-	-	BROKEN UP	-	-	-	-
2015-07-02	3	4	CONT4	D3	?	Y	-	-	UNDETERMINED	-	-	-	-			2015-07-02	3	4	EX4	D3	?	Y	-	-	UNDETERMINED	-	-	-	-
2015-07-02	3	4	CONT4	E3	9	Y	-	-	BROKEN UP	-	-	-	-			2015-07-02	3	4	EX4	E3	ZOEA	-	Y	Y	Y	Y	Y	IMPAIRED	Y	Likely injured when placed under microscope for examination. Abdomen was crushed imparing swimming ability
2015-07-02	3	4	CONT4	F3	ZOEA	-	Y	Y	Y	Y	Y	Y	Y			2015-07-02	3	4	EX4	F3	?	Y	-	-	UNDETERMINED	-	-	-	-
2015-07-02	3	4	CONT4	G3	?	Y	-	-	UNDETERMINED	-	-	-	-			2015-07-02	3	4	EX4	G3	6	Y	-	-	Y	-	-	-	-
2015-07-02	3	4	CONT4	H3	?	Y	-	-	UNDETERMINED	-	-	-	-			2015-07-02	3	4	EX4	H3	6	Y	-	-	BROKEN UP	-	-	-	-
2015-07-02	3	4	CONT4	A4	?	Y	-	-	UNDETERMINED	-	-	-	-			2015-07-02	3	4	EX4	A4	?	Y	-	-	UNDETERMINED	-	-	-	-
2015-07-02	3	4	CONT4	B4	?	Y	-	-	UNDETERMINED	-	-	-	-			2015-07-02	3	4	EX4	B4	MISSING	-	-	-	-	-	-	-	-
2015-07-02	3	4	CONT4	C4	?	Y	-	-	UNDETERMINED	-	-	-	-			2015-07-02	3	4	EX4	C4	?	Y	-	-	UNDETERMINED	-	-	-	-
2015-07-02	3	4	CONT4	D4	ZOEA	-	Y	Y	Y	Y	Y	Y	Y			2015-07-02	3	4	EX4	D4	9	-	Y	-	Y	-	-	-	-
2015-07-02	3	4	CONT4	E4	?	Y	-	-	UNDETERMINED	-	-	-	-			2015-07-02	3	4	EX4	E4	7	Y	-	-	Y	-	-	-	-
2015-07-02	3	4	CONT4	F4	PREZOEA	-	Y	N	Y	N	Y	IMPAIRED	N			2015-07-02	3	4	EX4	F4	ZOEA	-	Y	Y	Y	Y	Y	Y	Y
2015-07-02	3	4	CONT4	G4	?	Y	-	-	UNDETERMINED	-	-	-	-			2015-07-02	3	4	EX4	G4	?	Y	-	-	UNDETERMINED	-	-	-	-
2015-07-02	3	4	CONT4	H4	PREZOEA	-	Y	N	Y	N	Y	IMPAIRED	N			2015-07-02	3	4	EX4	H4	?	Y	-	-	UNDETERMINED	-	-	-	-
2015-07-02	3	4	CONT4	A5	?	Y	-	-	UNDETERMINED	-	-	-	-			2015-07-02	3	4	EX4	A5	ZOEA	-	Y	Y	Y	Y	Y	Y	Y
2015-07-02	3	4	CONT4	B5	ZOEA	-	Y	Y	Y	Y	Y	Y	Y			2015-07-02	3	4	EX4	B5	?	Y	-	-	UNDETERMINED	-	-	-	-
2015-07-02	3	4	CONT4	C5	9	Y	-	-	Y	-	-	-	-			2015-07-02	3	4	EX4	C5	ZOEA	-	Y	Y	Y	Y	Y	Y	Y
2015-07-02	3	4	CONT4	D5	?	Y	-	-	Y	-	-	-	-			2015-07-02	3	4	EX4	D5	ZOEA	-	Y	Y	Y	Y	Y	Y	Y
2015-07-02	3	4	CONT4	E5	?	Y	-	-	Y	-	-	-	-			2015-07-02	3	4	EX4	E5	?	Y	-	-	UNDETERMINED	-	-	-	-
2015-07-02	3	4	CONT4	F5	ZOEA	-	Y	Y	Y	Y	Y	Y	Y			2015-07-02	3	4	EX4	F5	6	Y	-	-	BROKEN UP	-	-	-	-
2015-07-02	3	4	CONT4	G5	PREZOEA	-	Y	N	Y	N	Y	IMPAIRED	N			2015-07-02	3	4	EX4	G5	?	Y	-	-	UNDETERMINED	-	-	-	-
2015-07-02	3	4	CONT4	H5	9	-	Y	-	Y	-	-	-	-			2015-07-02	3	4	EX4	H5	6	Y	-	-	BROKEN UP	-	-	-	-
2015-07-02	3	4	CONT4	A6	?	Y	-	-	Y	-	-	-	-			2015-07-02	3	4	EX4	A6	?	Y	-	-	UNDETERMINED	-	-	-	-
2015-07-02	3	4	CONT4	B6	9	Y	-	-	BROKEN UP	-	-	-	-			2015-07-02	3	4	EX4	B6	PREZOEA	-	Y	N	Y NOT EXTRUDED	N	Y	IMPAIRED	N
2015-07-02	3	4	CONT4	C6	?	Y	-	-	Y	-	-	-	-			2015-07-02	3	4	EX4	C6	?	Y	-	-	UNDETERMINED	-	-	-	-
2015-07-02	3	4	CONT4	D6	MISSING	-	-	-	-	-	-	-	-			2015-07-02	3	4	EX4	D6	?	Y	-	-	UNDETERMINED	-	-	-	-
2015-07-02	3	4	CONT4	E6	ZOEA	-	Y	Y	Y	Y	Y	Y	Y			2015-07-02	3	4	EX4	E6	9	-	Y	-	Y	-	-	-	-
2015-07-02	3	4	CONT4	F6	?	Y	-	-	Y	-	-	-	-			2015-07-02	3	4	EX4	F6	?	Y	-	-	UNDETERMINED	-	-	-	-
2015-07-02	3	4	CONT4	G6	?	Y	-	-	Y	-	-	-	-			2015-07-02	3	4	EX4	G6	?	Y	-	-	UNDETERMINED	-	-	-	-
2015-07-02	3	4	CONT4	H6	?	Y	-	-	Y	-	-	-	-			2015-07-02	3	4	EX4	H6	?	Y	-	-	UNDETERMINED	-	-	-	-

## Sheet: Replicate 4
Date	Replicate #	Day	Plate ID	Well ID	Stage	Cloudy/Dark	Heart beat	Dorsal Spine	Eyes (Full & Bilaterally symmetrical)	Rostrum	Telson	Swimming ablility	Lateral Spines			Date	Replicate #	Day	Plate ID	Well ID	Stage	Cloudy/Dark	Heart beat	Dorsal Spine	Eyes (Full & Bilaterally symmetrical)	Rostrum	Telson	Swimming ablility	Lateral Spines
2015-07-09	4	1	Cont1	A1	5	-	-	-	NOT PRESENT	-	-	-	-			2015-07-09	4	1	EX1	A1	5	-	-	-	NOT PRESENT	-	-	-	-
2015-07-09	4	1	Cont1	B1	5	-	-	-	NOT PRESENT	-	-	-	-			2015-07-09	4	1	EX1	B1	5	-	-	-	NOT PRESENT	-	-	-	-
2015-07-09	4	1	Cont1	C1	5	-	-	-	NOT PRESENT	-	-	-	-			2015-07-09	4	1	EX1	C1	5	-	-	-	NOT PRESENT	-	-	-	-
2015-07-09	4	1	Cont1	D1	5	-	-	-	NOT PRESENT	-	-	-	-			2015-07-09	4	1	EX1	D1	5	-	-	-	NOT PRESENT	-	-	-	-
2015-07-09	4	1	Cont1	E1	5	-	-	-	NOT PRESENT	-	-	-	-			2015-07-09	4	1	EX1	E1	5	-	-	-	NOT PRESENT	-	-	-	-
2015-07-09	4	1	Cont1	F1	5	-	-	-	NOT PRESENT	-	-	-	-			2015-07-09	4	1	EX1	F1	5	-	-	-	NOT PRESENT	-	-	-	-
2015-07-09	4	1	Cont1	G1	5	-	-	-	NOT PRESENT	-	-	-	-			2015-07-09	4	1	EX1	G1	5	-	-	-	NOT PRESENT	-	-	-	-
2015-07-09	4	1	Cont1	H1	5	-	-	-	NOT PRESENT	-	-	-	-			2015-07-09	4	1	EX1	H1	5	-	-	-	NOT PRESENT	-	-	-	-
2015-07-09	4	1	Cont1	A2	5	-	-	-	NOT PRESENT	-	-	-	-			2015-07-09	4	1	EX1	A2	5	-	-	-	NOT PRESENT	-	-	-	-
2015-07-09	4	1	Cont1	B2	5	-	-	-	NOT PRESENT	-	-	-	-			2015-07-09	4	1	EX1	B2	5	-	-	-	NOT PRESENT	-	-	-	-
2015-07-09	4	1	Cont1	C2	5	Y	-	-	NOT PRESENT	-	-	-	-			2015-07-09	4	1	EX1	C2	3	Y	-	-	NOT PRESENT	-	-	-	-
2015-07-09	4	1	Cont1	D2	5	Y	-	-	NOT PRESENT	-	-	-	-			2015-07-09	4	1	EX1	D2	4	Y	-	-	NOT PRESENT	-	-	-	-
2015-07-09	4	1	Cont1	E2	5	-	-	-	NOT PRESENT	-	-	-	-			2015-07-09	4	1	EX1	E2	5	-	-	-	NOT PRESENT	-	-	-	-
2015-07-09	4	1	Cont1	F2	5	-	-	-	NOT PRESENT	-	-	-	-			2015-07-09	4	1	EX1	F2	5	-	-	-	NOT PRESENT	-	-	-	-
2015-07-09	4	1	Cont1	G2	5	-	-	-	NOT PRESENT	-	-	-	-			2015-07-09	4	1	EX1	G2	5	-	-	-	NOT PRESENT	-	-	-	-
2015-07-09	4	1	Cont1	H2	5	-	-	-	NOT PRESENT	-	-	-	-			2015-07-09	4	1	EX1	H2	5	-	-	-	NOT PRESENT	-	-	-	-
2015-07-09	4	1	Cont1	A3	5	-	-	-	NOT PRESENT	-	-	-	-			2015-07-09	4	1	EX1	A3	4	Y	-	-	NOT PRESENT	-	-	-	-
2015-07-09	4	1	Cont1	B3	5	-	-	-	NOT PRESENT	-	-	-	-			2015-07-09	4	1	EX1	B3	4	-	-	-	NOT PRESENT	-	-	-	-
2015-07-09	4	1	Cont1	C3	5	-	-	-	NOT PRESENT	-	-	-	-			2015-07-09	4	1	EX1	C3	5	-	-	-	NOT PRESENT	-	-	-	-
2015-07-09	4	1	Cont1	D3	5	-	-	-	NOT PRESENT	-	-	-	-			2015-07-09	4	1	EX1	D3	5	-	-	-	NOT PRESENT	-	-	-	-
2015-07-09	4	1	Cont1	E3	5	-	-	-	NOT PRESENT	-	-	-	-			2015-07-09	4	1	EX1	E3	5	-	-	-	NOT PRESENT	-	-	-	-
2015-07-09	4	1	Cont1	F3	5	-	-	-	NOT PRESENT	-	-	-	-			2015-07-09	4	1	EX1	F3	4	Y	-	-	NOT PRESENT	-	-	-	-
2015-07-09	4	1	Cont1	G3	5	Y	-	-	NOT PRESENT	-	-	-	-			2015-07-09	4	1	EX1	G3	5	-	-	-	NOT PRESENT	-	-	-	-
2015-07-09	4	1	Cont1	H3	5	-	-	-	NOT PRESENT	-	-	-	-			2015-07-09	4	1	EX1	H3	5	-	-	-	NOT PRESENT	-	-	-	-
2015-07-09	4	1	Cont1	A4	5	Y	-	-	NOT PRESENT	-	-	-	-			2015-07-09	4	1	EX1	A4	5	-	-	-	NOT PRESENT	-	-	-	-
2015-07-09	4	1	Cont1	B4	5	-	-	-	NOT PRESENT	-	-	-	-			2015-07-09	4	1	EX1	B4	3	Y	-	-	NOT PRESENT	-	-	-	-
2015-07-09	4	1	Cont1	C4	5	Y	-	-	NOT PRESENT	-	-	-	-			2015-07-09	4	1	EX1	C4	5	-	-	-	NOT PRESENT	-	-	-	-
2015-07-09	4	1	Cont1	D4	5	-	-	-	NOT PRESENT	-	-	-	-			2015-07-09	4	1	EX1	D4	4	-	-	-	NOT PRESENT	-	-	-	-
2015-07-09	4	1	Cont1	E4	5	-	-	-	NOT PRESENT	-	-	-	-			2015-07-09	4	1	EX1	E4	5	-	-	-	NOT PRESENT	-	-	-	-
2015-07-09	4	1	Cont1	F4	5	Y	-	-	NOT PRESENT	-	-	-	-			2015-07-09	4	1	EX1	F4	5	-	-	-	NOT PRESENT	-	-	-	-
2015-07-09	4	1	Cont1	G4	5	-	-	-	NOT PRESENT	-	-	-	-			2015-07-09	4	1	EX1	G4	4	Y	-	-	NOT PRESENT	-	-	-	-
2015-07-09	4	1	Cont1	H4	5	-	-	-	NOT PRESENT	-	-	-	-			2015-07-09	4	1	EX1	H4	5	-	-	-	NOT PRESENT	-	-	-	-
2015-07-09	4	1	Cont1	A5	5	-	-	-	NOT PRESENT	-	-	-	-			2015-07-09	4	1	EX1	A5	4	Y	-	-	NOT PRESENT	-	-	-	-
2015-07-09	4	1	Cont1	B5	5	-	-	-	NOT PRESENT	-	-	-	-			2015-07-09	4	1	EX1	B5	5	-	-	-	NOT PRESENT	-	-	-	-
2015-07-09	4	1	Cont1	C5	5	-	-	-	NOT PRESENT	-	-	-	-			2015-07-09	4	1	EX1	C5	5	-	-	-	NOT PRESENT	-	-	-	-
2015-07-09	4	1	Cont1	D5	5	-	-	-	NOT PRESENT	-	-	-	-			2015-07-09	4	1	EX1	D5	5	-	-	-	NOT PRESENT	-	-	-	-
2015-07-09	4	1	Cont1	E5	5	Y	-	-	NOT PRESENT	-	-	-	-			2015-07-09	4	1	EX1	E5	5	-	-	-	NOT PRESENT	-	-	-	-
2015-07-09	4	1	Cont1	F5	5	-	-	-	NOT PRESENT	-	-	-	-			2015-07-09	4	1	EX1	F5	5	-	-	-	NOT PRESENT	-	-	-	-
2015-07-09	4	1	Cont1	G5	5	-	-	-	NOT PRESENT	-	-	-	-			2015-07-09	4	1	EX1	G5	5	-	-	-	NOT PRESENT	-	-	-	-
2015-07-09	4	1	Cont1	H5	5	-	-	-	NOT PRESENT	-	-	-	-			2015-07-09	4	1	EX1	H5	5	-	-	-	NOT PRESENT	-	-	-	-
2015-07-09	4	1	Cont1	A6	5	Y	-	-	NOT PRESENT	-	-	-	-			2015-07-09	4	1	EX1	A6	5	-	-	-	NOT PRESENT	-	-	-	-
2015-07-09	4	1	Cont1	B6	5	-	-	-	NOT PRESENT	-	-	-	-			2015-07-09	4	1	EX1	B6	5	-	-	-	NOT PRESENT	-	-	-	-
2015-07-09	4	1	Cont1	C6	5	-	-	-	NOT PRESENT	-	-	-	-			2015-07-09	4	1	EX1	C6	4	-	-	-	NOT PRESENT	-	-	-	-
2015-07-09	4	1	Cont1	D6	5	-	-	-	NOT PRESENT	-	-	-	-			2015-07-09	4	1	EX1	D6	5	-	-	-	NOT PRESENT	-	-	-	-
2015-07-09	4	1	Cont1	E6	5	Y	-	-	NOT PRESENT	-	-	-	-			2015-07-09	4	1	EX1	E6	5	-	-	-	NOT PRESENT	-	-	-	-
2015-07-09	4	1	Cont1	F6	5	Y	-	-	NOT PRESENT	-	-	-	-			2015-07-09	4	1	EX1	F6	5	-	-	-	NOT PRESENT	-	-	-	-
2015-07-09	4	1	Cont1	G6	5	-	-	-	NOT PRESENT	-	-	-	-			2015-07-09	4	1	EX1	G6	5	-	-	-	NOT PRESENT	-	-	-	-
2015-07-10	4	1	Cont1	H6	5	-	-	-	NOT PRESENT	-	-	-	-			2015-07-09	4	1	EX1	H6	3	-	-	-	NOT PRESENT	-	-	-	-
2015-07-10	4	2	CONT2	A1	6	-	-	-	Y	-	-	-	-			2015-07-10	4	2	EX2	A1	6	-	-	-	Y	-	-	-	-
2015-07-10	4	2	CONT2	B1	6	-	-	-	Y	-	-	-	-			2015-07-10	4	2	EX2	B1	6	-	-	-	Y	-	-	-	-
2015-07-10	4	2	CONT2	C1	6	-	-	-	Y	-	-	-	-			2015-07-10	4	2	EX2	C1	6	-	-	-	Y	-	-	-	-
2015-07-10	4	2	CONT2	D1	6	-	-	-	Y	-	-	-	-			2015-07-10	4	2	EX2	D1	6	-	-	-	Y	-	-	-	-
2015-07-10	4	2	CONT2	E1	7	-	-	-	Y	-	-	-	-			2015-07-10	4	2	EX2	E1	7	-	-	-	Y	-	-	-	-
2015-07-10	4	2	CONT2	F1	?	Y	-	-	NOT PRESENT	-	-	-	-			2015-07-10	4	2	EX2	F1	6	-	-	-	Y	-	-	-	-
2015-07-10	4	2	CONT2	G1	MISSING	-	-	-	-	-	-	-	-			2015-07-10	4	2	EX2	G1	4	Y	-	-	NOT PRESENT	-	-	-	-
2015-07-10	4	2	CONT2	H1	6	-	-	-	Y	-	-	-	-			2015-07-10	4	2	EX2	H1	?	Y	-	-	UNDETERMINED	-	-	-	-
2015-07-10	4	2	CONT2	A2	6	-	-	-	Y	-	-	-	-			2015-07-10	4	2	EX2	A2	6	-	-	-	Y	-	-	-	-
2015-07-10	4	2	CONT2	B2	6	-	-	-	Y	-	-	-	-			2015-07-10	4	2	EX2	B2	6	-	-	-	Y	-	-	-	-
2015-07-10	4	2	CONT2	C2	6	-	-	-	Y	-	-	-	-			2015-07-10	4	2	EX2	C2	6	Y	-	-	BROKEN UP	-	-	-	-
2015-07-10	4	2	CONT2	D2	6	-	-	-	Y	-	-	-	-			2015-07-10	4	2	EX2	D2	6	-	-	-	Y	-	-	-	-
2015-07-10	4	2	CONT2	E2	6	-	-	-	Y	-	-	-	-			2015-07-10	4	2	EX2	E2	?	Y	-	-	UNDETERMINED	-	-	-	-
2015-07-10	4	2	CONT2	F2	6	-	-	-	Y	-	-	-	-			2015-07-10	4	2	EX2	F2	6	-	-	-	Y	-	-	-	-
2015-07-10	4	2	CONT2	G2	6	-	-	-	Y	-	-	-	-			2015-07-10	4	2	EX2	G2	?	Y	-	-	UNDETERMINED	-	-	-	-
2015-07-10	4	2	CONT2	H2	6	-	-	-	Y	-	-	-	-			2015-07-10	4	2	EX2	H2	6	-	-	-	Y	-	-	-	-
2015-07-10	4	2	CONT2	A3	6	-	-	-	Y	-	-	-	-			2015-07-10	4	2	EX2	A3	6	-	-	-	Y	-	-	-	-
2015-07-10	4	2	CONT2	B3	6	-	-	-	Y	-	-	-	-			2015-07-10	4	2	EX2	B3	6	-	-	-	Y	-	-	-	-
2015-07-10	4	2	CONT2	C3	6	-	-	-	Y	-	-	-	-			2015-07-10	4	2	EX2	C3	6	-	-	-	Y	-	-	-	-
2015-07-10	4	2	CONT2	D3	?	Y	-	-	UNDETERMINED	-	-	-	-			2015-07-10	4	2	EX2	D3	6	-	-	-	Y	-	-	-	-
2015-07-10	4	2	CONT2	E3	6	-	-	-	Y	-	-	-	-			2015-07-10	4	2	EX2	E3	6	-	-	-	Y	-	-	-	-
2015-07-10	4	2	CONT2	F3	6	-	-	-	Y	-	-	-	-			2015-07-10	4	2	EX2	F3	6	-	-	-	Y	-	-	-	-
2015-07-10	4	2	CONT2	G3	6	-	-	-	Y	-	-	-	-			2015-07-10	4	2	EX2	G3	4	Y	-	-	NOT PRESENT	-	-	-	-
2015-07-10	4	2	CONT2	H3	6	-	-	-	Y	-	-	-	-			2015-07-10	4	2	EX2	H3	6	-	-	-	Y	-	-	-	-
2015-07-10	4	2	CONT2	A4	6	-	-	-	Y	-	-	-	-			2015-07-10	4	2	EX2	A4	?	Y	-	-	UNDETERMINED	-	-	-	-
2015-07-10	4	2	CONT2	B4	6	-	-	-	Y	-	-	-	-			2015-07-10	4	2	EX2	B4	6	-	-	-	Y	-	-	-	-
2015-07-10	4	2	CONT2	C4	6	-	-	-	Y	-	-	-	-			2015-07-10	4	2	EX2	C4	7	-	-	-	Y	-	-	-	-
2015-07-10	4	2	CONT2	D4	6	-	-	-	Y	-	-	-	-			2015-07-10	4	2	EX2	D4	6	-	-	-	Y	-	-	-	-
2015-07-10	4	2	CONT2	E4	6	-	-	-	Y	-	-	-	-			2015-07-10	4	2	EX2	E4	?	Y	-	-	UNDETERMINED	-	-	-	-
2015-07-10	4	2	CONT2	F4	6	-	-	-	Y	-	-	-	-			2015-07-10	4	2	EX2	F4	6	-	-	-	Y	-	-	-	-
2015-07-10	4	2	CONT2	G4	6	-	-	-	Y	-	-	-	-			2015-07-10	4	2	EX2	G4	6	-	-	-	Y	-	-	-	-
2015-07-10	4	2	CONT2	H4	6	-	-	-	Y	-	-	-	-			2015-07-10	4	2	EX2	H4	6	-	-	-	Y	-	-	-	-
2015-07-10	4	2	CONT2	A5	6	-	-	-	Y	-	-	-	-			2015-07-10	4	2	EX2	A5	6	-	-	-	Y	-	-	-	-
2015-07-10	4	2	CONT2	B5	6	-	-	-	Y	-	-	-	-			2015-07-10	4	2	EX2	B5	6	-	-	-	Y	-	-	-	-
2015-07-10	4	2	CONT2	C5	?	Y	-	-	UNDETERMINED	-	-	-	-			2015-07-10	4	2	EX2	C5	6	-	-	-	Y	-	-	-	-
2015-07-10	4	2	CONT2	D5	6	-	-	-	Y	-	-	-	-			2015-07-10	4	2	EX2	D5	?	Y	-	-	UNDETERMINED	-	-	-	-
2015-07-10	4	2	CONT2	E5	6	-	-	-	Y	-	-	-	-			2015-07-10	4	2	EX2	E5	6	-	-	-	Y	-	-	-	-
2015-07-10	4	2	CONT2	F5	6	-	-	-	Y	-	-	-	-			2015-07-10	4	2	EX2	F5	6	-	-	-	Y	-	-	-	-
2015-07-10	4	2	CONT2	G5	?	Y	-	-	UNDETERMINED	-	-	-	-			2015-07-10	4	2	EX2	G5	6	-	-	-	Y	-	-	-	-
2015-07-10	4	2	CONT2	H5	6	-	-	-	Y	-	-	-	-			2015-07-10	4	2	EX2	H5	6	-	-	-	Y	-	-	-	-
2015-07-10	4	2	CONT2	A6	6	-	-	-	Y	-	-	-	-			2015-07-10	4	2	EX2	A6	6	-	-	-	Y	-	-	-	-
2015-07-10	4	2	CONT2	B6	6	-	-	-	Y	-	-	-	-			2015-07-10	4	2	EX2	B6	?	-	-	-	UNDETERMINED	-	-	-	-
2015-07-10	4	2	CONT2	C6	?	Y	-	-	UNDETERMINED	-	-	-	-			2015-07-10	4	2	EX2	C6	6	-	-	-	Y	-	-	-	-
2015-07-10	4	2	CONT2	D6	6	Y	-	-	Y	-	-	-	-			2015-07-10	4	2	EX2	D6	6	-	-	-	Y	-	-	-	-
2015-07-10	4	2	CONT2	E6	?	Y	-	-	UNDETERMINED	-	-	-	-			2015-07-10	4	2	EX2	E6	6	-	-	-	Y	-	-	-	-
2015-07-10	4	2	CONT2	F6	6	-	-	-	Y	-	-	-	-			2015-07-10	4	2	EX2	F6	?	-	-	-	UNDETERMINED	-	-	-	-
2015-07-10	4	2	CONT2	G6	6	-	-	-	Y	-	-	-	-			2015-07-10	4	2	EX2	G6	6	-	-	-	Y	-	-	-	-
2015-07-11	4	2	CONT2	H6	?	Y	-	-	UNDETERMINED	-	-	-	-			2015-07-10	4	2	EX2	H6	6	-	-	-	Y	-	-	-	-
2015-07-11	4	3	CONT3	A1	5	-	-	-	Y	-	-	-	-			2015-07-11	4	3	EX3	A1	8	-	-	-	Y	-	-	-	-
2015-07-11	4	3	CONT3	B1	8	-	-	-	Y	-	-	-	-			2015-07-11	4	3	EX3	B1	8	-	-	-	Y	-	-	-	-
2015-07-11	4	3	CONT3	C1	8	-	-	-	Y	-	-	-	-			2015-07-11	4	3	EX3	C1	?	Y	-	-	UNDETERMINED	-	-	-	-
2015-07-11	4	3	CONT3	D1	8	-	-	-	Y	-	-	-	-			2015-07-11	4	3	EX3	D1	MISSING	-	-	-	Y	-	-	-	-
2015-07-11	4	3	CONT3	E1	9	-	-	-	Y	-	-	-	-			2015-07-11	4	3	EX3	E1	8	-	-	-	Y	-	-	-	-
2015-07-11	4	3	CONT3	F1	8	-	-	-	Y	-	-	-	-			2015-07-11	4	3	EX3	F1	8	-	-	-	Y	-	-	-	-
2015-07-11	4	3	CONT3	G1	8	-	-	-	Y	-	-	-	-			2015-07-11	4	3	EX3	G1	8	-	-	-	Y	-	-	-	-
2015-07-11	4	3	CONT3	H1	8	-	-	-	Y	-	-	-	-			2015-07-11	4	3	EX3	H1	8	-	-	-	Y	-	-	-	-
2015-07-11	4	3	CONT3	A2	-	-	-	-	-	-	-	-	-			2015-07-11	4	3	EX3	A2	8	-	-	-	Y	-	-	-	-
2015-07-11	4	3	CONT3	B2	8	-	-	-	Y	-	-	-	-			2015-07-11	4	3	EX3	B2	8	-	-	-	Y	-	-	-	-
2015-07-11	4	3	CONT3	C2	8	-	-	-	Y	-	-	-	-			2015-07-11	4	3	EX3	C2	8	-	-	-	Y	-	-	-	-
2015-07-11	4	3	CONT3	D2	8	-	-	-	Y	-	-	-	-			2015-07-11	4	3	EX3	D2	8	-	-	-	Y	-	-	-	-
2015-07-11	4	3	CONT3	E2	8	-	-	-	Y	-	-	-	-			2015-07-11	4	3	EX3	E2	8	-	-	-	Y	-	-	-	-
2015-07-11	4	3	CONT3	F2	8	-	-	-	Y	-	-	-	-			2015-07-11	4	3	EX3	F2	8	-	-	-	Y	-	-	-	-
2015-07-11	4	3	CONT3	G2	8	-	-	-	Y	-	-	-	-			2015-07-11	4	3	EX3	G2	8	-	-	-	Y	-	-	-	-
2015-07-11	4	3	CONT3	H2	8	-	-	-	Y	-	-	-	-			2015-07-11	4	3	EX3	H2	8	-	-	-	Y	-	-	-	-
2015-07-11	4	3	CONT3	A3	8	-	-	-	Y	-	-	-	-			2015-07-11	4	3	EX3	A3	8	-	-	-	Y	-	-	-	-
2015-07-11	4	3	CONT3	B3	8	-	-	-	Y	-	-	-	-			2015-07-11	4	3	EX3	B3	8	-	-	-	Y	-	-	-	-
2015-07-11	4	3	CONT3	C3	8	-	-	-	Y	-	-	-	-			2015-07-11	4	3	EX3	C3	8	-	-	-	Y	-	-	-	-
2015-07-11	4	3	CONT3	D3	8	-	-	-	Y	-	-	-	-			2015-07-11	4	3	EX3	D3	8	-	-	-	Y	-	-	-	-
2015-07-11	4	3	CONT3	E3	8	-	-	-	Y	-	-	-	-			2015-07-11	4	3	EX3	E3	8	-	-	-	Y	-	-	-	-
2015-07-11	4	3	CONT3	F3	?	Y	-	-	UNDETERMINED	-	-	-	-			2015-07-11	4	3	EX3	F3	8	-	-	-	Y	-	-	-	-
2015-07-11	4	3	CONT3	G3	8	-	-	-	Y	-	-	-	-			2015-07-11	4	3	EX3	G3	8	-	-	-	Y	-	-	-	-
2015-07-11	4	3	CONT3	H3	8	-	-	-	Y	-	-	-	-			2015-07-11	4	3	EX3	H3	8	-	-	-	Y	-	-	-	-
2015-07-11	4	3	CONT3	A4	8	-	-	-	Y	-	-	-	-			2015-07-11	4	3	EX3	A4	?	Y	-	-	UNDETERMINED	-	-	-	-
2015-07-11	4	3	CONT3	B4	8	-	-	-	Y	-	-	-	-			2015-07-11	4	3	EX3	B4	8	-	-	-	Y	-	-	-	-
2015-07-11	4	3	CONT3	C4	?	Y	-	-	UNDETERMINED	-	-	-	-			2015-07-11	4	3	EX3	C4	?	Y	-	-	UNDETERMINED	-	-	-	-
2015-07-11	4	3	CONT3	D4	8	-	-	-	Y	-	-	-	-			2015-07-11	4	3	EX3	D4	8	-	-	-	Y	-	-	-	-
2015-07-11	4	3	CONT3	E4	?	Y	-	-	UNDETERMINED	-	-	-	-			2015-07-11	4	3	EX3	E4	8	-	-	-	Y	-	-	-	-
2015-07-11	4	3	CONT3	F4	?	Y	-	-	UNDETERMINED	-	-	-	-			2015-07-11	4	3	EX3	F4	8	-	-	-	Y	-	-	-	-
2015-07-11	4	3	CONT3	G4	8	-	-	-	Y	-	-	-	-			2015-07-11	4	3	EX3	G4	8	-	-	-	Y	-	-	-	-
2015-07-11	4	3	CONT3	H4	8	-	-	-	Y	-	-	-	-			2015-07-11	4	3	EX3	H4	8	-	-	-	Y	-	-	-	-
2015-07-11	4	3	CONT3	A5	8	-	-	-	Y	-	-	-	-			2015-07-11	4	3	EX3	A5	8	-	-	-	Y	-	-	-	-
2015-07-11	4	3	CONT3	B5	8	-	-	-	Y	-	-	-	-			2015-07-11	4	3	EX3	B5	8	-	-	-	Y	-	-	-	-
2015-07-11	4	3	CONT3	C5	8	-	-	-	Y	-	-	-	-			2015-07-11	4	3	EX3	C5	8	-	-	-	Y	-	-	-	-
2015-07-11	4	3	CONT3	D5	8	-	-	-	Y	-	-	-	-			2015-07-11	4	3	EX3	D5	8	-	-	-	Y	-	-	-	-
2015-07-11	4	3	CONT3	E5	8	-	-	-	Y	-	-	-	-			2015-07-11	4	3	EX3	E5	8	-	-	-	Y	-	-	-	-
2015-07-11	4	3	CONT3	F5	?	Y	-	-	UNDETERMINED	-	-	-	-			2015-07-11	4	3	EX3	F5	8	-	-	-	Y	-	-	-	-
2015-07-11	4	3	CONT3	G5	8	-	-	-	Y	-	-	-	-			2015-07-11	4	3	EX3	G5	8	-	-	-	Y	-	-	-	-
2015-07-11	4	3	CONT3	H5	8	-	-	-	Y	-	-	-	-			2015-07-11	4	3	EX3	H5	8	-	-	-	Y	-	-	-	-
2015-07-11	4	3	CONT3	A6	?	Y	-	-	UNDETERMINED	-	-	-	-			2015-07-11	4	3	EX3	A6	8	-	-	-	Y	-	-	-	-
2015-07-11	4	3	CONT3	B6	?	Y	-	-	UNDETERMINED	-	-	-	-			2015-07-11	4	3	EX3	B6	8	-	-	-	Y	-	-	-	-
2015-07-11	4	3	CONT3	C6	?	Y	-	-	UNDETERMINED	-	-	-	-			2015-07-11	4	3	EX3	C6	5	Y	-	-	NOT PRESENT	-	-	-	-
2015-07-11	4	3	CONT3	D6	8	-	-	-	Y	-	-	-	-			2015-07-11	4	3	EX3	D6	8	-	-	-	Y	-	-	-	-
2015-07-11	4	3	CONT3	E6	8	-	-	-	Y	-	-	-	-			2015-07-11	4	3	EX3	E6	8	-	-	-	Y	-	-	-	-
2015-07-11	4	3	CONT3	F6	8	-	-	-	Y	-	-	-	-			2015-07-11	4	3	EX3	F6	8	-	-	-	Y	-	-	-	-
2015-07-11	4	3	CONT3	G6	8	-	-	-	Y	-	-	-	-			2015-07-11	4	3	EX3	G6	?	Y	-	-	UNDETERMINED	-	-	-	-
2015-07-12	4	3	CONT3	H6	8	-	-	-	Y	-	-	-	-			2015-07-11	4	3	EX3	H6	8	-	-	-	Y	-	-	-	-
2015-07-12	4	4	CONT4	A1	9	-	Y	-	Y	-	-	-	-			2015-07-12	4	4	EX4	A1	9	-	Y	-	Y	-	-	-	-
2015-07-12	4	4	CONT4	B1	9	-	Y	-	Y	-	-	-	-			2015-07-12	4	4	EX4	B1	9	-	Y	-	Y	-	-	-	-
2015-07-12	4	4	CONT4	C1	9	-	Y	-	Y	-	-	-	-			2015-07-12	4	4	EX4	C1	9	-	Y	-	Y	-	-	-	-
2015-07-12	4	4	CONT4	D1	9	-	Y	-	Y	-	-	-	-			2015-07-12	4	4	EX4	D1	9	-	Y	-	Y	-	-	-	-
2015-07-12	4	4	CONT4	E1	9	-	Y	-	Y	-	-	-	-			2015-07-12	4	4	EX4	E1	9	-	Y	-	Y	-	-	-	-
2015-07-12	4	4	CONT4	F1	9	-	Y	-	Y	-	-	-	-			2015-07-12	4	4	EX4	F1	9	-	Y	-	Y	-	-	-	-
2015-07-12	4	4	CONT4	G1	?	Y	-	-	UNDETERMINED	-	-	-	-			2015-07-12	4	4	EX4	G1	9	-	Y	-	Y	-	-	-	-
2015-07-12	4	4	CONT4	H1	9	-	Y	-	Y	-	-	-	-			2015-07-12	4	4	EX4	H1	9	-	Y	-	Y	-	-	-	-
2015-07-12	4	4	CONT4	A2	9	-	Y	-	Y	-	-	-	-			2015-07-12	4	4	EX4	A2	9	-	Y	-	Y	-	-	-	-
2015-07-12	4	4	CONT4	B2	9	-	Y	-	Y	-	-	-	-			2015-07-12	4	4	EX4	B2	9	-	Y	-	Y	-	-	-	-
2015-07-12	4	4	CONT4	C2	9	-	Y	-	Y	-	-	-	-			2015-07-12	4	4	EX4	C2	9	-	Y	-	Y	-	-	-	-
2015-07-12	4	4	CONT4	D2	9	-	Y	-	Y	-	-	-	-			2015-07-12	4	4	EX4	D2	9	-	Y	-	Y	-	-	-	-
2015-07-12	4	4	CONT4	E2	9	-	Y	-	Y	-	-	-	-			2015-07-12	4	4	EX4	E2	?	Y	-	-	UNDETERMINED	-	-	-	-
2015-07-12	4	4	CONT4	F2	9	-	Y	-	Y	-	-	-	-			2015-07-12	4	4	EX4	F2	9	-	Y	-	Y	-	-	-	-
2015-07-12	4	4	CONT4	G2	?	Y	-	-	UNDETERMINED	-	-	-	-			2015-07-12	4	4	EX4	G2	9	-	Y	-	Y	-	-	-	-
2015-07-12	4	4	CONT4	H2	9	-	Y	-	Y	-	-	-	-			2015-07-12	4	4	EX4	H2	9	-	Y	-	Y	-	-	-	-
2015-07-12	4	4	CONT4	A3	9	-	Y	-	Y	-	-	-	-			2015-07-12	4	4	EX4	A3	9	-	-	-	Y	-	-	-	-
2015-07-12	4	4	CONT4	B3	9	-	Y	-	Y	-	-	-	-			2015-07-12	4	4	EX4	B3	9	-	-	-	Y	-	-	-	-
2015-07-12	4	4	CONT4	C3	9	-	Y	-	Y	-	-	-	-			2015-07-12	4	4	EX4	C3	?	Y	-	-	UNDETERMINED	-	-	-	-
2015-07-12	4	4	CONT4	D3	9	-	Y	-	Y	-	-	-	-			2015-07-12	4	4	EX4	D3	?	Y	-	-	UNDETERMINED	-	-	-	-
2015-07-12	4	4	CONT4	E3	9	-	Y	-	Y	-	-	-	-			2015-07-12	4	4	EX4	E3	9	-	Y	-	Y	-	-	-	-
2015-07-12	4	4	CONT4	F3	?	Y	-	-	UNDETERMINED	-	-	-	-			2015-07-12	4	4	EX4	F3	9	-	Y	-	Y	-	-	-	-
2015-07-12	4	4	CONT4	G3	9	-	Y	-	Y	-	-	-	-			2015-07-12	4	4	EX4	G3	9	-	Y	-	Y	-	-	-	-
2015-07-12	4	4	CONT4	H3	9	-	Y	-	Y	-	-	-	-			2015-07-12	4	4	EX4	H3	9	-	Y	-	Y	-	-	-	-
2015-07-12	4	4	CONT4	A4	?	Y	-	-	UNDETERMINED	-	-	-	-			2015-07-12	4	4	EX4	A4	9	-	Y	-	Y	-	-	-	-
2015-07-12	4	4	CONT4	B4	?	Y	-	-	UNDETERMINED	-	-	-	-			2015-07-12	4	4	EX4	B4	9	-	Y	-	Y	-	-	-	-
2015-07-12	4	4	CONT4	C4	9	-	Y	-	Y	-	-	-	-			2015-07-12	4	4	EX4	C4	9	-	Y	-	Y	-	-	-	-
2015-07-12	4	4	CONT4	D4	9	-	Y	-	Y	-	-	-	-			2015-07-12	4	4	EX4	D4	9	-	Y	-	Y	-	-	-	-
2015-07-12	4	4	CONT4	E4	9	-	Y	-	Y	-	-	-	-			2015-07-12	4	4	EX4	E4	9	-	Y	-	Y	-	-	-	-
2015-07-12	4	4	CONT4	F4	?	Y	-	-	UNDETERMINED	-	-	-	-			2015-07-12	4	4	EX4	F4	9	-	Y	-	Y	-	-	-	-
2015-07-12	4	4	CONT4	G4	?	Y	-	-	UNDETERMINED	-	-	-	-			2015-07-12	4	4	EX4	G4	9	-	Y	-	Y	-	-	-	-
2015-07-12	4	4	CONT4	H4	9	-	Y	-	Y	-	-	-	-			2015-07-12	4	4	EX4	H4	9	-	Y	-	Y	-	-	-	-
2015-07-12	4	4	CONT4	A5	9	-	Y	-	Y	-	-	-	-			2015-07-12	4	4	EX4	A5	9	-	Y	-	Y	-	-	-	-
2015-07-12	4	4	CONT4	B5	9	-	Y	-	Y	-	-	-	-			2015-07-12	4	4	EX4	B5	?	Y	-	-	UNDETERMINED	-	-	-	-
2015-07-12	4	4	CONT4	C5	9	-	Y	-	Y	-	-	-	-			2015-07-12	4	4	EX4	C5	7	Y	-	-	BROKEN UP	-	-	-	-
2015-07-12	4	4	CONT4	D5	MISSING	-	-	-	-	-	-	-	-			2015-07-12	4	4	EX4	D5	9	-	Y	-	Y	-	-	-	-
2015-07-12	4	4	CONT4	E5	9	-	Y	-	Y	-	-	-	-			2015-07-12	4	4	EX4	E5	9	-	Y	-	Y	-	-	-	-
2015-07-12	4	4	CONT4	F5	?	Y	-	-	-	-	-	-	-			2015-07-12	4	4	EX4	F5	9	-	Y	-	Y	-	-	-	-
2015-07-12	4	4	CONT4	G5	?	Y	-	-	-	-	-	-	-			2015-07-12	4	4	EX4	G5	9	-	Y	-	Y	-	-	-	-
2015-07-12	4	4	CONT4	H5	9	-	Y	-	Y	-	-	-	-			2015-07-12	4	4	EX4	H5	9	-	Y	-	Y	-	-	-	-
2015-07-12	4	4	CONT4	A6	9	-	Y	-	Y	-	-	-	-			2015-07-12	4	4	EX4	A6	9	-	Y	-	Y	-	-	-	-
2015-07-12	4	4	CONT4	B6	9	-	Y	-	Y	-	-	-	-			2015-07-12	4	4	EX4	B6	9	-	Y	-	Y	-	-	-	-
2015-07-12	4	4	CONT4	C6	9	-	Y	-	Y	-	-	-	-			2015-07-12	4	4	EX4	C6	9	-	Y	-	Y	-	-	-	-
2015-07-12	4	4	CONT4	D6	9	-	Y	-	Y	-	-	-	-			2015-07-12	4	4	EX4	D6	9	-	Y	-	Y	-	-	-	-
2015-07-12	4	4	CONT4	E6	9	-	Y	-	Y	-	-	-	-			2015-07-12	4	4	EX4	E6	9	-	Y	-	Y	-	-	-	-
2015-07-12	4	4	CONT4	F6	9	-	Y	-	Y	-	-	-	-			2015-07-12	4	4	EX4	F6	9	-	Y	-	Y	-	-	-	-
2015-07-12	4	4	CONT4	G6	9	-	Y	-	Y	-	-	-	-			2015-07-12	4	4	EX4	G6	9	-	Y	-	Y	-	-	-	-
2015-07-13	4	5	CONT4	H6	9	-	Y	-	Y	-	-	-	-			2015-07-12	4	5	EX4	H6	9	-	Y	-	Y	-	-	-	-
2015-07-13	4	5	CONT5	A1	ZOEA	-	Y	Y	Y	Y	Y	Y	Y			2015-07-13	4	5	EX5	A1	ZOEA	-	Y	Y	Y	Y	Y	Y	Y
2015-07-13	4	5	CONT5	B1	9	-	Y	-	Y	-	-	-	-			2015-07-13	4	5	EX5	B1	PREZOEA	-	Y	N	Y	N	Y	IMPAIRED	N
2015-07-13	4	5	CONT5	C1	ZOEA	-	Y	Y	Y	Y	Y	Y	Y			2015-07-13	4	5	EX5	C1	PREZOEA	-	Y	N	Y	N	Y	IMPAIRED	N
2015-07-13	4	5	CONT5	D1	ZOEA	-	Y	Y	Y	Y	Y	Y	Y			2015-07-13	4	5	EX5	D1	PREZOEA	-	Y	SHORT	Y	N	Y	IMPAIRED	N
2015-07-13	4	5	CONT5	E1	?	Y	-	-	UNDETERMINED	-	-	-	-			2015-07-13	4	5	EX5	E1	ZOEA	-	Y	Y	Y	Y	Y	Y	Y
2015-07-13	4	5	CONT5	F1	ZOEA	-	Y	Y	Y	Y	Y	Y	Y			2015-07-13	4	5	EX5	F1	?	Y	-	-	UNDETERMINED	-	-	-	-
2015-07-13	4	5	CONT5	G1	ZOEA	-	Y	Y	Y	Y	Y	Y	Y			2015-07-13	4	5	EX5	G1	9	-	Y	-	Y	-	-	-	-
2015-07-13	4	5	CONT5	H1	?	Y	-	-	UNDETERMINED	-	-	-	-			2015-07-13	4	5	EX5	H1	9	-	Y	-	Y	-	-	-	-
2015-07-13	4	5	CONT5	A2	9	Y	-	-	BROKEN UP	-	-	-	-			2015-07-13	4	5	EX5	A2	ZOEA	-	Y	Y	Y	Y	Y	Y	Y
2015-07-13	4	5	CONT5	B2	MISSING	-	-	-	-	-	-	-	-			2015-07-13	4	5	EX5	B2	?	Y	-	-	UNDETERMINED	-	-	-	-
2015-07-13	4	5	CONT5	C2	ZOEA	-	Y	Y	Y	Y	Y	Y	Y			2015-07-13	4	5	EX5	C2	ZOEA	-	Y	Y	Y	Y	Y	Y	Y
2015-07-13	4	5	CONT5	D2	ZOEA	-	Y	Y	Y	Y	Y	Y	Y			2015-07-13	4	5	EX5	D2	PREZOEA	-	Y	SHORT	Y	Y	Y	IMPAIRED	Y
2015-07-13	4	5	CONT5	E2	ZOEA	-	Y	Y	Y	Y	Y	Y	Y			2015-07-13	4	5	EX5	E2	ZOEA	-	Y	Y	Y	Y	Y	Y	Y
2015-07-13	4	5	CONT5	F2	ZOEA	-	Y	Y	Y	Y	Y	Y	Y			2015-07-13	4	5	EX5	F2	ZOEA	-	Y	Y	Y	Y	Y	Y	Y
2015-07-13	4	5	CONT5	G2	ZOEA	-	Y	Y	Y	Y	Y	Y	Y			2015-07-13	4	5	EX5	G2	MISSING	-	-	-	-	-	-	-	-
2015-07-13	4	5	CONT5	H2	ZOEA	-	Y	Y	Y	Y	Y	Y	Y			2015-07-13	4	5	EX5	H2	9	Y	-	-	Y	-	-	-	-
2015-07-13	4	5	CONT5	A3	?	y	-	-	UNDETERMINED	-	-	-	-			2015-07-13	4	5	EX5	A3	MISSING	-	-	-	-	-	-	-	-
2015-07-13	4	5	CONT5	B3	ZOEA	-	Y	Y	Y	Y	Y	Y	Y			2015-07-13	4	5	EX5	B3	ZOEA	-	Y	Y	Y	Y	Y	Y	Y
2015-07-13	4	5	CONT5	C3	ZOEA	-	Y	Y	Y	Y	Y	Y	Y			2015-07-13	4	5	EX5	C3	9	Y	-	-	Y	-	-	-	-
2015-07-13	4	5	CONT5	D3	ZOEA	-	Y	Y	Y	Y	Y	Y	Y			2015-07-13	4	5	EX5	D3	MISSING	-	-	-	-	-	-	-	-
2015-07-13	4	5	CONT5	E3	9	-	Y	-	Y	-	-	-	-			2015-07-13	4	5	EX5	E3	?	Y	-	-	UNDETERMINED	-	-	-	-
2015-07-13	4	5	CONT5	F3	ZOEA	-	Y	Y	Y	Y	Y	Y	Y			2015-07-13	4	5	EX5	F3	MISSING	-	-	-	-	-	-	-	-
2015-07-13	4	5	CONT5	G3	ZOEA	-	Y	Y	Y	Y	Y	Y	Y			2015-07-13	4	5	EX5	G3	MISSING	-	-	-	-	-	-	-	-
2015-07-13	4	5	CONT5	H3	ZOEA	-	Y	Y	Y	Y	Y	Y	Y			2015-07-13	4	5	EX5	H3	PREZOEA	-	Y	SHORT	Y	N	Y	IMPAIRED	N
2015-07-13	4	5	CONT5	A4	?	Y	-	-	UNDETERMINED	-	-	-	-			2015-07-13	4	5	EX5	A4	-	-	-	-	-	-	-	-	-
2015-07-13	4	5	CONT5	B4	?	Y	-	-	UNDETERMINED	-	-	-	-			2015-07-13	4	5	EX5	B4	ZOEA	-	Y	Y	Y	Y	Y	Y	Y
2015-07-13	4	5	CONT5	C4	?	Y	-	-	UNDETERMINED	-	-	-	-			2015-07-13	4	5	EX5	C4	9	-	Y	-	Y	-	-	-	-
2015-07-13	4	5	CONT5	D4	ZOEA	-	Y	Y	Y	Y	Y	Y	Y			2015-07-13	4	5	EX5	D4	ZOEA	-	Y	Y	Y	Y	Y	Y	Y
2015-07-13	4	5	CONT5	E4	ZOEA	-	Y	Y	Y	Y	Y	Y	Y			2015-07-13	4	5	EX5	E4	?	Y	-	-	UNDETERMINED	-	-	-	-
2015-07-13	4	5	CONT5	F4	PREZOEA	-	Y	N	Y	N	Y	IMPAIRED	N			2015-07-13	4	5	EX5	F4	?	Y	-	-	UNDETERMINED	-	-	-	-
2015-07-13	4	5	CONT5	G4	9	-	Y	-	Y	-	-	-	-			2015-07-13	4	5	EX5	G4	PREZOEA	-	Y	SHORT	Y	N	Y	IMPAIRED	N
2015-07-13	4	5	CONT5	H4	8	Y	-	-	BROKEN UP	-	-	-	-			2015-07-13	4	5	EX5	H4	ZOEA	-	Y	Y	Y	Y	Y	Y	Y
2015-07-13	4	5	CONT5	A5	ZOEA	-	Y	Y	Y	Y	Y	Y	Y			2015-07-13	4	5	EX5	A5	ZOEA	-	Y	Y	Y	Y	Y	Y	Y
2015-07-13	4	5	CONT5	B5	9	-	Y	-	Y	Y	Y	Y	Y			2015-07-13	4	5	EX5	B5	?	Y	-	-	UNDETERMINED	-	-	-	-
2015-07-13	4	5	CONT5	C5	ZOEA	-	Y	Y	Y	Y	Y	Y	Y			2015-07-13	4	5	EX5	C5	PREZOEA		Y	SHORT	Y	N	Y	IMPAIRED	N
2015-07-13	4	5	CONT5	D5	ZOEA	-	Y	Y	Y	Y	Y	Y	Y			2015-07-13	4	5	EX5	D5	ZOEA	-	-	-	-	-	-	-	-
2015-07-13	4	5	CONT5	E5	ZOEA	-	Y	Y	Y	Y	Y	Y	Y			2015-07-13	4	5	EX5	E5	ZOEA	-	Y	Y	Y	Y	Y	Y	Y
2015-07-13	4	5	CONT5	F5	ZOEA	-	Y	Y	Y	Y	Y	Y	Y			2015-07-13	4	5	EX5	F5	-	-	-	-	-	-	-	-	-
2015-07-13	4	5	CONT5	G5	ZOEA	-	Y	Y	Y	Y	Y	Y	Y			2015-07-13	4	5	EX5	G5	ZOEA	-	Y	Y	Y	Y	Y	Y	Y
2015-07-13	4	5	CONT5	H5	ZOEA	-	Y	Y	Y	Y	Y	Y	Y			2015-07-13	4	5	EX5	H5	ZOEA	-	Y	Y	Y	Y	Y	Y	Y
2015-07-13	4	5	CONT5	A6	ZOEA	-	Y	Y	Y	Y	Y	Y	Y			2015-07-13	4	5	EX5	A6	9	-	Y	-	Y	-	-	-	-
2015-07-13	4	5	CONT5	B6	?	Y	-	-	UNDETERMINED	-	-	-	-			2015-07-13	4	5	EX5	B6	?	Y	-	-	UNDETERMINED	-	-	-	-
2015-07-13	4	5	CONT5	C6	ZOEA	-	Y	Y	Y	Y	Y	Y	Y			2015-07-13	4	5	EX5	C6	9	-	-	-	-	-	-	-	-
2015-07-13	4	5	CONT5	D6	ZOEA	-	Y	Y	Y	Y	Y	Y	Y			2015-07-13	4	5	EX5	D6	ZOEA	-	Y	Y	Y	Y	Y	Y	Y
2015-07-13	4	5	CONT5	E6	ZOEA	-	Y	Y	Y	Y	Y	Y	Y			2015-07-13	4	5	EX5	E6	ZOEA	-	Y	Y	Y	Y	Y	Y	Y
2015-07-13	4	5	CONT5	F6	ZOEA	-	Y	Y	Y	Y	Y	Y	Y			2015-07-13	4	5	EX5	F6	?	Y	-	-	UNDETERMINED	-	-	-	-
2015-07-13	4	5	CONT5	G6	ZOEA	-	Y	Y	Y	Y	Y	Y	Y			2015-07-13	4	5	EX5	G6	ZOEA	-	Y	Y	Y	Y	Y	Y	Y
2015-07-13	4	5	CONT5	H6	?	Y	-	-	UNDETERMINED	-	-	-	-			2015-07-13	4	5	EX5	H6	ZOEA	-	Y	Y	Y	Y	Y	Y	Y

## Sheet: Replicate 5
Date	Replicate #	Day	Plate ID	Well ID	Stage	Cloudy/Dark	Heart beat	Dorsal Spine	Eyes (Full & Bilaterally symmetrical)	Rostrum	Telson	Swimming ablility	Lateral Spines			Date	Replicate #	Day	Plate ID	Well ID	Stage	Cloudy/Dark	Heart beat	Dorsal Spine	Eyes (Full & Bilaterally symmetrical)	Rostrum	Telson	Swimming ablility	Lateral Spines
2015-07-09	5	1	CONT1	A1	3	Y	-	-	NOT PRESENT	-	-	-	-			2015-07-09	5	1	EX1	A1	3	-	-	-	NOT PRESENT	-	-	-	-
2015-07-09	5	1	CONT1	B1	4	-	-	-	NOT PRESENT	-	-	-	-			2015-07-09	5	1	EX1	B1	3	-	-	-	NOT PRESENT	-	-	-	-
2015-07-09	5	1	CONT1	C1	4	-	-	-	NOT PRESENT	-	-	-	-			2015-07-09	5	1	EX1	C1	?	Y	-	-	NOT PRESENT	-	-	-	-
2015-07-09	5	1	CONT1	D1	3	-	-	-	NOT PRESENT	-	-	-	-			2015-07-09	5	1	EX1	D1	3	-	-	-	NOT PRESENT	-	-	-	-
2015-07-09	5	1	CONT1	E1	3	-	-	-	NOT PRESENT	-	-	-	-			2015-07-09	5	1	EX1	E1	3	-	-	-	NOT PRESENT	-	-	-	-
2015-07-09	5	1	CONT1	F1	?	Y	-	-	NOT PRESENT	-	-	-	-			2015-07-09	5	1	EX1	F1	3	Y	-	-	NOT PRESENT	-	-	-	-
2015-07-09	5	1	CONT1	G1	3	-	-	-	NOT PRESENT	-	-	-	-			2015-07-09	5	1	EX1	G1	3	-	-	-	NOT PRESENT	-	-	-	-
2015-07-09	5	1	CONT1	H1	4	-	-	-	NOT PRESENT	-	-	-	-			2015-07-09	5	1	EX1	H1	3	-	-	-	NOT PRESENT	-	-	-	-
2015-07-09	5	1	CONT1	A2	3	-	-	-	NOT PRESENT	-	-	-	-			2015-07-09	5	1	EX1	A2	3	-	-	-	NOT PRESENT	-	-	-	-
2015-07-09	5	1	CONT1	B2	3	-	-	-	NOT PRESENT	-	-	-	-			2015-07-09	5	1	EX1	B2	3	-	-	-	NOT PRESENT	-	-	-	-
2015-07-09	5	1	CONT1	C2	4	-	-	-	NOT PRESENT	-	-	-	-			2015-07-09	5	1	EX1	C2	3	-	-	-	NOT PRESENT	-	-	-	-
2015-07-09	5	1	CONT1	D2	3	-	-	-	NOT PRESENT	-	-	-	-			2015-07-09	5	1	EX1	D2	3	Y	-	-	NOT PRESENT	-	-	-	-
2015-07-09	5	1	CONT1	E2	3	-	-	-	NOT PRESENT	-	-	-	-			2015-07-09	5	1	EX1	E2	3	-	-	-	NOT PRESENT	-	-	-	-
2015-07-09	5	1	CONT1	F2	3	-	-	-	NOT PRESENT	-	-	-	-			2015-07-09	5	1	EX1	F2	4	-	-	-	NOT PRESENT	-	-	-	-
2015-07-09	5	1	CONT1	G2	3	-	-	-	NOT PRESENT	-	-	-	-			2015-07-09	5	1	EX1	G2	3	-	-	-	NOT PRESENT	-	-	-	-
2015-07-09	5	1	CONT1	H2	3	-	-	-	NOT PRESENT	-	-	-	-			2015-07-09	5	1	EX1	H2	3	-	-	-	NOT PRESENT	-	-	-	-
2015-07-09	5	1	CONT1	A3	4	-	-	-	NOT PRESENT	-	-	-	-			2015-07-09	5	1	EX1	A3	3	Y	-	-	NOT PRESENT	-	-	-	-
2015-07-09	5	1	CONT1	B3	3	-	-	-	NOT PRESENT	-	-	-	-			2015-07-09	5	1	EX1	B3	3	-	-	-	NOT PRESENT	-	-	-	-
2015-07-09	5	1	CONT1	C3	3	-	-	-	NOT PRESENT	-	-	-	-			2015-07-09	5	1	EX1	C3	3	-	-	-	NOT PRESENT	-	-	-	-
2015-07-09	5	1	CONT1	D3	4	-	-	-	NOT PRESENT	-	-	-	-			2015-07-09	5	1	EX1	D3	3	-	-	-	NOT PRESENT	-	-	-	-
2015-07-09	5	1	CONT1	E3	3	-	-	-	NOT PRESENT	-	-	-	-			2015-07-09	5	1	EX1	E3	?	Y	-	-	NOT PRESENT	-	-	-	-
2015-07-09	5	1	CONT1	F3	3	-	-	-	NOT PRESENT	-	-	-	-			2015-07-09	5	1	EX1	F3	3	-	-	-	NOT PRESENT	-	-	-	-
2015-07-09	5	1	CONT1	G3	3	-	-	-	NOT PRESENT	-	-	-	-			2015-07-09	5	1	EX1	G3	3	-	-	-	NOT PRESENT	-	-	-	-
2015-07-09	5	1	CONT1	H3	3	-	-	-	NOT PRESENT	-	-	-	-			2015-07-09	5	1	EX1	H3	3	-	-	-	NOT PRESENT	-	-	-	-
2015-07-09	5	1	CONT1	A4	3	-	-	-	NOT PRESENT	-	-	-	-			2015-07-09	5	1	EX1	A4	?	Y	-	-	NOT PRESENT	-	-	-	-
2015-07-09	5	1	CONT1	B4	3	-	-	-	NOT PRESENT	-	-	-	-			2015-07-09	5	1	EX1	B4	3	-	-	-	NOT PRESENT	-	-	-	-
2015-07-09	5	1	CONT1	C4	3	-	-	-	NOT PRESENT	-	-	-	-			2015-07-09	5	1	EX1	C4	3	-	-	-	NOT PRESENT	-	-	-	-
2015-07-09	5	1	CONT1	D4	3	Y	-	-	NOT PRESENT	-	-	-	-			2015-07-09	5	1	EX1	D4	3	Y	-	-	NOT PRESENT	-	-	-	-
2015-07-09	5	1	CONT1	E4	3	-	-	-	NOT PRESENT	-	-	-	-			2015-07-09	5	1	EX1	E4	3	-	-	-	NOT PRESENT	-	-	-	-
2015-07-09	5	1	CONT1	F4	4	-	-	-	NOT PRESENT	-	-	-	-			2015-07-09	5	1	EX1	F4	3	-	-	-	NOT PRESENT	-	-	-	-
2015-07-09	5	1	CONT1	G4	3	-	-	-	NOT PRESENT	-	-	-	-			2015-07-09	5	1	EX1	G4	3	-	-	-	NOT PRESENT	-	-	-	-
2015-07-09	5	1	CONT1	H4	3	-	-	-	NOT PRESENT	-	-	-	-			2015-07-09	5	1	EX1	H4	?	Y	-	-	NOT PRESENT	-	-	-	-
2015-07-09	5	1	CONT1	A5	3	-	-	-	NOT PRESENT	-	-	-	-			2015-07-09	5	1	EX1	A5	3	-	-	-	NOT PRESENT	-	-	-	-
2015-07-09	5	1	CONT1	B5	3	-	-	-	NOT PRESENT	-	-	-	-			2015-07-09	5	1	EX1	B5	3	-	-	-	NOT PRESENT	-	-	-	-
2015-07-09	5	1	CONT1	C5	3	-	-	-	NOT PRESENT	-	-	-	-			2015-07-09	5	1	EX1	C5	3	-	-	-	NOT PRESENT	-	-	-	-
2015-07-09	5	1	CONT1	D5	3	-	-	-	NOT PRESENT	-	-	-	-			2015-07-09	5	1	EX1	D5	3	-	-	-	NOT PRESENT	-	-	-	-
2015-07-09	5	1	CONT1	E5	3	Y	-	-	NOT PRESENT	-	-	-	-			2015-07-09	5	1	EX1	E5	3	-	-	-	NOT PRESENT	-	-	-	-
2015-07-09	5	1	CONT1	F5	3	-	-	-	NOT PRESENT	-	-	-	-			2015-07-09	5	1	EX1	F5	3	-	-	-	NOT PRESENT	-	-	-	-
2015-07-09	5	1	CONT1	G5	3	Y	-	-	NOT PRESENT	-	-	-	-			2015-07-09	5	1	EX1	G5	3	Y	-	-	NOT PRESENT	-	-	-	-
2015-07-09	5	1	CONT1	H5	3	-	-	-	NOT PRESENT	-	-	-	-			2015-07-09	5	1	EX1	H5	3	-	-	-	NOT PRESENT	-	-	-	-
2015-07-09	5	1	CONT1	A6	3	-	-	-	NOT PRESENT	-	-	-	-			2015-07-09	5	1	EX1	A6	3	-	-	-	NOT PRESENT	-	-	-	-
2015-07-09	5	1	CONT1	B6	3	-	-	-	NOT PRESENT	-	-	-	-			2015-07-09	5	1	EX1	B6	3	-	-	-	NOT PRESENT	-	-	-	-
2015-07-09	5	1	CONT1	C6	3	-	-	-	NOT PRESENT	-	-	-	-			2015-07-09	5	1	EX1	C6	3	-	-	-	NOT PRESENT	-	-	-	-
2015-07-09	5	1	CONT1	D6	3	-	-	-	NOT PRESENT	-	-	-	-			2015-07-09	5	1	EX1	D6	3	-	-	-	NOT PRESENT	-	-	-	-
2015-07-09	5	1	CONT1	E6	3	Y	-	-	NOT PRESENT	-	-	-	-			2015-07-09	5	1	EX1	E6	3	-	-	-	NOT PRESENT	-	-	-	-
2015-07-09	5	1	CONT1	F6	3	-	-	-	NOT PRESENT	-	-	-	-			2015-07-09	5	1	EX1	F6	3	-	-	-	NOT PRESENT	-	-	-	-
2015-07-09	5	1	CONT1	G6	3	-	-	-	NOT PRESENT	-	-	-	-			2015-07-09	5	1	EX1	G6	3	-	-	-	NOT PRESENT	-	-	-	-
2015-07-10	5	1	CONT1	H6	3	-	-	-	NOT PRESENT	-	-	-	-			2015-07-09	5	1	EX1	H6	3	-	-	-	NOT PRESENT	-	-	-	-
2015-07-10	5	2	CONT2	A1	4	-	-	-	NOT PRESENT	-	-	-	-			2015-07-10	5	2	EX2	A1	4	-	-	-	NOT PRESENT	-	-	-	-
2015-07-10	5	2	CONT2	B1	4	-	-	-	NOT PRESENT	-	-	-	-			2015-07-10	5	2	EX2	B1	4	-	-	-	NOT PRESENT	-	-	-	-
2015-07-10	5	2	CONT2	C1	?	Y	-	-	NOT PRESENT	-	-	-	-			2015-07-10	5	2	EX2	C1	4	-	-	-	NOT PRESENT	-	-	-	-
2015-07-10	5	2	CONT2	D1	4	-	-	-	NOT PRESENT	-	-	-	-			2015-07-10	5	2	EX2	D1	4	-	-	-	NOT PRESENT	-	-	-	-
2015-07-10	5	2	CONT2	E1	?	Y	-	-	NOT PRESENT	-	-	-	-			2015-07-10	5	2	EX2	E1	4	-	-	-	NOT PRESENT	-	-	-	-
2015-07-10	5	2	CONT2	F1	4	-	-	-	NOT PRESENT	-	-	-	-			2015-07-10	5	2	EX2	F1	4	-	-	-	NOT PRESENT	-	-	-	-
2015-07-10	5	2	CONT2	G1	4	-	-	-	NOT PRESENT	-	-	-	-			2015-07-10	5	2	EX2	G1	4	-	-	-	NOT PRESENT	-	-	-	-
2015-07-10	5	2	CONT2	H1	4	-	-	-	NOT PRESENT	-	-	-	-			2015-07-10	5	2	EX2	H1	4	-	-	-	NOT PRESENT	-	-	-	-
2015-07-10	5	2	CONT2	A2	4	-	-	-	NOT PRESENT	-	-	-	-			2015-07-10	5	2	EX2	A2	4	-	-	-	NOT PRESENT	-	-	-	-
2015-07-10	5	2	CONT2	B2	4	-	-	-	NOT PRESENT	-	-	-	-			2015-07-10	5	2	EX2	B2	4	-	-	-	NOT PRESENT	-	-	-	-
2015-07-10	5	2	CONT2	C2	4	-	-	-	NOT PRESENT	-	-	-	-			2015-07-10	5	2	EX2	C2	?	Y	-	-	NOT PRESENT	-	-	-	-
2015-07-10	5	2	CONT2	D2	4	-	-	-	NOT PRESENT	-	-	-	-			2015-07-10	5	2	EX2	D2	4	-	-	-	NOT PRESENT	-	-	-	-
2015-07-10	5	2	CONT2	E2	3	Y	-	-	NOT PRESENT	-	-	-	-			2015-07-10	5	2	EX2	E2	4	-	-	-	NOT PRESENT	-	-	-	-
2015-07-10	5	2	CONT2	F2	4	-	-	-	NOT PRESENT	-	-	-	-			2015-07-10	5	2	EX2	F2	?	Y	-	-	NOT PRESENT	-	-	-	-
2015-07-10	5	2	CONT2	G2	?	Y	-	-	NOT PRESENT	-	-	-	-			2015-07-10	5	2	EX2	G2	4	-	-	-	NOT PRESENT	-	-	-	-
2015-07-10	5	2	CONT2	H2	4	-	-	-	NOT PRESENT	-	-	-	-			2015-07-10	5	2	EX2	H2	4	-	-	-	NOT PRESENT	-	-	-	-
2015-07-10	5	2	CONT2	A3	4	-	-	-	NOT PRESENT	-	-	-	-			2015-07-10	5	2	EX2	A3	4	-	-	-	NOT PRESENT	-	-	-	-
2015-07-10	5	2	CONT2	B3	4	-	-	-	NOT PRESENT	-	-	-	-			2015-07-10	5	2	EX2	B3	4	-	-	-	NOT PRESENT	-	-	-	-
2015-07-10	5	2	CONT2	C3	4	-	-	-	NOT PRESENT	-	-	-	-			2015-07-10	5	2	EX2	C3	4	-	-	-	NOT PRESENT	-	-	-	-
2015-07-10	5	2	CONT2	D3	?	Y	-	-	NOT PRESENT	-	-	-	-			2015-07-10	5	2	EX2	D3	4	-	-	-	NOT PRESENT	-	-	-	-
2015-07-10	5	2	CONT2	E3	4	-	-	-	NOT PRESENT	-	-	-	-			2015-07-10	5	2	EX2	E3	4	-	-	-	NOT PRESENT	-	-	-	-
2015-07-10	5	2	CONT2	F3	4	-	-	-	NOT PRESENT	-	-	-	-			2015-07-10	5	2	EX2	F3	7	-	-	-	Y	-	-	-	-
2015-07-10	5	2	CONT2	G3	4	-	-	-	NOT PRESENT	-	-	-	-			2015-07-10	5	2	EX2	G3	?	Y	-	-	NOT PRESENT	-	-	-	-
2015-07-10	5	2	CONT2	H3	4	-	-	-	NOT PRESENT	-	-	-	-			2015-07-10	5	2	EX2	H3	?	Y	-	-	NOT PRESENT	-	-	-	-
2015-07-10	5	2	CONT2	A4	?	Y	-	-	NOT PRESENT	-	-	-	-			2015-07-10	5	2	EX2	A4	4	-	-	-	NOT PRESENT	-	-	-	-
2015-07-10	5	2	CONT2	B4	4	-	-	-	NOT PRESENT	-	-	-	-			2015-07-10	5	2	EX2	B4	4	-	-	-	NOT PRESENT	-	-	-	-
2015-07-10	5	2	CONT2	C4	4	-	-	-	NOT PRESENT	-	-	-	-			2015-07-10	5	2	EX2	C4	?	Y	-	-	NOT PRESENT	-	-	-	-
2015-07-10	5	2	CONT2	D4	4	-	-	-	NOT PRESENT	-	-	-	-			2015-07-10	5	2	EX2	D4	4	-	-	-	NOT PRESENT	-	-	-	-
2015-07-10	5	2	CONT2	E4	4	-	-	-	NOT PRESENT	-	-	-	-			2015-07-10	5	2	EX2	E4	?	Y	-	-	NOT PRESENT	-	-	-	-
2015-07-10	5	2	CONT2	F4	?	Y	-	-	NOT PRESENT	-	-	-	-			2015-07-10	5	2	EX2	F4	4	-	-	-	NOT PRESENT	-	-	-	-
2015-07-10	5	2	CONT2	G4	4	-	-	-	NOT PRESENT	-	-	-	-			2015-07-10	5	2	EX2	G4	4	-	-	-	NOT PRESENT	-	-	-	-
2015-07-10	5	2	CONT2	H4	4	-	-	-	NOT PRESENT	-	-	-	-			2015-07-10	5	2	EX2	H4	4	-	-	-	NOT PRESENT	-	-	-	-
2015-07-10	5	2	CONT2	A5	4	-	-	-	NOT PRESENT	-	-	-	-			2015-07-10	5	2	EX2	A5	4	-	-	-	NOT PRESENT	-	-	-	-
2015-07-10	5	2	CONT2	B5	?	Y	-	-	NOT PRESENT	-	-	-	-			2015-07-10	5	2	EX2	B5	4	-	-	-	NOT PRESENT	-	-	-	-
2015-07-10	5	2	CONT2	C5	4	-	-	-	NOT PRESENT	-	-	-	-			2015-07-10	5	2	EX2	C5	?	Y	-	-	NOT PRESENT	-	-	-	-
2015-07-10	5	2	CONT2	D5	4	-	-	-	NOT PRESENT	-	-	-	-			2015-07-10	5	2	EX2	D5	4	-	-	-	NOT PRESENT	-	-	-	-
2015-07-10	5	2	CONT2	E5	4	-	-	-	NOT PRESENT	-	-	-	-			2015-07-10	5	2	EX2	E5	?	Y	-	-	NOT PRESENT	-	-	-	-
2015-07-10	5	2	CONT2	F5	4	-	-	-	NOT PRESENT	-	-	-	-			2015-07-10	5	2	EX2	F5	?	Y	-	-	NOT PRESENT	-	-	-	-
2015-07-10	5	2	CONT2	G5	?	Y	-	-	NOT PRESENT	-	-	-	-			2015-07-10	5	2	EX2	G5	4	-	-	-	NOT PRESENT	-	-	-	-
2015-07-10	5	2	CONT2	H5	4	-	-	-	NOT PRESENT	-	-	-	-			2015-07-10	5	2	EX2	H5	?	Y	-	-	NOT PRESENT	-	-	-	-
2015-07-10	5	2	CONT2	A6	4	-	-	-	NOT PRESENT	-	-	-	-			2015-07-10	5	2	EX2	A6	4	-	-	-	NOT PRESENT	-	-	-	-
2015-07-10	5	2	CONT2	B6	4	-	-	-	NOT PRESENT	-	-	-	-			2015-07-10	5	2	EX2	B6	4	-	-	-	NOT PRESENT	-	-	-	-
2015-07-10	5	2	CONT2	C6	4	-	-	-	NOT PRESENT	-	-	-	-			2015-07-10	5	2	EX2	C6	4	-	-	-	NOT PRESENT	-	-	-	-
2015-07-10	5	2	CONT2	D6	4	-	-	-	NOT PRESENT	-	-	-	-			2015-07-10	5	2	EX2	D6	4	-	-	-	NOT PRESENT	-	-	-	-
2015-07-10	5	2	CONT2	E6	4	-	-	-	NOT PRESENT	-	-	-	-			2015-07-10	5	2	EX2	E6	4	-	-	-	NOT PRESENT	-	-	-	-
2015-07-10	5	2	CONT2	F6	?	Y	-	-	NOT PRESENT	-	-	-	-			2015-07-10	5	2	EX2	F6	4	-	-	-	NOT PRESENT	-	-	-	-
2015-07-10	5	2	CONT2	G6	4	-	-	-	NOT PRESENT	-	-	-	-			2015-07-10	5	2	EX2	G6	4	-	-	-	NOT PRESENT	-	-	-	-
2015-07-11	5	2	CONT2	H6	4	-	-	-	NOT PRESENT	-	-	-	-			2015-07-10	5	2	EX2	H6	4	-	-	-	NOT PRESENT	-	-	-	-
2015-07-11	5	3	CONT3	A1	?	Y	-	-	UNDETERMINED	-	-	-	-			2015-07-11	5	3	EX3	A1	6	-	-	-	Y	-	-	-	-
2015-07-11	5	3	CONT3	B1	?	Y	-	-	UNDETERMINED	-	-	-	-			2015-07-11	5	3	EX3	B1	?	Y	-	-	UNDETERMINED	-	-	-	-
2015-07-11	5	3	CONT3	C1	MISSING	-	-	-	-	-	-	-	-			2015-07-11	5	3	EX3	C1	6	-	-	-	Y	-	-	-	-
2015-07-11	5	3	CONT3	D1	-	Y	-	-	Y	-	-	-	-			2015-07-11	5	3	EX3	D1	?	Y	-	-	UNDETERMINED	-	-	-	-
2015-07-11	5	3	CONT3	E1	6	-	-	-	Y	-	-	-	-			2015-07-11	5	3	EX3	E1	6	-	-	-	Y	-	-	-	-
2015-07-11	5	3	CONT3	F1	6	-	-	-	Y	-	-	-	-			2015-07-11	5	3	EX3	F1	6	-	-	-	Y	-	-	-	-
2015-07-11	5	3	CONT3	G1	?	Y	-	-	UNDETERMINED	-	-	-	-			2015-07-11	5	3	EX3	G1	6	-	-	-	Y	-	-	-	-
2015-07-11	5	3	CONT3	H1	?	Y	-	-	UNDETERMINED	-	-	-	-			2015-07-11	5	3	EX3	H1	6	-	-	-	Y	-	-	-	-
2015-07-11	5	3	CONT3	A2	?	Y	-	-	UNDETERMINED	-	-	-	-			2015-07-11	5	3	EX3	A2	6	-	-	-	Y	-	-	-	-
2015-07-11	5	3	CONT3	B2	3	Y	-	-	NOT PRESENT	-	-	-	-			2015-07-11	5	3	EX3	B2	6	-	-	-	Y	-	-	-	-
2015-07-11	5	3	CONT3	C2	8	-	-	-	Y	-	-	-	-			2015-07-11	5	3	EX3	C2	5	Y	-	-	NOT PRESENT	-	-	-	-
2015-07-11	5	3	CONT3	D2	3	Y	-	-	NOT PRESENT	-	-	-	-			2015-07-11	5	3	EX3	D2	6	-	-	-	Y	-	-	-	-
2015-07-11	5	3	CONT3	E2	6	-	-	-	Y	-	-	-	-			2015-07-11	5	3	EX3	E2	6	-	-	-	Y	-	-	-	-
2015-07-11	5	3	CONT3	F2	?	Y	-	-	UNDETERMINED	-	-	-	-			2015-07-11	5	3	EX3	F2	6	-	-	-	Y	-	-	-	-
2015-07-11	5	3	CONT3	G2	6	-	-	-	Y	-	-	-	-			2015-07-11	5	3	EX3	G2	?	Y	-	-	UNDETERMINED	-	-	-	-
2015-07-11	5	3	CONT3	H2	6	-	-	-	Y	-	-	-	-			2015-07-11	5	3	EX3	H2	6	Y	-	-	BROKEN UP	-	-	-	-
2015-07-11	5	3	CONT3	A3	3	Y	-	-	NOT PRESENT	-	-	-	-			2015-07-11	5	3	EX3	A3	6	-	-	-	Y	-	-	-	-
2015-07-11	5	3	CONT3	B3	3	Y	-	-	NOT PRESENT	-	-	-	-			2015-07-11	5	3	EX3	B3	6	-	-	-	Y	-	-	-	-
2015-07-11	5	3	CONT3	C3	3	Y	-	-	NOT PRESENT	-	-	-	-			2015-07-11	5	3	EX3	C3	?	Y	-	-	UNDETERMINED	-	-	-	-
2015-07-11	5	3	CONT3	D3	3	Y	-	-	NOT PRESENT	-	-	-	-			2015-07-11	5	3	EX3	D3	4	Y	-	-	NOT PRESENT	-	-	-	-
2015-07-11	5	3	CONT3	E3	?	Y	-	-	UNDETERMINED	-	-	-	-			2015-07-11	5	3	EX3	E3	5	Y	-	-	NOT PRESENT	-	-	-	-
2015-07-11	5	3	CONT3	F3	6	-	-	-	Y	-	-	-	-			2015-07-11	5	3	EX3	F3	6	-	-	-	Y	-	-	-	-
2015-07-11	5	3	CONT3	G3	?	Y	-	-	UNDETERMINED	-	-	-	-			2015-07-11	5	3	EX3	G3	?	Y	-	-	UNDETERMINED	-	-	-	-
2015-07-11	5	3	CONT3	H3	?	Y	-	-	UNDETERMINED	-	-	-	-			2015-07-11	5	3	EX3	H3	?	Y	-	-	UNDETERMINED	-	-	-	-
2015-07-11	5	3	CONT3	A4	?	Y	-	-	UNDETERMINED	-	-	-	-			2015-07-11	5	3	EX3	A4	6	-	-	-	Y	-	-	-	-
2015-07-11	5	3	CONT3	B4	5	-	-	-	NOT PRESENT	-	-	-	-			2015-07-11	5	3	EX3	B4	4	Y	-	-	UNDETERMINED	-	-	-	-
2015-07-11	5	3	CONT3	C4	6	-	-	-	Y	-	-	-	-			2015-07-11	5	3	EX3	C4	6	-	-	-	Y	-	-	-	-
2015-07-11	5	3	CONT3	D4	6	-	-	-	Y	-	-	-	-			2015-07-11	5	3	EX3	D4	6	-	-	-	Y	-	-	-	-
2015-07-11	5	3	CONT3	E4	6	-	-	-	Y	-	-	-	-			2015-07-11	5	3	EX3	E4	6	-	-	-	Y	-	-	-	-
2015-07-11	5	3	CONT3	F4	?	Y	-	-	UNDETERMINED	-	-	-	-			2015-07-11	5	3	EX3	F4	6	-	-	-	Y	-	-	-	-
2015-07-11	5	3	CONT3	G4	5	Y	-	-	NOT PRESENT	-	-	-	-			2015-07-11	5	3	EX3	G4	6	-	-	-	Y	-	-	-	-
2015-07-11	5	3	CONT3	H4	6	Y	-	-	BROKEN UP	-	-	-	-			2015-07-11	5	3	EX3	H4	6	-	-	-	Y	-	-	-	-
2015-07-11	5	3	CONT3	A5	?	Y	-	-	UNDETERMINED	-	-	-	-			2015-07-11	5	3	EX3	A5	6	-	-	-	Y	-	-	-	-
2015-07-11	5	3	CONT3	B5	6	-	-	-	Y	-	-	-	-			2015-07-11	5	3	EX3	B5	?	Y	-	-	UNDETERMINED	-	-	-	-
2015-07-11	5	3	CONT3	C5	6	-	-	-	Y	-	-	-	-			2015-07-11	5	3	EX3	C5	?	Y	-	-	UNDETERMINED	-	-	-	-
2015-07-11	5	3	CONT3	D5	?	Y	-	-	UNDETERMINED	-	-	-	-			2015-07-11	5	3	EX3	D5	?	Y	-	-	UNDETERMINED	-	-	-	-
2015-07-11	5	3	CONT3	E5	?	Y	-	-	UNDETERMINED	-	-	-	-			2015-07-11	5	3	EX3	E5	6	-	-	-	Y	-	-	-	-
2015-07-11	5	3	CONT3	F5	?	Y	-	-	UNDETERMINED	-	-	-	-			2015-07-11	5	3	EX3	F5	6	-	-	-	Y	-	-	-	-
2015-07-11	5	3	CONT3	G5	?	Y	-	-	UNDETERMINED	-	-	-	-			2015-07-11	5	3	EX3	G5	5	Y	-	-	NOT PRESENT	-	-	-	-
2015-07-11	5	3	CONT3	H5	6	-	-	-	Y	-	-	-	-			2015-07-11	5	3	EX3	H5	6	-	-	-	Y	-	-	-	-
2015-07-11	5	3	CONT3	A6	4	Y	-	-	NOT PRESENT	-	-	-	-			2015-07-11	5	3	EX3	A6	6	-	-	-	Y	-	-	-	-
2015-07-11	5	3	CONT3	B6	4	Y	-	-	NOT PRESENT	-	-	-	-			2015-07-11	5	3	EX3	B6	6	-	-	-	Y	-	-	-	-
2015-07-11	5	3	CONT3	C6	6	-	-	-	Y	-	-	-	-			2015-07-11	5	3	EX3	C6	6	-	-	-	Y	-	-	-	-
2015-07-11	5	3	CONT3	D6	6	-	-	-	Y	-	-	-	-			2015-07-11	5	3	EX3	D6	6	-	-	-	Y	-	-	-	-
2015-07-11	5	3	CONT3	E6	?	Y	-	-	UNDETERMINED	-	-	-	-			2015-07-11	5	3	EX3	E6	?	Y	-	-	UNDETERMINED	-	-	-	-
2015-07-11	5	3	CONT3	F6	6	-	-	-	Y	-	-	-	-			2015-07-11	5	3	EX3	F6	6	-	-	-	Y	-	-	-	-
2015-07-11	5	3	CONT3	G6	6	-	-	-	Y	-	-	-	-			2015-07-11	5	3	EX3	G6	6	Y	-	-	BROKEN UP	-	-	-	-
2015-07-12	5	3	CONT3	H6	6	-	-	-	Y	-	-	-	-			2015-07-11	5	3	EX3	H6	6	-	-	-	Y	-	-	-	-
2015-07-12	5	4	CONT4	A1	7	-	-	-	Y	-	-	-	-			2015-07-12	5	4	EX4	A1	8	-	-	-	Y	-	-	-	-
2015-07-12	5	4	CONT4	B1	7	-	-	-	Y	-	-	-	-			2015-07-12	5	4	EX4	B1	?	Y	-	-	UNDETERMINED	-	-	-	-
2015-07-12	5	4	CONT4	C1	7	-	-	-	Y	-	-	-	-			2015-07-12	5	4	EX4	C1	7	-	-	-	Y	-	-	-	-
2015-07-12	5	4	CONT4	D1	7	-	-	-	Y	-	-	-	-			2015-07-12	5	4	EX4	D1	7	-	-	-	Y	-	-	-	-
2015-07-12	5	4	CONT4	E1	8	-	-	-	Y	-	-	-	-			2015-07-12	5	4	EX4	E1	?	Y	-	-	UNDETERMINED	-	-	-	-
2015-07-12	5	4	CONT4	F1	7	-	-	-	Y	-	-	-	-			2015-07-12	5	4	EX4	F1	?	Y	-	-	UNDETERMINED	-	-	-	-
2015-07-12	5	4	CONT4	G1	?	Y	-	-	UNDETERMINED	-	-	-	-			2015-07-12	5	4	EX4	G1	8	-	-	-	Y	-	-	-	-
2015-07-12	5	4	CONT4	H1	7	-	-	-	Y	-	-	-	-			2015-07-12	5	4	EX4	H1	7	-	-	-	Y	-	-	-	-
2015-07-12	5	4	CONT4	A2	?	Y	-	-	UNDETERMINED	-	-	-	-			2015-07-12	5	4	EX4	A2	8	-	-	-	Y	-	-	-	-
2015-07-12	5	4	CONT4	B2	?	Y	-	-	UNDETERMINED	-	-	-	-			2015-07-12	5	4	EX4	B2	8	-	-	-	Y	-	-	-	-
2015-07-12	5	4	CONT4	C2	7	-	-	-	Y	-	-	-	-			2015-07-12	5	4	EX4	C2	?	Y	-	-	UNDETERMINED	-	-	-	-
2015-07-12	5	4	CONT4	D2	7	-	-	-	Y	-	-	-	-			2015-07-12	5	4	EX4	D2	7	-	-	-	Y	-	-	-	-
2015-07-12	5	4	CONT4	E2	7	-	-	-	Y	-	-	-	-			2015-07-12	5	4	EX4	E2	8	-	-	-	Y	-	-	-	-
2015-07-12	5	4	CONT4	F2	7	-	-	-	Y	-	-	-	-			2015-07-12	5	4	EX4	F2	8	-	-	-	Y	-	-	-	-
2015-07-12	5	4	CONT4	G2	?	Y	-	-	UNDETERMINED	-	-	-	-			2015-07-12	5	4	EX4	G2	7	-	-	-	Y	-	-	-	-
2015-07-12	5	4	CONT4	H2	?	Y	-	-	UNDETERMINED	-	-	-	-			2015-07-12	5	4	EX4	H2	7	-	-	-	Y	-	-	-	-
2015-07-12	5	4	CONT4	A3	7	-	-	-	Y	-	-	-	-			2015-07-12	5	4	EX4	A3	7	-	-	-	Y	-	-	-	-
2015-07-12	5	4	CONT4	B3	7	-	-	-	Y	-	-	-	-			2015-07-12	5	4	EX4	B3	7	-	-	-	Y	-	-	-	-
2015-07-12	5	4	CONT4	C3	7	-	-	-	Y	-	-	-	-			2015-07-12	5	4	EX4	C3	8	-	-	-	Y	-	-	-	-
2015-07-12	5	4	CONT4	D3	?	Y	-	-	UNDETERMINED	-	-	-	-			2015-07-12	5	4	EX4	D3	7	-	-	-	Y	-	-	-	-
2015-07-12	5	4	CONT4	E3	?	Y	-	-	UNDETERMINED	-	-	-	-			2015-07-12	5	4	EX4	E3	8	-	-	-	Y	-	-	-	-
2015-07-12	5	4	CONT4	F3	?	Y	-	-	UNDETERMINED	-	-	-	-			2015-07-12	5	4	EX4	F3	7	-	-	-	Y	-	-	-	-
2015-07-12	5	4	CONT4	G3	?	Y	-	-	UNDETERMINED	-	-	-	-			2015-07-12	5	4	EX4	G3	7	-	-	-	Y	-	-	-	-
2015-07-12	5	4	CONT4	H3	7	-	-	-	Y	-	-	-	-			2015-07-12	5	4	EX4	H3	7	-	-	-	Y	-	-	-	-
2015-07-12	5	4	CONT4	A4	7	-	-	-	Y	-	-	-	-			2015-07-12	5	4	EX4	A4	?	Y	-	-	UNDETERMINED	-	-	-	-
2015-07-12	5	4	CONT4	B4	7	-	-	-	Y	-	-	-	-			2015-07-12	5	4	EX4	B4	7	-	-	-	Y	-	-	-	-
2015-07-12	5	4	CONT4	C4	7	-	-	-	Y	-	-	-	-			2015-07-12	5	4	EX4	C4	7	-	-	-	Y	-	-	-	-
2015-07-12	5	4	CONT4	D4	7	-	-	-	Y	-	-	-	-			2015-07-12	5	4	EX4	D4	7	-	-	-	Y	-	-	-	-
2015-07-12	5	4	CONT4	E4	7	-	-	-	Y	-	-	-	-			2015-07-12	5	4	EX4	E4	8	-	-	-	Y	-	-	-	-
2015-07-12	5	4	CONT4	F4	?	Y	-	-	UNDETERMINED	-	-	-	-			2015-07-12	5	4	EX4	F4	8	-	-	-	Y	-	-	-	-
2015-07-12	5	4	CONT4	G4	7	-	-	-	Y	-	-	-	-			2015-07-12	5	4	EX4	G4	?	Y	-	-	UNDETERMINED	-	-	-	-
2015-07-12	5	4	CONT4	H4	?	Y	-	-	UNDETERMINED	-	-	-	-			2015-07-12	5	4	EX4	H4	7	-	-	-	Y	-	-	-	-
2015-07-12	5	4	CONT4	A5	7	-	-	-	Y	-	-	-	-			2015-07-12	5	4	EX4	A5	7	-	-	-	Y	-	-	-	-
2015-07-12	5	4	CONT4	B5	7	-	-	-	Y	-	-	-	-			2015-07-12	5	4	EX4	B5	7	-	-	-	Y	-	-	-	-
2015-07-12	5	4	CONT4	C5	7	-	-	-	Y	-	-	-	-			2015-07-12	5	4	EX4	C5	7	-	-	-	Y	-	-	-	-
2015-07-12	5	4	CONT4	D5	7	-	-	-	Y	-	-	-	-			2015-07-12	5	4	EX4	D5	?	Y	-	-	UNDETERMINED	-	-	-	-
2015-07-12	5	4	CONT4	E5	7	-	-	-	Y	-	-	-	-			2015-07-12	5	4	EX4	E5	8	-	-	-	Y	-	-	-	-
2015-07-12	5	4	CONT4	F5	7	-	-	-	Y	-	-	-	-			2015-07-12	5	4	EX4	F5	7	-	-	-	Y	-	-	-	-
2015-07-12	5	4	CONT4	G5	?	Y	-	-	UNDETERMINED	-	-	-	-			2015-07-12	5	4	EX4	G5	7	-	-	-	Y	-	-	-	-
2015-07-12	5	4	CONT4	H5	7	-	-	-	Y	-	-	-	-			2015-07-12	5	4	EX4	H5	?	Y	-	-	UNDETERMINED	-	-	-	-
2015-07-12	5	4	CONT4	A6	7	-	-	-	Y	-	-	-	-			2015-07-12	5	4	EX4	A6	?	Y	-	-	UNDETERMINED	-	-	-	-
2015-07-12	5	4	CONT4	B6	7	-	-	-	Y	-	-	-	-			2015-07-12	5	4	EX4	B6	7	-	-	-	Y	-	-	-	-
2015-07-12	5	4	CONT4	C6	7	-	-	-	Y	-	-	-	-			2015-07-12	5	4	EX4	C6	8	-	-	-	Y	-	-	-	-
2015-07-12	5	4	CONT4	D6	?	Y	-	-	UNDETERMINED	-	-	-	-			2015-07-12	5	4	EX4	D6	?	Y	-	-	UNDETERMINED	-	-	-	-
2015-07-12	5	4	CONT4	E6	7	-	-	-	Y	-	-	-	-			2015-07-12	5	4	EX4	E6	?	Y	-	-	UNDETERMINED	-	-	-	-
2015-07-12	5	4	CONT4	F6	?	Y	-	-	UNDETERMINED	-	-	-	-			2015-07-12	5	4	EX4	F6	7	-	-	-	Y	-	-	-	-
2015-07-12	5	4	CONT4	G6	7	-	-	-	Y	-	-	-	-			2015-07-12	5	4	EX4	G6	7	-	-	-	Y	-	-	-	-
2015-07-13	5	4	CONT4	H6	7	-	-	-	Y	-	-	-	-			2015-07-12	5	4	EX4	H6	7	-	-	-	Y	-	-	-	-
2015-07-13	5	5	CONT5	A1	8	-	-	-	Y	-	-	-	-			2015-07-13	5	5	EX5	A1	9	-	Y	-	Y	-	-	-	-
2015-07-13	5	5	CONT5	B1	8	-	-	-	Y	-	-	-	-			2015-07-13	5	5	EX5	B1	9	-	Y	-	Y	-	-	-	-
2015-07-13	5	5	CONT5	C1	9	-	Y	-	Y	-	-	-	-			2015-07-13	5	5	EX5	C1	?	Y	-	-	-	-	-	-	-
2015-07-13	5	5	CONT5	D1	?	Y	-	-	UNDETERMINED	-	-	-	-			2015-07-13	5	5	EX5	D1	9	-	Y	-	Y	-	-	-	-
2015-07-13	5	5	CONT5	E1	8	-	-	-	Y	-	-	-	-			2015-07-13	5	5	EX5	E1	9	-	Y	-	Y	-	-	-	-
2015-07-13	5	5	CONT5	F1	?	Y	-	-	UNDETERMINED	-	-	-	-			2015-07-13	5	5	EX5	F1	9	-	Y	-	Y	-	-	-	-
2015-07-13	5	5	CONT5	G1	8	-	-	-	Y	-	-	-	-			2015-07-13	5	5	EX5	G1	9	-	Y	-	Y	-	-	-	-
2015-07-13	5	5	CONT5	H1	?	Y	-	-	UNDETERMINED	-	-	-	-			2015-07-13	5	5	EX5	H1	?	Y	-	-	-	-	-	-	-
2015-07-13	5	5	CONT5	A2	8	-	-	-	Y	-	-	-	-			2015-07-13	5	5	EX5	A2	?	Y	-	-	-	-	-	-	-
2015-07-13	5	5	CONT5	B2	?	Y	-	-	UNDETERMINED	-	-	-	-			2015-07-13	5	5	EX5	B2	9	-	Y	-	Y	-	-	-	-
2015-07-13	5	5	CONT5	C2	9	-	Y	-	Y	-	-	-	-			2015-07-13	5	5	EX5	C2	?	Y	-	-	-	-	-	-	-
2015-07-13	5	5	CONT5	D2	9	-	Y	-	Y	-	-	-	-			2015-07-13	5	5	EX5	D2	?	Y	-	-	-	-	-	-	-
2015-07-13	5	5	CONT5	E2	MISSING	-	-	-	-	-	-	-	-			2015-07-13	5	5	EX5	E2	MISSING	-	-	-	-	-	-	-	-
2015-07-13	5	5	CONT5	F2	8	-	-	-	Y	-	-	-	-			2015-07-13	5	5	EX5	F2	9	-	Y	-	Y	-	-	-	-
2015-07-13	5	5	CONT5	G2	8	-	-	-	Y	-	-	-	-			2015-07-13	5	5	EX5	G2	9	-	Y	-	Y	-	-	-	-
2015-07-13	5	5	CONT5	H2	?	Y	-	-	UNDETERMINED	-	-	-	-			2015-07-13	5	5	EX5	H2	9	-	Y	-	Y	-	-	-	-
2015-07-13	5	5	CONT5	A3	8	-	-	-	Y	-	-	-	-			2015-07-13	5	5	EX5	A3	9	-	Y	-	Y	-	-	-	-
2015-07-13	5	5	CONT5	B3	MISSING	-	-	-	-	-	-	-	-			2015-07-13	5	5	EX5	B3	?	Y	-	-	-	-	-	-	-
2015-07-13	5	5	CONT5	C3	9	-	Y	-	Y	-	-	-	-			2015-07-13	5	5	EX5	C3	MISSING	-	-	-	-	-	-	-	-
2015-07-13	5	5	CONT5	D3	6	Y	-	-	BROKEN UP	-	-	-	-			2015-07-13	5	5	EX5	D3	?	Y	-	-	-	-	-	-	-
2015-07-13	5	5	CONT5	E3	?	Y	-	-	UNDETERMINED	-	-	-	-			2015-07-13	5	5	EX5	E3	9	-	Y	-	Y	-	-	-	-
2015-07-13	5	5	CONT5	F3	?	Y	-	-	UNDETERMINED	-	-	-	-			2015-07-13	5	5	EX5	F3	9	-	Y	-	Y	-	-	-	-
2015-07-13	5	5	CONT5	G3	?	Y	-	-	UNDETERMINED	-	-	-	-			2015-07-13	5	5	EX5	G3	?	Y	-	-	-	-	-	-	-
2015-07-13	5	5	CONT5	H3	?	Y	-	-	UNDETERMINED	-	-	-	-			2015-07-13	5	5	EX5	H3	9	-	Y	-	Y	-	-	-	-
2015-07-13	5	5	CONT5	A4	?	Y	-	-	UNDETERMINED	-	-	-	-			2015-07-13	5	5	EX5	A4	9	-	Y	-	Y	-	-	-	-
2015-07-13	5	5	CONT5	B4	?	Y	-	-	UNDETERMINED	-	-	-	-			2015-07-13	5	5	EX5	B4	?	Y	-	-	-	-	-	-	-
2015-07-13	5	5	CONT5	C4	9	-	Y	-	Y	-	-	-	-			2015-07-13	5	5	EX5	C4	9	-	Y	-	Y	-	-	-	-
2015-07-13	5	5	CONT5	D4	8	-	-	-	Y	-	-	-	-			2015-07-13	5	5	EX5	D4	9	-	Y	-	Y	-	-	-	-
2015-07-13	5	5	CONT5	E4	7	Y	-	-	BROKEN UP	-	-	-	-			2015-07-13	5	5	EX5	E4	9	-	Y	-	Y	-	-	-	-
2015-07-13	5	5	CONT5	F4	8	-	-	-	Y	-	-	-	-			2015-07-13	5	5	EX5	F4	9	-	Y	-	Y	-	-	-	-
2015-07-13	5	5	CONT5	G4	9	-	Y	-	Y	-	-	-	-			2015-07-13	5	5	EX5	G4	9	-	Y	-	Y	-	-	-	-
2015-07-13	5	5	CONT5	H4	?	Y	-	-	UNDETERMINED	-	-	-	-			2015-07-13	5	5	EX5	H4	9	-	Y	-	Y	-	-	-	-
2015-07-13	5	5	CONT5	A5	9	-	Y	-	Y	-	-	-	-			2015-07-13	5	5	EX5	A5	9	-	Y	-	Y	-	-	-	-
2015-07-13	5	5	CONT5	B5	9	-	Y	-	Y	-	-	-	-			2015-07-13	5	5	EX5	B5	?	Y	-	-	-	-	-	-	-
2015-07-13	5	5	CONT5	C5	9	-	Y	-	Y	-	-	-	-			2015-07-13	5	5	EX5	C5	9	-	Y	-	Y	-	-	-	-
2015-07-13	5	5	CONT5	D5	?	Y	-	-	UNDETERMINED	-	-	-	-			2015-07-13	5	5	EX5	D5	9	-	Y	-	Y	-	-	-	-
2015-07-13	5	5	CONT5	E5	?	Y	-	-	UNDETERMINED	-	-	-	-			2015-07-13	5	5	EX5	E5	9	-	Y	-	Y	-	-	-	-
2015-07-13	5	5	CONT5	F5	9	-	Y	-	Y	-	-	-	-			2015-07-13	5	5	EX5	F5	?	Y	-	-	-	-	-	-	-
2015-07-13	5	5	CONT5	G5	9	Y	Y	-	Y	-	-	-	-			2015-07-13	5	5	EX5	G5	?	Y	-	-	-	-	-	-	-
2015-07-13	5	5	CONT5	H5	9	-	Y	-	Y	-	-	-	-			2015-07-13	5	5	EX5	H5	9	-	Y	-	Y	-	-	-	-
2015-07-13	5	5	CONT5	A6	8	-	-	-	Y	-	-	-	-			2015-07-13	5	5	EX5	A6	9	-	Y	-	Y	-	-	-	-
2015-07-13	5	5	CONT5	B6	?	Y	-	-	UNDETERMINED	-	-	-	-			2015-07-13	5	5	EX5	B6	?	Y	-	-	-	-	-	-	-
2015-07-13	5	5	CONT5	C6	9	-	Y	-	Y	-	-	-	-			2015-07-13	5	5	EX5	C6	6	Y	-	-	BROKEN UP	-	-	-	-
2015-07-13	5	5	CONT5	D6	?	Y	-	-	UNDETERMINED	-	-	-	-			2015-07-13	5	5	EX5	D6	?	Y	-	-	-	-	-	-	-
2015-07-13	5	5	CONT5	E6	?	Y	-	-	UNDETERMINED	-	-	-	-			2015-07-13	5	5	EX5	E6	9	-	Y	-	Y	-	-	-	-
2015-07-13	5	5	CONT5	F6	9	-	Y	-	Y	-	-	-	-			2015-07-13	5	5	EX5	F6	9	-	Y	-	Y	-	-	-	-
2015-07-13	5	5	CONT5	G6	9	-	Y	-	Y	-	-	-	-			2015-07-13	5	5	EX5	G6	9	-	Y	-	Y	-	-	-	-
2015-07-14	5	5	CONT5	H6	9	-	Y	-	Y	-	-	-	-			2015-07-13	5	5	EX5	H6	9	-	Y	-	Y	-	-	-	-
2015-07-14	5	6	CONT6	A1	8	Y	-	-	BROKEN UP	-	-	-	-			2015-07-14	5	6	EX6	A1	ZOEA	-	Y	Y	Y	Y	Y	Y	Y
2015-07-14	5	6	CONT6	B1	9	-	Y	-	Y	-	-	-	-			2015-07-14	5	6	EX6	B1	?	Y	-	-	UNDETERMINED	-	-	-	-
2015-07-14	5	6	CONT6	C1	ZOEA	-	Y	Y	Y	Y	Y	Y	Y			2015-07-14	5	6	EX6	C1	ZOEA	-	Y	Y	Y	Y	Y	Y	Y
2015-07-14	5	6	CONT6	D1	?	Y	-	-	UNDETERMINED	-	-	-	-			2015-07-14	5	6	EX6	D1	ZOEA	-	Y	Y	Y	Y	Y	Y	Y
2015-07-14	5	6	CONT6	E1	ZOEA	-	Y	Y	Y	Y	Y	Y	Y			2015-07-14	5	6	EX6	E1	8	Y	-	-	Y	-	-	-	-
2015-07-14	5	6	CONT6	F1	?	Y	-	-	UNDETERMINED	-	-	-	-			2015-07-14	5	6	EX6	F1	8	Y	-	-	BROKEN UP	-	-	-	-
2015-07-14	5	6	CONT6	G1	ZOEA	-	Y	Y	Y	Y	Y	Y	Y			2015-07-14	5	6	EX6	G1	?	Y	-	-	UNDETERMINED	-	-	-	-
2015-07-14	5	6	CONT6	H1	?	Y	-	-	UNDETERMINED	-	-	-	-			2015-07-14	5	6	EX6	H1	?	Y	-	-	UNDETERMINED	-	-	-	-
2015-07-14	5	6	CONT6	A2	ZOEA	-	Y	Y	Y	Y	Y	Y	Y			2015-07-14	5	6	EX6	A2	?	Y	-	-	UNDETERMINED	-	-	-	-
2015-07-14	5	6	CONT6	B2	?	Y	-	-	UNDETERMINED	-	-	-	-			2015-07-14	5	6	EX6	B2	8	Y	-	-	BROKEN UP	-	-	-	-
2015-07-14	5	6	CONT6	C2	?	Y	-	-	UNDETERMINED	-	-	-	-			2015-07-14	5	6	EX6	C2	?	Y	-	-	UNDETERMINED	-	-	-	-
2015-07-14	5	6	CONT6	D2	ZOEA	-	Y	Y	Y	Y	Y	Y	Y			2015-07-14	5	6	EX6	D2	8	Y	-	-	Y	-	-	-	-
2015-07-14	5	6	CONT6	E2	?	Y	-	-	UNDETERMINED	-	-	-	-			2015-07-14	5	6	EX6	E2	?	Y	-	-	UNDETERMINED	-	-	-	-
2015-07-14	5	6	CONT6	F2	8	Y	-	-	Y	-	-	-	-			2015-07-14	5	6	EX6	F2	?	Y	-	-	UNDETERMINED	-	-	-	-
2015-07-14	5	6	CONT6	G2	?	Y	-	-	UNDETERMINED	-	-	-	-			2015-07-14	5	6	EX6	G2	8	Y	-	-	BROKEN UP	-	-	-	-
2015-07-14	5	6	CONT6	H2	ZOEA	-	Y	Y	Y	Y	Y	Y	Y			2015-07-14	5	6	EX6	H2	ZOEA	-	Y	Y	Y	Y	Y	Y	Y
2015-07-14	5	6	CONT6	A3	8	Y	-	-	BROKEN UP	-	-	-	-			2015-07-14	5	6	EX6	A3	?	Y	-	-	UNDETERMINED	-	-	-	-
2015-07-14	5	6	CONT6	B3	?	Y	-	-	Y	-	-	-	-			2015-07-14	5	6	EX6	B3	8	Y	-	-	Y	-	-	-	-
2015-07-14	5	6	CONT6	C3	ZOEA	-	Y	Y	Y	Y	Y	Y	Y			2015-07-14	5	6	EX6	C3	?	Y	-	-	UNDETERMINED	-	-	-	-
2015-07-14	5	6	CONT6	D3	?	Y	-	-	UNDETERMINED	-	-	-	-			2015-07-14	5	6	EX6	D3	PREZOEA	-	Y	N	Y	N	Y	IMPAIRED	N
2015-07-14	5	6	CONT6	E3	MISSING	-	-	-	-	-	-	-	-			2015-07-14	5	6	EX6	E3	8	Y	-	-	BROKEN UP	-	-	-	-
2015-07-14	5	6	CONT6	F3	?	Y	-	-	UNDETERMINED	-	-	-	-			2015-07-14	5	6	EX6	F3	ZOEA	-	Y	Y	Y	Y	Y	Y	Y
2015-07-14	5	6	CONT6	G3	?	Y	-	-	UNDETERMINED	-	-	-	-			2015-07-14	5	6	EX6	G3	PREZOEA	-	Y	N	Y	N	Y	IMPAIRED	N
2015-07-14	5	6	CONT6	H3	?	Y	-	-	UNDETERMINED	-	-	-	-			2015-07-14	5	6	EX6	H3	?	Y	-	-	UNDETERMINED	-	-	-	-
2015-07-14	5	6	CONT6	A4	?	Y	-	-	UNDETERMINED	-	-	-	-			2015-07-14	5	6	EX6	A4	ZOEA	-	Y	Y	Y	Y	Y	Y	Y
2015-07-14	5	6	CONT6	B4	?	Y	-	-	UNDETERMINED	-	-	-	-			2015-07-14	5	6	EX6	B4	8	Y	-	-	BROKEN UP	-	-	-	-
2015-07-14	5	6	CONT6	C4	8	Y	-	-	BROKEN UP	-	-	-	-			2015-07-14	5	6	EX6	C4	ZOEA	-	Y	Y	Y	Y	Y	Y	Y
2015-07-14	5	6	CONT6	D4	?	Y	-	-	UNDETERMINED	-	-	-	-			2015-07-14	5	6	EX6	D4	?	Y	-	-	UNDETERMINED	-	-	-	-
2015-07-14	5	6	CONT6	E4	8	Y	-	-	Y	-	-	-	-			2015-07-14	5	6	EX6	E4	?	Y	-	-	UNDETERMINED	-	-	-	-
2015-07-14	5	6	CONT6	F4	8	Y	-	-	Y	-	-	-	-			2015-07-14	5	6	EX6	F4	ZOEA	-	Y	Y	Y	Y	Y	Y	Y
2015-07-14	5	6	CONT6	G4	8	Y	-	-	BROKEN UP	-	-	-	-			2015-07-14	5	6	EX6	G4	PREZOEA	-	Y	N	Y	N	Y	IMPAIRED	N
2015-07-14	5	6	CONT6	H4	ZOEA	-	Y	Y	Y	Y	Y	Y	Y			2015-07-14	5	6	EX6	H4	?	Y	-	-	UNDETERMINED	-	-	-	-
2015-07-14	5	6	CONT6	A5	?	Y	-	-	UNDETERMINED	-	-	-	-			2015-07-14	5	6	EX6	A5	PREZOEA	-	Y	N	Y	N	Y	IMPAIRED	N
2015-07-14	5	6	CONT6	B5	8	Y	-	-	Y	-	-	-	-			2015-07-14	5	6	EX6	B5	PREZOEA	-	Y	N	Y	N	Y	IMPAIRED	N
2015-07-14	5	6	CONT6	C5	8	Y	-	-	BROKEN UP	-	-	-	-			2015-07-14	5	6	EX6	C5	8	Y	-	-	BROKEN UP	-	-	-	-
2015-07-14	5	6	CONT6	D5	ZOEA	-	Y	Y	Y	Y	Y	Y	Y			2015-07-14	5	6	EX6	D5	?	Y	-	-	UNDETERMINED	-	-	-	-
2015-07-14	5	6	CONT6	E5	ZOEA	-	Y	Y	Y	Y	Y	Y	Y			2015-07-14	5	6	EX6	E5	?	Y	-	-	UNDETERMINED	-	-	-	-
2015-07-14	5	6	CONT6	F5	?	Y	-	-	UNDETERMINED	-	-	-	-			2015-07-14	5	6	EX6	F5	?	Y	-	-	UNDETERMINED	-	-	-	-
2015-07-14	5	6	CONT6	G5	ZOEA	-	Y	Y	Y	Y	Y	Y	Y			2015-07-14	5	6	EX6	G5	?	Y	-	-	UNDETERMINED	-	-	-	-
2015-07-14	5	6	CONT6	H5	?	Y	-	-	UNDETERMINED	-	-	-	-			2015-07-14	5	6	EX6	H5	?	Y	-	-	UNDETERMINED	-	-	-	-
2015-07-14	5	6	CONT6	A6	?	Y	-	-	UNDETERMINED	-	-	-	-			2015-07-14	5	6	EX6	A6	?	Y	-	-	UNDETERMINED	-	-	-	-
2015-07-14	5	6	CONT6	B6	8	Y	-	-	BROKEN UP	-	-	-	-			2015-07-14	5	6	EX6	B6	?	Y	-	-	UNDETERMINED	-	-	-	-
2015-07-14	5	6	CONT6	C6	PREZOEA	-	Y	N	Y	N	Y	IMPAIRED	N			2015-07-14	5	6	EX6	C6	?	Y	-	-	UNDETERMINED	-	-	-	-
2015-07-14	5	6	CONT6	D6	?	Y	-	-	UNDETERMINED	-	-	-	-			2015-07-14	5	6	EX6	D6	8	Y	-	-	Y	-	-	-	-
2015-07-14	5	6	CONT6	E6	ZOEA	-	Y	Y	Y	Y	Y	Y	Y			2015-07-14	5	6	EX6	E6	?	Y	-	-	UNDETERMINED	-	-	-	-
2015-07-14	5	6	CONT6	F6	?	Y	-	-	UNDETERMINED	-	-	-	-			2015-07-14	5	6	EX6	F6	ZOEA	-	Y	Y	Y	Y	Y	Y	Y
2015-07-14	5	6	CONT6	G6	ZOEA	-	Y	Y	Y	Y	Y	Y	Y			2015-07-14	5	6	EX6	G6	?	Y	-	-	UNDETERMINED	-	-	-	-
2015-07-23	5	6	CONT6	H6	?	Y	-	-	UNDETERMINED	-	-	-	-			2015-07-14	5	6	EX6	H6	?	Y	-	-	UNDETERMINED	-	-	-	-

## Sheet: Replicate 6
Date	Replicate #	Day	Plate ID	Well ID	Stage	Cloudy/Dark	Heart beat	Dorsal Spine	Eyes (Full & Bilaterally symmetrical)	Rostrum	Telson	Swimming ablility	Lateral Spines			Date	Replicate #	Day	Plate ID	Well ID	Stage	Cloudy/Dark	Heart beat	Dorsal Spine	Eyes (Full & Bilaterally symmetrical)	Rostrum	Telson	Swimming ablility	Lateral Spines
2015-07-23	6	1	Cont1	A1	6	-	-	-	Y	-	-	-	-			2015-07-23	6	1	EX1	A1	6	-	-	-	Y	-	-	-	-
2015-07-23	6	1	Cont1	B1	6	-	-	-	Y	-	-	-	-			2015-07-23	6	1	EX1	B1	5	Y	-	-	NOT PRESENT	-	-	-	-
2015-07-23	6	1	Cont1	C1	6	-	-	-	Y	-	-	-	-			2015-07-23	6	1	EX1	C1	6	-	-	-	Y	-	-	-	-
2015-07-23	6	1	Cont1	D1	5	-	-	-	NOT PRESENT	-	-	-	-			2015-07-23	6	1	EX1	D1	5	Y	-	-	NOT PRESENT	-	-	-	-
2015-07-23	6	1	Cont1	E1	6	-	-	-	Y	-	-	-	-			2015-07-23	6	1	EX1	E1	6	-	-	-	Y	-	-	-	-
2015-07-23	6	1	Cont1	F1	6	-	-	-	Y	-	-	-	-			2015-07-23	6	1	EX1	F1	6	-	-	-	Y	-	-	-	-
2015-07-23	6	1	Cont1	G1	6	-	-	-	Y	-	-	-	-			2015-07-23	6	1	EX1	G1	6	-	-	-	Y	-	-	-	-
2015-07-23	6	1	Cont1	H1	6	-	-	-	Y	-	-	-	-			2015-07-23	6	1	EX1	H1	6	-	-	-	Y	-	-	-	-
2015-07-23	6	1	Cont1	A2	5	-	-	-	NOT PRESENT	-	-	-	-			2015-07-23	6	1	EX1	A2	6	-	-	-	Y	-	-	-	-
2015-07-23	6	1	Cont1	B2	6	-	-	-	Y	-	-	-	-			2015-07-23	6	1	EX1	B2	6	-	-	-	Y	-	-	-	-
2015-07-23	6	1	Cont1	C2	5	-	-	-	NOT PRESENT	-	-	-	-			2015-07-23	6	1	EX1	C2	6	-	-	-	Y	-	-	-	-
2015-07-23	6	1	Cont1	D2	5	-	-	-	NOT PRESENT	-	-	-	-			2015-07-23	6	1	EX1	D2	?	Y	-	-	UNDETERMINED	-	-	-	-
2015-07-23	6	1	Cont1	E2	6	-	-	-	Y	-	-	-	-			2015-07-23	6	1	EX1	E2	5	Y	-	-	NOT PRESENT	-	-	-	-
2015-07-23	6	1	Cont1	F2	6	-	-	-	Y	-	-	-	-			2015-07-23	6	1	EX1	F2	6	-	-	-	Y	-	-	-	-
2015-07-23	6	1	Cont1	G2	5	-	-	-	NOT PRESENT	-	-	-	-			2015-07-23	6	1	EX1	G2	6	-	-	-	Y	-	-	-	-
2015-07-23	6	1	Cont1	H2	6	-	-	-	Y	-	-	-	-			2015-07-23	6	1	EX1	H2	6	-	-	-	Y	-	-	-	-
2015-07-23	6	1	Cont1	A3	6	-	-	-	Y	-	-	-	-			2015-07-23	6	1	EX1	A3	5	-	-	-	NOT PRESENT	-	-	-	-
2015-07-23	6	1	Cont1	B3	6	-	-	-	Y	-	-	-	-			2015-07-23	6	1	EX1	B3	6	-	-	-	Y	-	-	-	-
2015-07-23	6	1	Cont1	C3	6	-	-	-	Y	-	-	-	-			2015-07-23	6	1	EX1	C3	6	-	-	-	Y	-	-	-	-
2015-07-23	6	1	Cont1	D3	?	Y	-	-	UNDETERMINED	-	-	-	-			2015-07-23	6	1	EX1	D3	6	-	-	-	Y	-	-	-	-
2015-07-23	6	1	Cont1	E3	6	-	-	-	Y	-	-	-	-			2015-07-23	6	1	EX1	E3	6	-	-	-	Y	-	-	-	-
2015-07-23	6	1	Cont1	F3	6	-	-	-	Y	-	-	-	-			2015-07-23	6	1	EX1	F3	6	-	-	-	Y	-	-	-	-
2015-07-23	6	1	Cont1	G3	5	Y	-	-	NOT PRESENT	-	-	-	-			2015-07-23	6	1	EX1	G3	6	-	-	-	Y	-	-	-	-
2015-07-23	6	1	Cont1	H3	5	Y	-	-	NOT PRESENT	-	-	-	-			2015-07-23	6	1	EX1	H3	6	-	-	-	Y	-	-	-	-
2015-07-23	6	1	Cont1	A4	5	Y	-	-	NOT PRESENT	-	-	-	-			2015-07-23	6	1	EX1	A4	6	-	-	-	Y	-	-	-	-
2015-07-23	6	1	Cont1	B4	5	-	-	-	NOT PRESENT	-	-	-	-			2015-07-23	6	1	EX1	B4	?	Y	-	-	UNDETERMINED	-	-	-	-
2015-07-23	6	1	Cont1	C4	6	-	-	-	Y	-	-	-	-			2015-07-23	6	1	EX1	C4	?	Y	-	-	UNDETERMINED	-	-	-	-
2015-07-23	6	1	Cont1	D4	6	-	-	-	Y	-	-	-	-			2015-07-23	6	1	EX1	D4	6	-	-	-	Y	-	-	-	-
2015-07-23	6	1	Cont1	E4	6	-	-	-	Y	-	-	-	-			2015-07-23	6	1	EX1	E4	?	Y	-	-	UNDETERMINED	-	-	-	-
2015-07-23	6	1	Cont1	F4	6	-	-	-	Y	-	-	-	-			2015-07-23	6	1	EX1	F4	?	Y	-	-	UNDETERMINED	-	-	-	-
2015-07-23	6	1	Cont1	G4	6	-	-	-	Y	-	-	-	-			2015-07-23	6	1	EX1	G4	6	-	-	-	Y	-	-	-	-
2015-07-23	6	1	Cont1	H4	6	-	-	-	Y	-	-	-	-			2015-07-23	6	1	EX1	H4	6	-	-	-	Y	-	-	-	-
2015-07-23	6	1	Cont1	A5	6	-	-	-	Y	-	-	-	-			2015-07-23	6	1	EX1	A5	6	-	-	-	Y	-	-	-	-
2015-07-23	6	1	Cont1	B5	?	Y	-	-	UNDETERMINED	-	-	-	-			2015-07-23	6	1	EX1	B5	6	-	-	-	Y	-	-	-	-
2015-07-23	6	1	Cont1	C5	6	-	-	-	Y	-	-	-	-			2015-07-23	6	1	EX1	C5	6	-	-	-	Y	-	-	-	-
2015-07-23	6	1	Cont1	D5	6	-	-	-	Y	-	-	-	-			2015-07-23	6	1	EX1	D5	6	-	-	-	Y	-	-	-	-
2015-07-23	6	1	Cont1	E5	6	-	-	-	Y	-	-	-	-			2015-07-23	6	1	EX1	E5	6	-	-	-	Y	-	-	-	-
2015-07-23	6	1	Cont1	F5	6	-	-	-	Y	-	-	-	-			2015-07-23	6	1	EX1	F5	6	-	-	-	Y	-	-	-	-
2015-07-23	6	1	Cont1	G5	?	Y	-	-	UNDETERMINED	-	-	-	-			2015-07-23	6	1	EX1	G5	6	-	-	-	Y	-	-	-	-
2015-07-23	6	1	Cont1	H5	6	-	-	-	Y	-	-	-	-			2015-07-23	6	1	EX1	H5	?	Y	-	-	UNDETERMINED	-	-	-	-
2015-07-23	6	1	Cont1	A6	6	-	-	-	Y	-	-	-	-			2015-07-23	6	1	EX1	A6	6	-	-	-	Y	-	-	-	-
2015-07-23	6	1	Cont1	B6	6	-	-	-	Y	-	-	-	-			2015-07-23	6	1	EX1	B6	6	-	-	-	Y	-	-	-	-
2015-07-23	6	1	Cont1	C6	6	-	-	-	Y	-	-	-	-			2015-07-23	6	1	EX1	C6	6	-	-	-	Y	-	-	-	-
2015-07-23	6	1	Cont1	D6	6	-	-	-	Y	-	-	-	-			2015-07-23	6	1	EX1	D6	6	-	-	-	Y	-	-	-	-
2015-07-23	6	1	Cont1	E6	6	-	-	-	Y	-	-	-	-			2015-07-23	6	1	EX1	E6	6	-	-	-	Y	-	-	-	-
2015-07-23	6	1	Cont1	F6	6	-	-	-	Y	-	-	-	-			2015-07-23	6	1	EX1	F6	6	-	-	-	Y	-	-	-	-
2015-07-23	6	1	Cont1	G6	6	-	-	-	Y	-	-	-	-			2015-07-23	6	1	EX1	G6	6	-	-	-	Y	-	-	-	-
2015-07-24	6	1	Cont1	H6	5	Y	-	-	NOT PRESENT	-	-	-	-			2015-07-23	6	1	EX1	H6	6	-	-	-	Y	-	-	-	-
2015-07-24	6	2	CONT2	A1	7	-	-	-	Y	-	-	-	-			2015-07-24	6	2	EX2	A1	8	-	-	-	Y	-	-	-	-
2015-07-24	6	2	CONT2	B1	7	-	-	-	Y	-	-	-	-			2015-07-24	6	2	EX2	B1	7	-	-	-	Y	-	-	-	-
2015-07-24	6	2	CONT2	C1	7	-	-	-	Y	-	-	-	-			2015-07-24	6	2	EX2	C1	7	-	-	-	Y	-	-	-	-
2015-07-24	6	2	CONT2	D1	?	Y	-	-	UNDETERMINED	-	-	-	-			2015-07-24	6	2	EX2	D1	8	-	-	-	Y	-	-	-	-
2015-07-24	6	2	CONT2	E1	7	-	-	-	Y	-	-	-	-			2015-07-24	6	2	EX2	E1	7	-	-	-	Y	-	-	-	-
2015-07-24	6	2	CONT2	F1	6	Y	-	-	BROKEN UP	-	-	-	-			2015-07-24	6	2	EX2	F1	7	-	-	-	Y	-	-	-	-
2015-07-24	6	2	CONT2	G1	7	-	-	-	Y	-	-	-	-			2015-07-24	6	2	EX2	G1	7	-	-	-	Y	-	-	-	-
2015-07-24	6	2	CONT2	H1	7	-	-	-	Y	-	-	-	-			2015-07-24	6	2	EX2	H1	7	-	-	-	Y	-	-	-	-
2015-07-24	6	2	CONT2	A2	8	-	-	-	Y	-	-	-	-			2015-07-24	6	2	EX2	A2	7	-	-	-	Y	-	-	-	-
2015-07-24	6	2	CONT2	B2	7	-	-	-	Y	-	-	-	-			2015-07-24	6	2	EX2	B2	7	-	-	-	Y	-	-	-	-
2015-07-24	6	2	CONT2	C2	7	-	-	-	Y	-	-	-	-			2015-07-24	6	2	EX2	C2	7	-	-	-	Y	-	-	-	-
2015-07-24	6	2	CONT2	D2	7	-	-	-	Y	-	-	-	-			2015-07-24	6	2	EX2	D2	7	-	-	-	Y	-	-	-	-
2015-07-24	6	2	CONT2	E2	7	-	-	-	Y	-	-	-	-			2015-07-24	6	2	EX2	E2	8	-	-	-	Y	-	-	-	-
2015-07-24	6	2	CONT2	F2	7	-	-	-	Y	-	-	-	-			2015-07-24	6	2	EX2	F2	7	-	-	-	Y	-	-	-	-
2015-07-24	6	2	CONT2	G2	7	-	-	-	Y	-	-	-	-			2015-07-24	6	2	EX2	G2	?	Y	-	-	UNDETERMINED	-	-	-	-
2015-07-24	6	2	CONT2	H2	7	-	-	-	Y	-	-	-	-			2015-07-24	6	2	EX2	H2	7	-	-	-	Y	-	-	-	-
2015-07-24	6	2	CONT2	A3	7	-	-	-	Y	-	-	-	-			2015-07-24	6	2	EX2	A3	7	-	-	-	Y	-	-	-	-
2015-07-24	6	2	CONT2	B3	7	-	-	-	Y	-	-	-	-			2015-07-24	6	2	EX2	B3	7	-	-	-	Y	-	-	-	-
2015-07-24	6	2	CONT2	C3	?	Y	-	-	UNDETERMINED	-	-	-	-			2015-07-24	6	2	EX2	C3	7	-	-	-	Y	-	-	-	-
2015-07-24	6	2	CONT2	D3	7	-	-	-	Y	-	-	-	-			2015-07-24	6	2	EX2	D3	7	-	-	-	Y	-	-	-	-
2015-07-24	6	2	CONT2	E3	6	-	-	-	Y	-	-	-	-			2015-07-24	6	2	EX2	E3	8	-	-	-	Y	-	-	-	-
2015-07-24	6	2	CONT2	F3	8	-	-	-	Y	-	-	-	-			2015-07-24	6	2	EX2	F3	7	-	-	-	Y	-	-	-	-
2015-07-24	6	2	CONT2	G3	7	-	-	-	Y	-	-	-	-			2015-07-24	6	2	EX2	G3	7	-	-	-	Y	-	-	-	-
2015-07-24	6	2	CONT2	H3	8	-	-	-	Y	-	-	-	-			2015-07-24	6	2	EX2	H3	7	-	-	-	Y	-	-	-	-
2015-07-24	6	2	CONT2	A4	?	Y	-	-	UNDETERMINED	-	-	-	-			2015-07-24	6	2	EX2	A4	7	-	-	-	Y	-	-	-	-
2015-07-24	6	2	CONT2	B4	7	-	-	-	Y	-	-	-	-			2015-07-24	6	2	EX2	B4	7	-	-	-	Y	-	-	-	-
2015-07-24	6	2	CONT2	C4	7	-	-	-	Y	-	-	-	-			2015-07-24	6	2	EX2	C4	8	-	-	-	Y	-	-	-	-
2015-07-24	6	2	CONT2	D4	?	Y	-	-	UNDETERMINED	-	-	-	-			2015-07-24	6	2	EX2	D4	7	-	-	-	Y	-	-	-	-
2015-07-24	6	2	CONT2	E4	7	-	-	-	Y	-	-	-	-			2015-07-24	6	2	EX2	E4	7	-	-	-	Y	-	-	-	-
2015-07-24	6	2	CONT2	F4	7	-	-	-	Y	-	-	-	-			2015-07-24	6	2	EX2	F4	7	-	-	-	Y	-	-	-	-
2015-07-24	6	2	CONT2	G4	7	-	-	-	Y	-	-	-	-			2015-07-24	6	2	EX2	G4	7	-	-	-	Y	-	-	-	-
2015-07-24	6	2	CONT2	H4	7	-	-	-	Y	-	-	-	-			2015-07-24	6	2	EX2	H4	7	-	-	-	Y	-	-	-	-
2015-07-24	6	2	CONT2	A5	?	Y	-	-	UNDETERMINED	-	-	-	-			2015-07-24	6	2	EX2	A5	?	Y	-	-	UNDETERMINED	-	-	-	-
2015-07-24	6	2	CONT2	B5	?	Y	-	-	UNDETERMINED	-	-	-	-			2015-07-24	6	2	EX2	B5	?	Y	-	-	UNDETERMINED	-	-	-	-
2015-07-24	6	2	CONT2	C5	7	-	-	-	Y	-	-	-	-			2015-07-24	6	2	EX2	C5	7	-	-	-	Y	-	-	-	-
2015-07-24	6	2	CONT2	D5	7	-	-	-	Y	-	-	-	-			2015-07-24	6	2	EX2	D5	7	-	-	-	Y	-	-	-	-
2015-07-24	6	2	CONT2	E5	?	Y	-	-	UNDETERMINED	-	-	-	-			2015-07-24	6	2	EX2	E5	?	Y	-	-	UNDETERMINED	-	-	-	-
2015-07-24	6	2	CONT2	F5	7	-	-	-	Y	-	-	-	-			2015-07-24	6	2	EX2	F5	7	-	-	-	Y	-	-	-	-
2015-07-24	6	2	CONT2	G5	8	-	-	-	Y	-	-	-	-			2015-07-24	6	2	EX2	G5	8	-	-	-	Y	-	-	-	-
2015-07-24	6	2	CONT2	H5	7	-	-	-	Y	-	-	-	-			2015-07-24	6	2	EX2	H5	7	-	-	-	Y	-	-	-	-
2015-07-24	6	2	CONT2	A6	7	-	-	-	Y	-	-	-	-			2015-07-24	6	2	EX2	A6	7	-	-	-	Y	-	-	-	-
2015-07-24	6	2	CONT2	B6	7	-	-	-	Y	-	-	-	-			2015-07-24	6	2	EX2	B6	7	-	-	-	Y	-	-	-	-
2015-07-24	6	2	CONT2	C6	7	-	-	-	Y	-	-	-	-			2015-07-24	6	2	EX2	C6	7	-	-	-	Y	-	-	-	-
2015-07-24	6	2	CONT2	D6	8	-	-	-	Y	-	-	-	-			2015-07-24	6	2	EX2	D6	8	-	-	-	Y	-	-	-	-
2015-07-24	6	2	CONT2	E6	?	Y	-	-	UNDETERMINED	-	-	-	-			2015-07-24	6	2	EX2	E6	?	Y	-	-	UNDETERMINED	-	-	-	-
2015-07-24	6	2	CONT2	F6	7	-	-	-	Y	-	-	-	-			2015-07-24	6	2	EX2	F6	7	-	-	-	Y	-	-	-	-
2015-07-24	6	2	CONT2	G6	7	-	-	-	Y	-	-	-	-			2015-07-24	6	2	EX2	G6	7	-	-	-	Y	-	-	-	-
2015-07-25	6	2	CONT2	H6	7	-	-	-	Y	-	-	-	-			2015-07-24	6	2	EX2	H6	7	-	-	-	Y	-	-	-	-
2015-07-25	6	3	CONT3	A1	9	-	Y	-	Y	-	-	-	-			2015-07-25	6	3	EX3	A1	9	-	Y	-	Y	-	-	-	-
2015-07-25	6	3	CONT3	B1	9	-	Y	-	Y	-	-	-	-			2015-07-25	6	3	EX3	B1	9	-	Y	-	Y	-	-	-	-
2015-07-25	6	3	CONT3	C1	9	-	Y	-	Y	-	-	-	-			2015-07-25	6	3	EX3	C1	9	-	Y	-	Y	-	-	-	-
2015-07-25	6	3	CONT3	D1	9	-	Y	-	Y	-	-	-	-			2015-07-25	6	3	EX3	D1	9	-	Y	-	Y	-	-	-	-
2015-07-25	6	3	CONT3	E1	8	-	-	-	Y	-	-	-	-			2015-07-25	6	3	EX3	E1	9	-	Y	-	Y	-	-	-	-
2015-07-25	6	3	CONT3	F1	9	-	Y	-	Y	-	-	-	-			2015-07-25	6	3	EX3	F1	9	-	Y	-	Y	-	-	-	-
2015-07-25	6	3	CONT3	G1	?	Y	-	-	UNDETERMINED	-	-	-	-			2015-07-25	6	3	EX3	G1	9	-	Y	-	Y	-	-	-	-
2015-07-25	6	3	CONT3	H1	MISSING	-	-	-	-	-	-	-	-			2015-07-25	6	3	EX3	H1	9	-	Y	-	Y	-	-	-	-
2015-07-25	6	3	CONT3	A2	9	-	Y	-	Y	-	-	-	-			2015-07-25	6	3	EX3	A2	9	-	Y	-	Y	-	-	-	-
2015-07-25	6	3	CONT3	B2	9	-	Y	-	Y	-	-	-	-			2015-07-25	6	3	EX3	B2	9	-	Y	-	Y	-	-	-	-
2015-07-25	6	3	CONT3	C2	?	Y	-	-	UNDETERMINED	-	-	-	-			2015-07-25	6	3	EX3	C2	9	-	Y	-	Y	-	-	-	-
2015-07-25	6	3	CONT3	D2	?	Y	-	-	UNDETERMINED	-	-	-	-			2015-07-25	6	3	EX3	D2	9	-	Y	-	Y	-	-	-	-
2015-07-25	6	3	CONT3	E2	9	-	Y	-	Y	-	-	-	-			2015-07-25	6	3	EX3	E2	9	-	Y	-	Y	-	-	-	-
2015-07-25	6	3	CONT3	F2	9	-	Y	-	Y	-	-	-	-			2015-07-25	6	3	EX3	F2	9	-	Y	-	Y	-	-	-	-
2015-07-25	6	3	CONT3	G2	9	-	Y	-	Y	-	-	-	-			2015-07-25	6	3	EX3	G2	9	-	Y	-	Y	-	-	-	-
2015-07-25	6	3	CONT3	H2	?	Y	-	-	UNDETERMINED	-	-	-	-			2015-07-25	6	3	EX3	H2	?	Y	-	-	UNDETERMINED	-	-	-	-
2015-07-25	6	3	CONT3	A3	9	-	Y	-	Y	-	-	-	-			2015-07-25	6	3	EX3	A3	9	-	Y	-	Y	-	-	-	-
2015-07-25	6	3	CONT3	B3	9	-	Y	-	Y	-	-	-	-			2015-07-25	6	3	EX3	B3	9	-	Y	-	Y	-	-	-	-
2015-07-25	6	3	CONT3	C3	?	Y	-	-	UNDETERMINED	-	-	-	-			2015-07-25	6	3	EX3	C3	9	-	Y	-	Y	-	-	-	-
2015-07-25	6	3	CONT3	D3	7	Y	-	-	BROKEN UP	-	-	-	-			2015-07-25	6	3	EX3	D3	?	Y	-	-	UNDETERMINED	-	-	-	-
2015-07-25	6	3	CONT3	E3	9	-	Y	-	Y	-	-	-	-			2015-07-25	6	3	EX3	E3	9	-	Y	-	Y	-	-	-	-
2015-07-25	6	3	CONT3	F3	?	Y	-	-	UNDETERMINED	-	-	-	-			2015-07-25	6	3	EX3	F3	9	-	Y	-	Y	-	-	-	-
2015-07-25	6	3	CONT3	G3	9	-	Y	-	Y	-	-	-	-			2015-07-25	6	3	EX3	G3	9	-	Y	-	Y	-	-	-	-
2015-07-25	6	3	CONT3	H3	9	-	Y	-	Y	-	-	-	-			2015-07-25	6	3	EX3	H3	9	-	Y	-	Y	-	-	-	-
2015-07-25	6	3	CONT3	A4	9	-	Y	-	Y	-	-	-	-			2015-07-25	6	3	EX3	A4	9	-	Y	-	Y	-	-	-	-
2015-07-25	6	3	CONT3	B4	8	-	-	-	Y	-	-	-	-			2015-07-25	6	3	EX3	B4	9	-	Y	-	Y	-	-	-	-
2015-07-25	6	3	CONT3	C4	9	-	Y	-	Y	-	-	-	-			2015-07-25	6	3	EX3	C4	9	-	Y	-	Y	-	-	-	-
2015-07-25	6	3	CONT3	D4	9	-	Y	-	Y	-	-	-	-			2015-07-25	6	3	EX3	D4	?	Y	-	-	UNDETERMINED	-	-	-	-
2015-07-25	6	3	CONT3	E4	9	-	Y	-	Y	-	-	-	-			2015-07-25	6	3	EX3	E4	9	-	Y	-	Y	-	-	-	-
2015-07-25	6	3	CONT3	F4	9	-	Y	-	Y	-	-	-	-			2015-07-25	6	3	EX3	F4	?	Y	-	-	UNDETERMINED	-	-	-	-
2015-07-25	6	3	CONT3	G4	MISSING	-	-	-	-	-	-	-	-			2015-07-25	6	3	EX3	G4	ZOEA	-	Y	Y	Y	Y	Y	Y	Y
2015-07-25	6	3	CONT3	H4	MISSING	-	-	-	-	-	-	-	-			2015-07-25	6	3	EX3	H4	9	-	Y	-	Y	-	-	-	-
2015-07-25	6	3	CONT3	A5	9	-	Y	-	Y	-	-	-	-			2015-07-25	6	3	EX3	A5	9	-	Y	-	Y	-	-	-	-
2015-07-25	6	3	CONT3	B5	9	-	Y	-	Y	-	-	-	-			2015-07-25	6	3	EX3	B5	9	-	Y	-	Y	-	-	-	-
2015-07-25	6	3	CONT3	C5	9	-	Y	-	Y	-	-	-	-			2015-07-25	6	3	EX3	C5	9	-	Y	-	Y	-	-	-	-
2015-07-25	6	3	CONT3	D5	?	-	-	-	UNDETERMINED	-	-	-	-			2015-07-25	6	3	EX3	D5	9	-	Y	-	Y	-	-	-	-
2015-07-25	6	3	CONT3	E5	9	-	Y	-	Y	-	-	-	-			2015-07-25	6	3	EX3	E5	9	-	Y	-	Y	-	-	-	-
2015-07-25	6	3	CONT3	F5	9	-	Y	-	Y	-	-	-	-			2015-07-25	6	3	EX3	F5	9	-	Y	-	Y	-	-	-	-
2015-07-25	6	3	CONT3	G5	9	-	Y	-	Y	-	-	-	-			2015-07-25	6	3	EX3	G5	9	-	Y	-	Y	-	-	-	-
2015-07-25	6	3	CONT3	H5	9	-	Y	-	Y	-	-	-	-			2015-07-25	6	3	EX3	H5	9	-	Y	-	Y	-	-	-	-
2015-07-25	6	3	CONT3	A6	9	-	Y	-	Y	-	-	-	-			2015-07-25	6	3	EX3	A6	?	Y	-	-	UNDETERMINED	-	-	-	-
2015-07-25	6	3	CONT3	B6	9	-	Y	-	Y	-	-	-	-			2015-07-25	6	3	EX3	B6	9	-	Y	-	Y	-	-	-	-
2015-07-25	6	3	CONT3	C6	?	Y	-	-	UNDETERMINED	-	-	-	-			2015-07-25	6	3	EX3	C6	9	-	Y	-	Y	-	-	-	-
2015-07-25	6	3	CONT3	D6	?	Y	-	-	UNDETERMINED	-	-	-	-			2015-07-25	6	3	EX3	D6	?	Y	-	-	UNDETERMINED	-	-	-	-
2015-07-25	6	3	CONT3	E6	9	-	Y	-	Y	-	-	-	-			2015-07-25	6	3	EX3	E6	9	-	Y	-	Y	-	-	-	-
2015-07-25	6	3	CONT3	F6	9	-	Y	-	Y	-	-	-	-			2015-07-25	6	3	EX3	F6	9	-	Y	-	Y	-	-	-	-
2015-07-25	6	3	CONT3	G6	9	-	Y	-	Y	-	-	-	-			2015-07-25	6	3	EX3	G6	9	-	Y	-	Y	-	-	-	-
2015-07-26	6	3	CONT3	H6	9	-	Y	-	Y	-	-	-	-			2015-07-25	6	3	EX3	H6	9	-	Y	-	Y	-	-	-	-
2015-07-26	6	4	CONT4	A1	9	Y	-	-	BROKEN UP	-	-	-	-			2015-07-26	6	4	EX4	A1	?	Y	-	-	UNDETERMINED	-	-	-	-
2015-07-26	6	4	CONT4	B1	9	Y	-	-	Y	-	-	-	-			2015-07-26	6	4	EX4	B1	9	Y	-	-	BROKEN UP	-	-	-	-
2015-07-26	6	4	CONT4	C1	9	Y	-	-	BROKEN UP	-	-	-	-			2015-07-26	6	4	EX4	C1	PREZOEA	-	Y	N	Y	N	Y	IMPAIRED	N
2015-07-26	6	4	CONT4	D1	9	Y	-	-	BROKEN UP	-	-	-	-			2015-07-26	6	4	EX4	D1	9	Y	-	-	BROKEN UP	-	-	-	-
2015-07-26	6	4	CONT4	E1	PREZOEA	-	Y	SHORT	Y	N	Y	IMPAIRED	N			2015-07-26	6	4	EX4	E1	PREZOEA	-	Y	N	Y	N	Y	IMPAIRED	Y SOFT AND BENT
2015-07-26	6	4	CONT4	F1	PREZOEA	-	Y	N	Y	N	Y	IMPAIRED	N			2015-07-26	6	4	EX4	F1	PREZOEA	Y	N	Y	N	Y	N	IMPAIRED	N
2015-07-26	6	4	CONT4	G1	9	-	Y	-	BROKEN UP	-	-	-	-			2015-07-26	6	4	EX4	G1	ZOEA	-	Y	Y	Y	Y	Y	Y	Y
2015-07-26	6	4	CONT4	H1	?	Y	Y	-	UNDETERMINED	-	-	-	-			2015-07-26	6	4	EX4	H1	?	Y	-	-	UNDETERMINED	-	-	-	-
2015-07-26	6	4	CONT4	A2	9	-	Y	-	Y	-	-	-	-			2015-07-26	6	4	EX4	A2	9	Y	-	-	BROKEN UP	-	-	-	-
2015-07-26	6	4	CONT4	B2	?	Y	-	-	UNDETERMINED	-	-	-	-			2015-07-26	6	4	EX4	B2	ZOEA	-	Y	Y	Y	Y	Y	Y	Y
2015-07-26	6	4	CONT4	C2	6	Y	-	-	BROKEN UP	-	-	-	-			2015-07-26	6	4	EX4	C2	PREZOEA	-	Y	N	Y	N	Y	IMPAIRED	N
2015-07-26	6	4	CONT4	D2	ZOEA	-	Y	Y	Y	Y	Y	Y	Y			2015-07-26	6	4	EX4	D2	ZOEA	-	Y	Y	Y	Y	Y	Y	Y
2015-07-26	6	4	CONT4	E2	?	Y	-	-	UNDETERMINED	-	-	-	-			2015-07-26	6	4	EX4	E2	PREZOEA	-	Y	N	Y	N	Y	IMPAIRED	N
2015-07-26	6	4	CONT4	F2	ZOEA	-	Y	Y	Y	Y	Y	Y	Y			2015-07-26	6	4	EX4	F2	PREZOEA	Y	N	N	BROKEN UP	N	Y	-	N
2015-07-26	6	4	CONT4	G2	ZOEA	-	Y	Y	Y	Y	Y	Y	Y			2015-07-26	6	4	EX4	G2	?	Y	-	-	UNDETERMINED	-	-	-	-
2015-07-26	6	4	CONT4	H2	ZOEA	-	Y	Y	Y	Y	Y	Y	Y			2015-07-26	6	4	EX4	H2	?	Y	-	-	UNDETERMINED	-	-	-	-
2015-07-26	6	4	CONT4	A3	ZOEA	-	Y	Y	Y	Y	Y	Y	Y			2015-07-26	6	4	EX4	A3	9	Y	-	-	BROKEN UP	-	-	-	-
2015-07-26	6	4	CONT4	B3	ZOEA	-	Y	Y	Y	Y	Y	Y	Y			2015-07-26	6	4	EX4	B3	9	Y	-	-	BROKEN UP	-	-	-	-
2015-07-26	6	4	CONT4	C3	ZOEA	-	Y	Y	Y	Y	Y	Y	Y			2015-07-26	6	4	EX4	C3	PREZOEA	Y	N	N	BROKEN UP	N	Y	-	N
2015-07-26	6	4	CONT4	D3	9	Y	-	-	BROKEN UP	-	-	-	-			2015-07-26	6	4	EX4	D3	?	Y	-	-	UNDETERMINED	-	-	-	-
2015-07-26	6	4	CONT4	E3	?	Y	-	-	UNDETERMINED	-	-	-	-			2015-07-26	6	4	EX4	E3	ZOEA	-	Y	Y	Y	Y	Y	Y	Y
2015-07-26	6	4	CONT4	F3	ZOEA	-	Y	Y	Y	Y	Y	Y	Y			2015-07-26	6	4	EX4	F3	ZOEA	-	Y	Y	Y	Y	Y	Y	Y
2015-07-26	6	4	CONT4	G3	?	Y	-	-	UNDETERMINED	-	-	-	-			2015-07-26	6	4	EX4	G3	MISSING	-	-	-	-	-	-	-	-
2015-07-26	6	4	CONT4	H3	?	Y	-	-	UNDETERMINED	-	-	-	-			2015-07-26	6	4	EX4	H3	MISSING	-	-	-	-	-	-	-	-
2015-07-26	6	4	CONT4	A4	?	Y	-	-	UNDETERMINED	-	-	-	-			2015-07-26	6	4	EX4	A4	?	Y	-	-	UNDETERMINED	-	-	-	-
2015-07-26	6	4	CONT4	B4	?	Y	-	-	UNDETERMINED	-	-	-	-			2015-07-26	6	4	EX4	B4	PREZOEA	-	Y	N	Y	N	Y	IMPAIRED	N
2015-07-26	6	4	CONT4	C4	?	Y	-	-	UNDETERMINED	-	-	-	-			2015-07-26	6	4	EX4	C4	PREZOEA	-	Y	N	Y	N	Y	IMPAIRED	N
2015-07-26	6	4	CONT4	D4	9	Y	-	-	VERY LARGE BROKEN UP	-	-	-	-			2015-07-26	6	4	EX4	D4	PREZOEA	Y	N	N	Y	N	Y	-	N
2015-07-26	6	4	CONT4	E4	ZOEA	-	Y	Y	Y	Y	Y	Y	Y			2015-07-26	6	4	EX4	E4	MISSING	-	-	-	-	-	-	-	-
2015-07-26	6	4	CONT4	F4	9	Y	-	-	BROKEN UP	-	-	-	-			2015-07-26	6	4	EX4	F4	9	Y	-	-	BROKEN UP	-	-	-	-
2015-07-26	6	4	CONT4	G4	9	Y	-	-	BROKEN UP	-	-	-	-			2015-07-26	6	4	EX4	G4	?	Y	-	-	UNDETERMINED	-	-	-	-
2015-07-26	6	4	CONT4	H4	9	Y	-	-	BROKEN UP	-	-	-	-			2015-07-26	6	4	EX4	H4	?	Y	-	-	UNDETERMINED	-	-	-	-
2015-07-26	6	4	CONT4	A5	ZOEA	-	Y	Y	Y	Y	Y	Y	Y			2015-07-26	6	4	EX4	A5	PREZOEA	-	Y	N	Y	N	Y	IMPAIRED	N
2015-07-26	6	4	CONT4	B5	ZOEA	-	Y	Y	Y	Y	Y	Y	Y			2015-07-26	6	4	EX4	B5	?	Y	-	-	UNDETERMINED	-	-	-	-
2015-07-26	6	4	CONT4	C5	ZOEA	-	Y	Y	Y	Y	Y	Y	Y			2015-07-26	6	4	EX4	C5	9	Y	-	-	BROKEN UP	-	-	-	-
2015-07-26	6	4	CONT4	D5	?	Y	-	-	UNDETERMINED	-	-	-	-			2015-07-26	6	4	EX4	D5	ZOEA	-	Y	Y	Y	Y	Y	Y	Y
2015-07-26	6	4	CONT4	E5	?	Y	-	-	UNDETERMINED	-	-	-	-			2015-07-26	6	4	EX4	E5	PREZOEA	-	Y	N	Y	N	Y	IMPAIRED	N
2015-07-26	6	4	CONT4	F5	ZOEA	-	Y	Y	Y	Y	Y	Y	Y			2015-07-26	6	4	EX4	F5	PREZOEA	Y	N	N	BROKEN UP	N	Y	-	N
2015-07-26	6	4	CONT4	G5	ZOEA	-	Y	Y	Y	Y	Y	Y	Y			2015-07-26	6	4	EX4	G5	ZOEA	-	Y	Y	Y	Y	Y	Y	Y
2015-07-26	6	4	CONT4	H5	?	Y	-	-	UNDETERMINED	-	-	-	-			2015-07-26	6	4	EX4	H5	?	Y	-	-	UNDETERMINED	-	-	-	-
2015-07-26	6	4	CONT4	A6	?	Y	-	-	UNDETERMINED	-	-	-	-			2015-07-26	6	4	EX4	A6	9	Y	-	-	BROKEN UP	-	-	-	-
2015-07-26	6	4	CONT4	B6	ZOEA	-	Y	Y	Y	Y	Y	Y	Y			2015-07-26	6	4	EX4	B6	9	Y	-	-	BROKEN UP	-	-	-	-
2015-07-26	6	4	CONT4	C6	ZOEA	-	Y	Y	Y	Y	Y	Y	Y			2015-07-26	6	4	EX4	C6	9	Y	-	-	BROKEN UP	-	-	-	-
2015-07-26	6	4	CONT4	D6	PREZOEA	-	Y	N	Y	N	Y	IMPAIRED	N			2015-07-26	6	4	EX4	D6	PREZOEA	-	Y	N	Y	N	Y	IMPAIRED	N
2015-07-26	6	4	CONT4	E6	?	Y	-	-	UNDETERMINED	-	-	-	-			2015-07-26	6	4	EX4	E6	ZOEA	-	Y	Y	Y	Y	Y	Y	Y
2015-07-26	6	4	CONT4	F6	?	Y	-	-	UNDETERMINED	-	-	-	-			2015-07-26	6	4	EX4	F6	PREZOEA	Y	N	N	BROKEN UP	N	Y	-	N
2015-07-26	6	4	CONT4	G6	PREZOEA	-	Y	N	Y	N	Y	IMPAIRED	N			2015-07-26	6	4	EX4	G6	ZOEA	-	Y	Y	Y	Y	Y	Y	Y
2015-07-27	6	4	CONT4	H6	?	Y	-	-	UNDETERMINED	-	-	-	-			2015-07-26	6	4	EX4	H6	9	Y	-	-	BROKEN UP	-	-	-	-
2015-07-27	6	5	CONT5	A1	ZOEA	-	Y	Y	Y	Y	Y	Y	Y			2015-07-27	6	5	EX5	A1	ZOEA	-	Y	Y	Y	Y	Y	Y	Y
2015-07-27	6	5	CONT5	B1	?	Y	-	-	UNDETERMINED	-	-	-	-			2015-07-27	6	5	EX5	B1	?	Y	-	-	UNDETERMINED	-	-	-	-
2015-07-27	6	5	CONT5	C1	MISSING	-	-	-	-	-	-	-	-			2015-07-27	6	5	EX5	C1	?	Y	-	-	UNDETERMINED	-	-	-	-
2015-07-27	6	5	CONT5	D1	ZOEA	-	Y	Y	Y	Y	Y	Y	Y			2015-07-27	6	5	EX5	D1	ZOEA	-	Y	Y	Y	Y	Y	Y	Y
2015-07-27	6	5	CONT5	E1	ZOEA	-	Y	Y	Y	Y	Y	Y	Y			2015-07-27	6	5	EX5	E1	9	Y	-	-	BROKEN UP	-	-	-	-
2015-07-27	6	5	CONT5	F1	ZOEA	-	Y	Y	Y	Y	Y	Y	Y			2015-07-27	6	5	EX5	F1	PREZOEA	-	Y	N	Y	N	Y	I	Y
2015-07-27	6	5	CONT5	G1	ZOEA	-	-	Y	Y	Y	Y	-	Y			2015-07-27	6	5	EX5	G1	PREZOEA	-	N	N	Y	N	Y	-	N
2015-07-27	6	5	CONT5	H1	ZOEA	-	Y	Y	Y	Y	Y	Y	Y			2015-07-27	6	5	EX5	H1	8	Y	-	-	-	-	-	-	-
2015-07-27	6	5	CONT5	A2	ZOEA	-	Y	Y	Y	Y	Y	Y	Y			2015-07-27	6	5	EX5	A2	ZOEA	-	Y	Y	Y	Y	Y	Y	Y
2015-07-27	6	5	CONT5	B2	ZOEA	-	Y	Y	Y	Y	Y	Y	Y			2015-07-27	6	5	EX5	B2	PREZOEA	-	Y	N	Y	N	Y	IMPAIRED	N
2015-07-27	6	5	CONT5	C2	ZOEA	-	Y	Y	Y	Y	Y	Y	Y			2015-07-27	6	5	EX5	C2	PREZOEA	-	Y	N	Y	N	Y	IMPAIRED	N
2015-07-27	6	5	CONT5	D2	ZOEA	-	Y	Y	Y	Y	Y	Y	Y			2015-07-27	6	5	EX5	D2	?	Y	-	-	UNDETERMINED	-	-	-	-
2015-07-27	6	5	CONT5	E2	6	Y	-	-	BROKEN UP	-	-	-	-			2015-07-27	6	5	EX5	E2	?	Y	-	-	UNDETERMINED	-	-	-	-
2015-07-27	6	5	CONT5	F2	ZOEA	-	Y	Y	Y	Y	Y	Y	Y			2015-07-27	6	5	EX5	F2	ZOEA	-	Y	Y	Y	Y	Y	Y	Y
2015-07-27	6	5	CONT5	G2	MISSING	-	-	-	-	-	-	-	-			2015-07-27	6	5	EX5	G2	PREZOEA	-	Y	N	Y	N	Y	IMPAIRED	N
2015-07-27	6	5	CONT5	H2	ZOEA	-	Y	Y	Y	Y	Y	Y	Y			2015-07-27	6	5	EX5	H2	PREZOEA	-	Y	N	Y	N	Y	IMPAIRED	N
2015-07-27	6	5	CONT5	A3	ZOEA	-	Y	Y	Y	Y	Y	Y	Y			2015-07-27	6	5	EX5	A3	PREZOEA	-	Y	N	Y	N	Y	IMPAIRED	N
2015-07-27	6	5	CONT5	B3	ZOEA	-	Y	Y	Y	Y	Y	Y	Y			2015-07-27	6	5	EX5	B3	PREZOEA	-	Y	N	Y	N	Y	IMPAIRED	N
2015-07-27	6	5	CONT5	C3	9	Y	-	-	BROKEN UP	-	-	-	-			2015-07-27	6	5	EX5	C3	?	Y	-	-	UNDETERMINED	-	-	-	-
2015-07-27	6	5	CONT5	D3	ZOEA	-	Y	Y	Y	Y	Y	Y	Y			2015-07-27	6	5	EX5	D3	PREZOEA	-	Y	N	Y	N	Y	IMPAIRED	N
2015-07-27	6	5	CONT5	E3	ZOEA	-	Y	Y	Y	Y	Y	Y	Y			2015-07-27	6	5	EX5	E3	?	Y	-	-	UNDETERMINED	-	-	-	-
2015-07-27	6	5	CONT5	F3	ZOEA	-	Y	Y	Y	Y	Y	Y	Y			2015-07-27	6	5	EX5	F3	ZOEA	-	Y	Y	Y	Y	Y	Y	Y
2015-07-27	6	5	CONT5	G3	ZOEA	-	Y	Y	Y	Y	Y	Y	Y			2015-07-27	6	5	EX5	G3	9	Y	-	-	BROKEN UP	-	-	-	-
2015-07-27	6	5	CONT5	H3	MISSING	-	-	-	-	-	-	-	-			2015-07-27	6	5	EX5	H3	PREZOEA	-	Y	N	Y	N	Y	IMPAIRED	N
2015-07-27	6	5	CONT5	A4	ZOEA	-	Y	Y	Y	Y	Y	Y	Y			2015-07-27	6	5	EX5	A4	PREZOEA	-	Y	N	Y	N	Y	IMPAIRED	N
2015-07-27	6	5	CONT5	B4	ZOEA	-	Y	Y	Y	Y	Y	Y	Y			2015-07-27	6	5	EX5	B4	PREZOEA	-	N	Y	BROKEN UP	N	Y	-	N
2015-07-27	6	5	CONT5	C4	ZOEA	-	Y	Y	Y	Y	Y	Y	Y			2015-07-27	6	5	EX5	C4	ZOEA	-	Y	Y	Y	Y	Y	Y	Y
2015-07-27	6	5	CONT5	D4	9	Y	-	-	BROKEN UP	-	-	-	-			2015-07-27	6	5	EX5	D4	9	Y	-	-	BROKEN UP	-	-	-	-
2015-07-27	6	5	CONT5	E4	ZOEA	-	Y	Y	Y	Y	Y	Y	Y			2015-07-27	6	5	EX5	E4	?	Y	-	-	UNDETERMINED	-	-	-	-
2015-07-27	6	5	CONT5	F4	ZOEA	-	Y	Y	Y	Y	Y	Y	Y			2015-07-27	6	5	EX5	F4	PREZOEA	-	Y	N	Y	N	Y	IMPAIRED	N
2015-07-27	6	5	CONT5	G4	ZOEA	-	Y	Y	Y	Y	Y	Y	Y			2015-07-27	6	5	EX5	G4	ZOEA	-	Y	Y	Y	Y	Y	Y	Y
2015-07-27	6	5	CONT5	H4	ZOEA	-	Y	Y	Y	Y	Y	Y	Y			2015-07-27	6	5	EX5	H4	?	Y	-	-	UNDETERMINED	-	-	-	-
2015-07-27	6	5	CONT5	A5	ZOEA	-	Y	Y	Y	Y	Y	Y	Y			2015-07-27	6	5	EX5	A5	?	Y	-	-	UNDETERMINED	-	-	-	-
2015-07-27	6	5	CONT5	B5	?	Y	-	-	UNDETERMINED	-	-	-	-			2015-07-27	6	5	EX5	B5	PREZOEA	-	Y	N	Y	N	Y	IMPAIRED	N
2015-07-27	6	5	CONT5	C5	ZOEA	-	Y	-	-	-	-	-	-			2015-07-27	6	5	EX5	C5	PREZOEA	-	Y	N	Y	N	Y	IMPAIRED	N
2015-07-27	6	5	CONT5	D5	?	Y	-	-	UNDETERMINED	-	-	-	-			2015-07-27	6	5	EX5	D5	ZOEA	-	Y	Y	Y	Y	Y	Y	Y
2015-07-27	6	5	CONT5	E5	?	Y	-	-	UNDETERMINED	-	-	-	-			2015-07-27	6	5	EX5	E5	PREZOEA	-	Y	N	Y	N	Y	IMPAIRED	N
2015-07-27	6	5	CONT5	F5	?	Y	-	-	UNDETERMINED	-	-	-	-			2015-07-27	6	5	EX5	F5	?	Y	-	-	UNDETERMINED	-	-	-	-
2015-07-27	6	5	CONT5	G5	ZOEA	-	Y	Y	Y	Y	Y	Y	Y			2015-07-27	6	5	EX5	G5	PREZOEA	-	Y	N	Y	N	Y	IMPAIRED	N
2015-07-27	6	5	CONT5	H5	ZOEA	-	Y	Y	Y	Y	Y	Y	Y			2015-07-27	6	5	EX5	H5	?	Y	-	-	UNDETERMINED	-	-	-	-
2015-07-27	6	5	CONT5	A6	ZOEA	-	Y	Y	Y	Y	Y	Y	Y			2015-07-27	6	5	EX5	A6	?	Y	-	-	UNDETERMINED	-	-	-	-
2015-07-27	6	5	CONT5	B6	MISSING	-	-	-	-	-	-	-	-			2015-07-27	6	5	EX5	B6	PREZOEA	-	Y	N	Y	N	Y	IMPAIRED	N
2015-07-27	6	5	CONT5	C6	9	Y	-	-	BROKEN UP	-	-	-	-			2015-07-27	6	5	EX5	C6	?	Y	-	-	UNDETERMINED	-	-	-	-
2015-07-27	6	5	CONT5	D6	ZOEA	-	Y	Y	Y	Y	Y	Y	Y			2015-07-27	6	5	EX5	D6	?	Y	-	-	UNDETERMINED	-	-	-	-
2015-07-27	6	5	CONT5	E6	ZOEA	-	Y	Y	Y	Y	Y	Y	Y			2015-07-27	6	5	EX5	E6	?	Y	-	-	UNDETERMINED	-	-	-	-
2015-07-27	6	5	CONT5	F6	ZOEA	-	Y	Y	Y	Y	Y	Y	Y			2015-07-27	6	5	EX5	F6	PREZOEA	-	Y	N	Y	N	Y	IMPAIRED	N
2015-07-27	6	5	CONT5	G6	ZOEA	-	Y	Y	Y	Y	Y	Y	Y			2015-07-27	6	5	EX5	G6	ZOEA	-	Y	Y	Y	Y	Y	Y	Y
2015-07-27	6	5	CONT5	H6	ZOEA	-	Y	Y	Y	Y	Y	Y	Y			2015-07-27	6	5	EX5	H6	PREZOEA	-	Y	N	Y	N	Y	IMPAIRED	N

## Sheet: Replicate 7
Date	Replicate #	Day	Plate ID	Well ID	Stage	Cloudy/Dark	Heart beat	Dorsal Spine	Eyes (Full & Bilaterally symmetrical)	Rostrum	Telson	Swimming ablility	Lateral Spines			Date	Replicate #	Day	Plate ID	Well ID	Stage	Cloudy/Dark	Heart beat	Dorsal Spine	Eyes (Full & Bilaterally symmetrical)	Rostrum	Telson	Swimming ablility	Lateral Spines
2015-07-24	7	1	CONT1	A1	3	-	-	-	NOT PRESENT	-	-	-	-			2015-07-24	7	1	EX1	A1	3	-	-	-	NOT PRESENT	-	-	-	-
2015-07-24	7	1	CONT1	B1	3	-	-	-	NOT PRESENT	-	-	-	-			2015-07-24	7	1	EX1	B1	3	-	-	-	NOT PRESENT	-	-	-	-
2015-07-24	7	1	CONT1	C1	2	-	-	-	NOT PRESENT	-	-	-	-			2015-07-24	7	1	EX1	C1	3	-	-	-	NOT PRESENT	-	-	-	-
2015-07-24	7	1	CONT1	D1	4	-	-	-	NOT PRESENT	-	-	-	-			2015-07-24	7	1	EX1	D1	4	-	-	-	NOT PRESENT	-	-	-	-
2015-07-24	7	1	CONT1	E1	4	-	-	-	NOT PRESENT	-	-	-	-			2015-07-24	7	1	EX1	E1	3	-	-	-	NOT PRESENT	-	-	-	-
2015-07-24	7	1	CONT1	F1	4	-	-	-	NOT PRESENT	-	-	-	-			2015-07-24	7	1	EX1	F1	3	-	-	-	NOT PRESENT	-	-	-	-
2015-07-24	7	1	CONT1	G1	2	Y	-	-	NOT PRESENT	-	-	-	-			2015-07-24	7	1	EX1	G1	4	-	-	-	NOT PRESENT	-	-	-	-
2015-07-24	7	1	CONT1	H1	2	Y	-	-	NOT PRESENT	-	-	-	-			2015-07-24	7	1	EX1	H1	3	-	-	-	NOT PRESENT	-	-	-	-
2015-07-24	7	1	CONT1	A2	2	Y	-	-	NOT PRESENT	-	-	-	-			2015-07-24	7	1	EX1	A2	3	-	-	-	NOT PRESENT	-	-	-	-
2015-07-24	7	1	CONT1	B2	4	-	-	-	NOT PRESENT	-	-	-	-			2015-07-24	7	1	EX1	B2	4	-	-	-	NOT PRESENT	-	-	-	-
2015-07-24	7	1	CONT1	C2	3	-	-	-	NOT PRESENT	-	-	-	-			2015-07-24	7	1	EX1	C2	4	-	-	-	NOT PRESENT	-	-	-	-
2015-07-24	7	1	CONT1	D2	3	-	-	-	NOT PRESENT	-	-	-	-			2015-07-24	7	1	EX1	D2	3	-	-	-	NOT PRESENT	-	-	-	-
2015-07-24	7	1	CONT1	E2	2	Y	-	-	NOT PRESENT	-	-	-	-			2015-07-24	7	1	EX1	E2	2	Y	-	-	NOT PRESENT	-	-	-	-
2015-07-24	7	1	CONT1	F2	2	Y	-	-	NOT PRESENT	-	-	-	-			2015-07-24	7	1	EX1	F2	3	-	-	-	NOT PRESENT	-	-	-	-
2015-07-24	7	1	CONT1	G2	4	-	-	-	NOT PRESENT	-	-	-	-			2015-07-24	7	1	EX1	G2	3	-	-	-	NOT PRESENT	-	-	-
2015-07-24	7	1	CONT1	H2	MISSING	-	-	-	-	-	-	-	-			2015-07-24	7	1	EX1	H2	3	-	-	-	NOT PRESENT	-	-	-	-
2015-07-24	7	1	CONT1	A3	4	-	-	-	NOT PRESENT	-	-	-	-			2015-07-24	7	1	EX1	A3	3	-	-	-	NOT PRESENT	-	-	-	-
2015-07-24	7	1	CONT1	B3	3	-	-	-	NOT PRESENT	-	-	-	-			2015-07-24	7	1	EX1	B3	4	-	-	-	NOT PRESENT	-	-	-	-
2015-07-24	7	1	CONT1	C3	2	Y	-	-	NOT PRESENT	-	-	-	-			2015-07-24	7	1	EX1	C3	3	-	-	-	NOT PRESENT	-	-	-	-
2015-07-24	7	1	CONT1	D3	2	Y	-	-	NOT PRESENT	-	-	-	-			2015-07-24	7	1	EX1	D3	2	Y	-	-	NOT PRESENT	-	-	-	-
2015-07-24	7	1	CONT1	E3	3	Y	-	-	NOT PRESENT	-	-	-	-			2015-07-24	7	1	EX1	E3	3	-	-	-	NOT PRESENT	-	-	-	-
2015-07-24	7	1	CONT1	F3	2	Y	-	-	NOT PRESENT	-	-	-	-			2015-07-24	7	1	EX1	F3	2	Y	-	-	NOT PRESENT	-	-	-	-
2015-07-24	7	1	CONT1	G3	2	Y	-	-	NOT PRESENT	-	-	-	-			2015-07-24	7	1	EX1	G3	2	Y	-	-	NOT PRESENT	-	-	-	-
2015-07-24	7	1	CONT1	H3	3	-	-	-	NOT PRESENT	-	-	-	-			2015-07-24	7	1	EX1	H3	2	Y	-	-	NOT PRESENT	-	-	-	-
2015-07-24	7	1	CONT1	A4	3	-	-	-	NOT PRESENT	-	-	-	-			2015-07-24	7	1	EX1	A4	3	-	-	-	NOT PRESENT	-	-	-	-
2015-07-24	7	1	CONT1	B4	2	Y	-	-	NOT PRESENT	-	-	-	-			2015-07-24	7	1	EX1	B4	2	Y	-	-	NOT PRESENT	-	-	-	-
2015-07-24	7	1	CONT1	C4	2	Y	-	-	NOT PRESENT	-	-	-	-			2015-07-24	7	1	EX1	C4	2	Y	-	-	NOT PRESENT	-	-	-	-
2015-07-24	7	1	CONT1	D4	3	-	-	-	NOT PRESENT	-	-	-	-			2015-07-24	7	1	EX1	D4	4	-	-	-	NOT PRESENT	-	-	-	-
2015-07-24	7	1	CONT1	E4	3	-	-	-	NOT PRESENT	-	-	-	-			2015-07-24	7	1	EX1	E4	4	-	-	-	NOT PRESENT	-	-	-	-
2015-07-24	7	1	CONT1	F4	2	Y	-	-	NOT PRESENT	-	-	-	-			2015-07-24	7	1	EX1	F4	2	Y	-	-	NOT PRESENT	-	-	-	-
2015-07-24	7	1	CONT1	G4	3	-	-	-	NOT PRESENT	-	-	-	-			2015-07-24	7	1	EX1	G4	2	Y	-	-	NOT PRESENT	-	-	-	-
2015-07-24	7	1	CONT1	H4	2	Y	-	-	NOT PRESENT	-	-	-	-			2015-07-24	7	1	EX1	H4	2	Y	-	-	NOT PRESENT	-	-	-	-
2015-07-24	7	1	CONT1	A5	4	-	-	-	NOT PRESENT	-	-	-	-			2015-07-24	7	1	EX1	A5	5	-	-	-	NOT PRESENT	-	-	-	-
2015-07-24	7	1	CONT1	B5	3	-	-	-	NOT PRESENT	-	-	-	-			2015-07-24	7	1	EX1	B5	2	Y	-	-	NOT PRESENT	-	-	-	-
2015-07-24	7	1	CONT1	C5	3	Y	-	-	NOT PRESENT	-	-	-	-			2015-07-24	7	1	EX1	C5	3	-	-	-	NOT PRESENT	-	-	-	-
2015-07-24	7	1	CONT1	D5	2	Y	-	-	NOT PRESENT	-	-	-	-			2015-07-24	7	1	EX1	D5	2	Y	-	-	NOT PRESENT	-	-	-	-
2015-07-24	7	1	CONT1	E5	4	-	-	-	NOT PRESENT	-	-	-	-			2015-07-24	7	1	EX1	E5	3	-	-	-	NOT PRESENT	-	-	-	-
2015-07-24	7	1	CONT1	F5	3	-	-	-	NOT PRESENT	-	-	-	-			2015-07-24	7	1	EX1	F5	3	-	-	-	NOT PRESENT	-	-	-	-
2015-07-24	7	1	CONT1	G5	2	Y	-	-	NOT PRESENT	-	-	-	-			2015-07-24	7	1	EX1	G5	4	-	-	-	NOT PRESENT	-	-	-	-
2015-07-24	7	1	CONT1	H5	3	-	-	-	NOT PRESENT	-	-	-	-			2015-07-24	7	1	EX1	H5	3	-	-	-	NOT PRESENT	-	-	-	-
2015-07-24	7	1	CONT1	A6	3	-	-	-	NOT PRESENT	-	-	-	-			2015-07-24	7	1	EX1	A6	4	-	-	-	NOT PRESENT	-	-	-	-
2015-07-24	7	1	CONT1	B6	3	-	-	-	NOT PRESENT	-	-	-	-			2015-07-24	7	1	EX1	B6	3	-	-	-	NOT PRESENT	-	-	-	-
2015-07-24	7	1	CONT1	C6	2	Y	-	-	NOT PRESENT	-	-	-	-			2015-07-24	7	1	EX1	C6	2	Y	-	-	NOT PRESENT	-	-	-	-
2015-07-24	7	1	CONT1	D6	2	Y	-	-	NOT PRESENT	-	-	-	-			2015-07-24	7	1	EX1	D6	2	Y	-	-	NOT PRESENT	-	-	-	-
2015-07-24	7	1	CONT1	E6	3	-	-	-	NOT PRESENT	-	-	-	-			2015-07-24	7	1	EX1	E6	2	Y	-	-	NOT PRESENT	-	-	-	-
2015-07-24	7	1	CONT1	F6	3	-	-	-	NOT PRESENT	-	-	-	-			2015-07-24	7	1	EX1	F6	4	-	-	-	NOT PRESENT	-	-	-	-
2015-07-24	7	1	CONT1	G6	2	Y	-	-	NOT PRESENT	-	-	-	-			2015-07-24	7	1	EX1	G6	2	Y	-	-	NOT PRESENT	-	-	-	-
2015-07-25	7	1	CONT1	H6	4	-	-	-	NOT PRESENT	-	-	-	-			2015-07-24	7	1	EX1	H6	3	-	-	-	NOT PRESENT	-	-	-	-
2015-07-25	7	2	CONT2	A1	6	-	-	-	Y	-	-	-	-			2015-07-25	7	2	EX2	A1	?	Y	-	-	UNDETERMINED	-	-	-	-
2015-07-25	7	2	CONT2	B1	?	Y	-	-	UNDETERMINED	-	-	-	-			2015-07-25	7	2	EX2	B1	?	Y	-	-	UNDETERMINED	-	-	-	-
2015-07-25	7	2	CONT2	C1	6	-	-	-	Y	-	-	-	-			2015-07-25	7	2	EX2	C1	?	Y	-	-	UNDETERMINED	-	-	-	-
2015-07-25	7	2	CONT2	D1	?	Y	-	-	UNDETERMINED	-	-	-	-			2015-07-25	7	2	EX2	D1	?	Y	-	-	UNDETERMINED	-	-	-	-
2015-07-25	7	2	CONT2	E1	?	Y	-	-	UNDETERMINED	-	-	-	-			2015-07-25	7	2	EX2	E1	?	Y	-	-	UNDETERMINED	-	-	-	-
2015-07-25	7	2	CONT2	F1	6	-	-	-	Y	-	-	-	-			2015-07-25	7	2	EX2	F1	MISSING	-	-	-	-	-	-	-	-
2015-07-25	7	2	CONT2	G1	?	Y	-	-	UNDETERMINED	-	-	-	-			2015-07-25	7	2	EX2	G1	?	Y	-	-	UNDETERMINED	-	-	-	-
2015-07-25	7	2	CONT2	H1	6	-	-	-	Y	-	-	-	-			2015-07-25	7	2	EX2	H1	MISSING	-	-	-	-	-	-	-	-
2015-07-25	7	2	CONT2	A2	?	Y	-	-	UNDETERMINED	-	-	-	-			2015-07-25	7	2	EX2	A2	?	Y	-	-	UNDETERMINED	-	-	-	-
2015-07-25	7	2	CONT2	B2	?	Y	-	-	UNDETERMINED	-	-	-	-			2015-07-25	7	2	EX2	B2	?	Y	-	-	UNDETERMINED	-	-	-	-
2015-07-25	7	2	CONT2	C2	?	Y	-	-	UNDETERMINED	-	-	-	-			2015-07-25	7	2	EX2	C2	5	-	-	-	NOT PRESENT	-	-	-	-
2015-07-25	7	2	CONT2	D2	6	-	-	-	Y	-	-	-	-			2015-07-25	7	2	EX2	D2	5	-	-	-	NOT PRESENT	-	-	-	-
2015-07-25	7	2	CONT2	E2	?	Y	-	-	UNDETERMINED	-	-	-	-			2015-07-25	7	2	EX2	E2	?	Y	-	-	UNDETERMINED	-	-	-	-
2015-07-25	7	2	CONT2	F2	?	Y	-	-	UNDETERMINED	-	-	-	-			2015-07-25	7	2	EX2	F2	?	Y	-	-	UNDETERMINED	-	-	-	-
2015-07-25	7	2	CONT2	G2	?	Y	-	-	UNDETERMINED	-	-	-	-			2015-07-25	7	2	EX2	G2	5	-	-	-	NOT PRESENT	-	-	-	-
2015-07-25	7	2	CONT2	H2	?	Y	-	-	UNDETERMINED	-	-	-	-			2015-07-25	7	2	EX2	H2	?	Y	-	-	UNDETERMINED	-	-	-	-
2015-07-25	7	2	CONT2	A3	6	-	-	-	Y	-	-	-	-			2015-07-25	7	2	EX2	A3	?	Y	-	-	UNDETERMINED	-	-	-	-
2015-07-25	7	2	CONT2	B3	6	-	-	-	Y	-	-	-	-			2015-07-25	7	2	EX2	B3	?	Y	-	-	UNDETERMINED	-	-	-	-
2015-07-25	7	2	CONT2	C3	6	Y	-	-	BROKEN UP	-	-	-	-			2015-07-25	7	2	EX2	C3	6	-	-	-	Y	-	-	-	-
2015-07-25	7	2	CONT2	D3	6	-	-	-	Y	-	-	-	-			2015-07-25	7	2	EX2	D3	?	Y	-	-	UNDETERMINED	-	-	-	-
2015-07-25	7	2	CONT2	E3	?	Y	-	-	UNDETERMINED	-	-	-	-			2015-07-25	7	2	EX2	E3	?	Y	-	-	UNDETERMINED	-	-	-	-
2015-07-25	7	2	CONT2	F3	6	-	-	-	Y	-	-	-	-			2015-07-25	7	2	EX2	F3	5	-	-	-	NOT PRESENT	-	-	-	-
2015-07-25	7	2	CONT2	G3	6	-	-	-	Y	-	-	-	-			2015-07-25	7	2	EX2	G3	?	Y	-	-	UNDETERMINED	-	-	-	-
2015-07-25	7	2	CONT2	H3	?	Y	-	-	UNDETERMINED	-	-	-	-			2015-07-25	7	2	EX2	H3	?	Y	-	-	UNDETERMINED	-	-	-	-
2015-07-25	7	2	CONT2	A4	?	Y	-	-	UNDETERMINED	-	-	-	-			2015-07-25	7	2	EX2	A4	6	-	-	-	Y	-	-	-	-
2015-07-25	7	2	CONT2	B4	?	Y	-	-	UNDETERMINED	-	-	-	-			2015-07-25	7	2	EX2	B4	6	-	-	-	Y	-	-	-	-
2015-07-25	7	2	CONT2	C4	?	Y	-	-	UNDETERMINED	-	-	-	-			2015-07-25	7	2	EX2	C4	6	-	-	-	Y	-	-	-	-
2015-07-25	7	2	CONT2	D4	6	-	-	-	Y	-	-	-	-			2015-07-25	7	2	EX2	D4	?	Y	-	-	UNDETERMINED	-	-	-	-
2015-07-25	7	2	CONT2	E4	?	Y	-	-	UNDETERMINED	-	-	-	-			2015-07-25	7	2	EX2	E4	?	Y	-	-	UNDETERMINED	-	-	-	-
2015-07-25	7	2	CONT2	F4	6	-	-	-	Y	-	-	-	-			2015-07-25	7	2	EX2	F4	6	-	-	-	Y	-	-	-	-
2015-07-25	7	2	CONT2	G4	?	Y	-	-	UNDETERMINED	-	-	-	-			2015-07-25	7	2	EX2	G4	?	Y	-	-	UNDETERMINED	-	-	-	-
2015-07-25	7	2	CONT2	H4	?	Y	-	-	UNDETERMINED	-	-	-	-			2015-07-25	7	2	EX2	H4	5	-	-	-	NOT PRESENT	-	-	-	-
2015-07-25	7	2	CONT2	A5	6	-	-	-	Y	-	-	-	-			2015-07-25	7	2	EX2	A5	6	-	-	-	Y	-	-	-	-
2015-07-25	7	2	CONT2	B5	6	-	-	-	Y	-	-	-	-			2015-07-25	7	2	EX2	B5	5	-	-	-	NOT PRESENT	-	-	-	-
2015-07-25	7	2	CONT2	C5	?	Y	-	-	UNDETERMINED	-	-	-	-			2015-07-25	7	2	EX2	C5	?	Y	-	-	UNDETERMINED	-	-	-	-
2015-07-25	7	2	CONT2	D5	6	-	-	-	Y	-	-	-	-			2015-07-25	7	2	EX2	D5	6	-	-	-	Y	-	-	-	-
2015-07-25	7	2	CONT2	E5	6	-	-	-	Y	-	-	-	-			2015-07-25	7	2	EX2	E5	6	-	-	-	Y	-	-	-	-
2015-07-25	7	2	CONT2	F5	6	-	-	-	Y	-	-	-	-			2015-07-25	7	2	EX2	F5	7	-	-	-	Y	-	-	-	-
2015-07-25	7	2	CONT2	G5	?	Y	-	-	UNDETERMINED	-	-	-	-			2015-07-25	7	2	EX2	G5	5	-	-	-	NOT PRESENT	-	-	-	-
2015-07-25	7	2	CONT2	H5	?	Y	-	-	UNDETERMINED	-	-	-	-			2015-07-25	7	2	EX2	H5	?	Y	-	-	UNDETERMINED	-	-	-	-
2015-07-25	7	2	CONT2	A6	6	-	-	-	Y	-	-	-	-			2015-07-25	7	2	EX2	A6	?	Y	-	-	UNDETERMINED	-	-	-	-
2015-07-25	7	2	CONT2	B6	?	Y	-	-	UNDETERMINED	-	-	-	-			2015-07-25	7	2	EX2	B6	?	Y	-	-	UNDETERMINED	-	-	-	-
2015-07-25	7	2	CONT2	C6	5	-	-	-	NOT PRESENT	-	-	-	-			2015-07-25	7	2	EX2	C6	6	-	-	-	Y	-	-	-	-
2015-07-25	7	2	CONT2	D6	?	Y	-	-	UNDETERMINED	-	-	-	-			2015-07-25	7	2	EX2	D6	5	-	-	-	NOT PRESENT	-	-	-	-
2015-07-25	7	2	CONT2	E6	7	-	-	-	Y	-	-	-	-			2015-07-25	7	2	EX2	E6	9	-	Y	-	Y	-	-	-	-
2015-07-25	7	2	CONT2	F6	6	-	-	-	Y	-	-	-	-			2015-07-25	7	2	EX2	F6	6	-	-	-	Y	-	-	-	-
2015-07-25	7	2	CONT2	G6	6	-	-	-	Y	-	-	-	-			2015-07-25	7	2	EX2	G6	6	-	-	-	Y	-	-	-	-
2015-07-26	7	2	CONT2	H6	6	-	-	-	Y	-	-	-	-			2015-07-25	7	2	EX2	H6	?	Y	-	-	UNDETERMINED	-	-	-	-
2015-07-26	7	3	CONT3	A1	8	-	-	-	Y	-	-	-	-			2015-07-26	7	3	EX3	A1	?	Y	-	-	UNDETERMINED	-	-	-	-
2015-07-26	7	3	CONT3	B1	7	-	-	-	Y	-	-	-	-			2015-07-26	7	3	EX3	B1	?	Y	-	-	UNDETERMINED	-	-	-	-
2015-07-26	7	3	CONT3	C1	8	-	-	-	Y	-	-	-	-			2015-07-26	7	3	EX3	C1	?	Y	-	-	UNDETERMINED	-	-	-	-
2015-07-26	7	3	CONT3	D1	7	-	-	-	Y	-	-	-	-			2015-07-26	7	3	EX3	D1	8	-	-	-	Y	-	-	-	-
2015-07-26	7	3	CONT3	E1	?	Y	-	-	UNDETERMINED	-	-	-	-			2015-07-26	7	3	EX3	E1	7	-	-	-	Y	-	-	-	-
2015-07-26	7	3	CONT3	F1	?	Y	-	-	UNDETERMINED	-	-	-	-			2015-07-26	7	3	EX3	F1	7	Y-	-	-	Y	-	-	-	-
2015-07-26	7	3	CONT3	G1	7	-	-	-	Y	-	-	-	-			2015-07-26	7	3	EX3	G1	?	Y	-	-	UNDETERMINED	-	-	-	-
2015-07-26	7	3	CONT3	H1	?	Y	-	-	UNDETERMINED	-	-	-	-			2015-07-26	7	3	EX3	H1	7	-	-	-	-	-	-	-	-
2015-07-26	7	3	CONT3	A2	?	Y	-	-	UNDETERMINED	-	-	-	-			2015-07-26	7	3	EX3	A2	ZOEA	-	Y	Y	Y	Y	Y	Y	Y
2015-07-26	7	3	CONT3	B2	?	Y	-	-	UNDETERMINED	-	-	-	-			2015-07-26	7	3	EX3	B2	7	-	-	-	Y	-	-	-	-
2015-07-26	7	3	CONT3	C2	8	-	-	-	-	-	-	-	-			2015-07-26	7	3	EX3	C2	8	-	-	-	Y	-	-	-	-
2015-07-26	7	3	CONT3	D2	?	Y	-	-	UNDETERMINED	-	-	-	-			2015-07-26	7	3	EX3	D2	8	-	-	-	Y	-	-	-	-
2015-07-26	7	3	CONT3	E2	8	-	-	-	-	-	-	-	-			2015-07-26	7	3	EX3	E2	8	-	-	-	Y	-	-	-	-
2015-07-26	7	3	CONT3	F2	8	-	-	-	-	-	-	-	-			2015-07-26	7	3	EX3	F2	?	Y	-	-	UNDETERMINED	-	-	-	-
2015-07-26	7	3	CONT3	G2	8	-	-	-	-	-	-	-	-			2015-07-26	7	3	EX3	G2	6	-	-	-	Y	-	-	-	-
2015-07-26	7	3	CONT3	H2	?	Y	-	-	UNDETERMINED	-	-	-	-			2015-07-26	7	3	EX3	H2	?	Y	-	-	UNDETERMINED	-	-	-	-
2015-07-26	7	3	CONT3	A3	9	-	Y	-	Y	-	-	-	-			2015-07-26	7	3	EX3	A3	?	Y	-	-	UNDETERMINED	-	-	-	-
2015-07-26	7	3	CONT3	B3	7	-	-	-	Y	-	-	-	-			2015-07-26	7	3	EX3	B3	?	Y	-	-	UNDETERMINED	-	-	-	-
2015-07-26	7	3	CONT3	C3	8	-	-	-	Y	-	-	-	-			2015-07-26	7	3	EX3	C3	?	Y	-	-	UNDETERMINED	-	-	-	-
2015-07-26	7	3	CONT3	D3	?	Y	-	-	UNDETERMINED	-	-	-	-			2015-07-26	7	3	EX3	D3	?	Y	-	-	UNDETERMINED	-	-	-	-
2015-07-26	7	3	CONT3	E3	8	-	-	-	Y	-	-	-	-			2015-07-26	7	3	EX3	E3	7	-	-	-	Y	-	-	-	-
2015-07-26	7	3	CONT3	F3	9	-	Y	-	Y	-	-	-	-			2015-07-26	7	3	EX3	F3	?	Y	-	-	UNDETERMINED	-	-	-	-
2015-07-26	7	3	CONT3	G3	8	-	-	-	Y	-	-	-	-			2015-07-26	7	3	EX3	G3	?	Y	-	-	UNDETERMINED	-	-	-	-
2015-07-26	7	3	CONT3	H3	?	Y	-	-	UNDETERMINED	-	-	-	-			2015-07-26	7	3	EX3	H3	8	-	-	-	Y	-	-	-	-
2015-07-26	7	3	CONT3	A4	?	Y	-	-	UNDETERMINED	-	-	-	-			2015-07-26	7	3	EX3	A4	6	-	-	-	Y	-	-	-	-
2015-07-26	7	3	CONT3	B4	8	-	-	-	Y	-	-	-	-			2015-07-26	7	3	EX3	B4	8	-	-	-	Y	-	-	-	-
2015-07-26	7	3	CONT3	C4	?	Y	-	-	UNDETERMINED	-	-	-	-			2015-07-26	7	3	EX3	C4	?	Y	-	-	UNDETERMINED	-	-	-	-
2015-07-26	7	3	CONT3	D4	7	-	-	-	Y	-	-	-	-			2015-07-26	7	3	EX3	D4	8	-	-	-	Y	-	-	-	-
2015-07-26	7	3	CONT3	E4	7	-	-	-	Y	-	-	-	-			2015-07-26	7	3	EX3	E4	8	-	-	-	Y	-	-	-	-
2015-07-26	7	3	CONT3	F4	7	-	-	-	Y	-	-	-	-			2015-07-26	7	3	EX3	F4	7	-	-	-	Y	-	-	-	-
2015-07-26	7	3	CONT3	G4	7	-	-	-	Y	-	-	-	-			2015-07-26	7	3	EX3	G4	8	-	-	-	Y	-	-	-	-
2015-07-26	7	3	CONT3	H4	7	-	-	-	Y	-	-	-	-			2015-07-26	7	3	EX3	H4	8	-	-	-	Y	-	-	-	-
2015-07-26	7	3	CONT3	A5	7	-	-	-	Y	-	-	-	-			2015-07-26	7	3	EX3	A5	8	-	-	-	Y	-	-	-	-
2015-07-26	7	3	CONT3	B5	9	-	Y	-	Y	-	-	-	-			2015-07-26	7	3	EX3	B5	7	Y	-	-	BROKEN UP	-	-	-	-
2015-07-26	7	3	CONT3	C5	7	-	-	-	Y	-	-	-	-			2015-07-26	7	3	EX3	C5	?	Y	-	-	UNDETERMINED	-	-	-	-
2015-07-26	7	3	CONT3	D5	?	Y	-	-	UNDETERMINED	-	-	-	-			2015-07-26	7	3	EX3	D5	?	Y	-	-	UNDETERMINED	-	-	-	-
2015-07-26	7	3	CONT3	E5	7	-	-	-	Y	-	-	-	-			2015-07-26	7	3	EX3	E5	?	Y	-	-	UNDETERMINED	-	-	-	-
2015-07-26	7	3	CONT3	F5	?	Y	-	-	UNDETERMINED	-	-	-	-			2015-07-26	7	3	EX3	F5	8	-	-	-	Y	-	-	-	-
2015-07-26	7	3	CONT3	G5	8	-	-	-	Y	-	-	-	-			2015-07-26	7	3	EX3	G5	8	-	-	-	Y	-	-	-	-
2015-07-26	7	3	CONT3	H5	?	Y	-	-	UNDETERMINED	-	-	-	-			2015-07-26	7	3	EX3	H5	8	-	-	-	Y	-	-	-	-
2015-07-26	7	3	CONT3	A6	8	-	-	-	Y	-	-	-	-			2015-07-26	7	3	EX3	A6	?	Y	-	-	UNDETERMINED	-	-	-	-
2015-07-26	7	3	CONT3	B6	?	Y	-	-	UNDETERMINED	-	-	-	-			2015-07-26	7	3	EX3	B6	7	-	-	-	Y	-	-	-	-
2015-07-26	7	3	CONT3	C6	6	Y	-	-	BROKEN UP	-	-	-	-			2015-07-26	7	3	EX3	C6	8	-	-	-	Y	-	-	-	-
2015-07-26	7	3	CONT3	D6	?	Y	-	-	UNDETERMINED	-	-	-	-			2015-07-26	7	3	EX3	D6	8	-	-	-	Y	-	-	-	-
2015-07-26	7	3	CONT3	E6	7	-	-	-	Y	-	-	-	-			2015-07-26	7	3	EX3	E6	8	-	-	-	Y	-	-	-	-
2015-07-26	7	3	CONT3	F6	9	-	Y	-	Y	-	-	-	-			2015-07-26	7	3	EX3	F6	?	Y	-	-	UNDETERMINED	-	-	-	-
2015-07-26	7	3	CONT3	G6	?	Y	-	-	UNDETERMINED	-	-	-	-			2015-07-26	7	3	EX3	G6	7	-	-	-	Y	-	-	-	-
2015-07-27	7	3	CONT3	H6	?	-	-	-	UNDETERMINED	-	-	-	-			2015-07-26	7	3	EX3	H6	MISSING	-	-	-	-	-	-	-	-
2015-07-27	7	4	CONT4	A1	9	-	Y	-	Y	-	-	-	-			2015-07-27	7	4	EX4	A1	?	Y	-	-	UNDETERMINED	-	-	-	-
2015-07-27	7	4	CONT4	B1	9	-	Y	-	Y	-	-	-	-			2015-07-27	7	4	EX4	B1	9	Y	-	-	BROKEN UP	-	-	-	-
2015-07-27	7	4	CONT4	C1	ZOEA	-	Y	Y	Y	Y	Y	Y	Y			2015-07-27	7	4	EX4	C1	?	Y	-	-	UNDETERMINED	-	-	-	-
2015-07-27	7	4	CONT4	D1	9	-	Y	-	Y	-	-	-	-			2015-07-27	7	4	EX4	D1	9	-	Y	-	Y	-	-	-	-
2015-07-27	7	4	CONT4	E1	?	Y	-	-	UNDETERMINED	-	-	-	-			2015-07-27	7	4	EX4	E1	9	-	Y	-	Y	-	-	-	-
2015-07-27	7	4	CONT4	F1	?	Y	-	-	UNDETERMINED	-	-	-	-			2015-07-27	7	4	EX4	F1	?	Y	-	-	UNDETERMINED	-	-	-	-
2015-07-27	7	4	CONT4	G1	9	-	Y	-	Y	-	-	-	-			2015-07-27	7	4	EX4	G1	9	-	Y	-	Y	-	-	-	-
2015-07-27	7	4	CONT4	H1	?	Y	-	-	UNDETERMINED	-	-	-	-			2015-07-27	7	4	EX4	H1	9	-	Y	-	Y	-	-	-	-
2015-07-27	7	4	CONT4	A2	?	Y	-	-	UNDETERMINED	-	-	-	-			2015-07-27	7	4	EX4	A2	9	-	Y	-	Y	-	-	-	-
2015-07-27	7	4	CONT4	B2	?	Y	-	-	UNDETERMINED	-	-	-	-			2015-07-27	7	4	EX4	B2	?	Y	-	-	UNDETERMINED	-	-	-	-
2015-07-27	7	4	CONT4	C2	ZOEA	-	Y	Y	Y	Y	Y	Y	Y			2015-07-27	7	4	EX4	C2	9	-	Y	-	Y	-	-	-	-
2015-07-27	7	4	CONT4	D2	?	Y	-	-	UNDETERMINED	-	-	-	-			2015-07-27	7	4	EX4	D2	?	Y	-	-	UNDETERMINED	-	-	-	-
2015-07-27	7	4	CONT4	E2	6	Y	-	-	BROKEN UP	-	-	-	-			2015-07-27	7	4	EX4	E2	9	-	Y	-	Y	-	-	-	-
2015-07-27	7	4	CONT4	F2	9	-	Y	-	Y	-	-	-	-			2015-07-27	7	4	EX4	F2	9	Y	-	-	BROKEN UP	-	-	-	-
2015-07-27	7	4	CONT4	G2	6	Y	-	-	BROKEN UP	-	-	-	-			2015-07-27	7	4	EX4	G2	9	-	Y	-	Y	-	-	-	-
2015-07-27	7	4	CONT4	H2	?	Y	-	-	UNDETERMINED	-	-	-	-			2015-07-27	7	4	EX4	H2	?	Y	-	-	UNDETERMINED	-	-	-	-
2015-07-27	7	4	CONT4	A3	?	Y	-	-	UNDETERMINED	-	-	-	-			2015-07-27	7	4	EX4	A3	?	Y	-	-	UNDETERMINED	-	-	-	-
2015-07-27	7	4	CONT4	B3	9	-	Y	-	Y	-	-	-	-			2015-07-27	7	4	EX4	B3	9	Y	-	-	BROKEN UP	-	-	-	-
2015-07-27	7	4	CONT4	C3	8	-	-	-	Y	-	-	-	-			2015-07-27	7	4	EX4	C3	?	Y	-	-	UNDETERMINED	-	-	-	-
2015-07-27	7	4	CONT4	D3	9	-	Y	-	Y	-	-	-	-			2015-07-27	7	4	EX4	D3	9	-	Y	-	Y	-	-	-	-
2015-07-27	7	4	CONT4	E3	5	Y	-	-	NOT PRESENT	-	-	-	-			2015-07-27	7	4	EX4	E3	8	-	-	-	Y	-	-	-	-
2015-07-27	7	4	CONT4	F3	9	-	Y	-	Y	-	-	-	-			2015-07-27	7	4	EX4	F3	9	Y	-	-	BROKEN UP	-	-	-	-
2015-07-27	7	4	CONT4	G3	?	Y	-	-	UNDETERMINED	-	-	-	-			2015-07-27	7	4	EX4	G3	?	Y	-	-	UNDETERMINED	-	-	-	-
2015-07-27	7	4	CONT4	H3	9	-	Y	-	Y	-	-	-	-			2015-07-27	7	4	EX4	H3	?	Y	-	-	UNDETERMINED	-	-	-	-
2015-07-27	7	4	CONT4	A4	9	Y	-	-	BROKEN UP	-	-	-	-			2015-07-27	7	4	EX4	A4	8	-	-	-	Y	-	-	-	-
2015-07-27	7	4	CONT4	B4	7	-	-	-	Y	-	-	-	-			2015-07-27	7	4	EX4	B4	?	Y	-	-	UNDETERMINED	-	-	-	-
2015-07-27	7	4	CONT4	C4	9	-	Y	-	Y	-	-	-	-			2015-07-27	7	4	EX4	C4	?	Y	-	-	UNDETERMINED	-	-	-	-
2015-07-27	7	4	CONT4	D4	9	-	Y	-	Y	-	-	-	-			2015-07-27	7	4	EX4	D4	9	-	Y	-	Y	-	-	-	-
2015-07-27	7	4	CONT4	E4	?	Y	-	-	UNDETERMINED	-	-	-	-			2015-07-27	7	4	EX4	E4	6	Y	-	-	BROKEN UP	-	-	-	-
2015-07-27	7	4	CONT4	F4	9	-	Y	-	Y	-	-	-	-			2015-07-27	7	4	EX4	F4	9	-	Y	-	Y	-	-	-	-
2015-07-27	7	4	CONT4	G4	9	-	Y	-	Y	-	-	-	-			2015-07-27	7	4	EX4	G4	9	-	Y	-	Y	-	-	-	-
2015-07-27	7	4	CONT4	H4	9	-	Y	-	Y	-	-	-	-			2015-07-27	7	4	EX4	H4	9	-	Y	-	Y	-	-	-	-
2015-07-27	7	4	CONT4	A5	6	Y	-	-	BROKEN UP	-	-	-	-			2015-07-27	7	4	EX4	A5	9	-	Y	-	Y	-	-	-	-
2015-07-27	7	4	CONT4	B5	9	-	Y	-	Y	-	-	-	-			2015-07-27	7	4	EX4	B5	9	-	Y	-	Y	-	-	-	-
2015-07-27	7	4	CONT4	C5	?	Y	-	-	UNDETERMINED	-	-	-	-			2015-07-27	7	4	EX4	C5	?	Y	-	-	UNDETERMINED	-	-	-	-
2015-07-27	7	4	CONT4	D5	9	-	Y	-	Y	-	-	-	-			2015-07-27	7	4	EX4	D5	?	Y	-	-	UNDETERMINED	-	-	-	-
2015-07-27	7	4	CONT4	E5	?	Y	-	-	UNDETERMINED	-	-	-	-			2015-07-27	7	4	EX4	E5	?	Y	-	-	UNDETERMINED	-	-	-	-
2015-07-27	7	4	CONT4	F5	?	Y	-	-	UNDETERMINED	-	-	-	-			2015-07-27	7	4	EX4	F5	9	-	Y	-	Y	-	-	-	-
2015-07-27	7	4	CONT4	G5	9	-	Y	-	Y	-	-	-	-			2015-07-27	7	4	EX4	G5	9	-	Y	-	Y	-	-	-	-
2015-07-27	7	4	CONT4	H5	?	Y	-	-	UNDETERMINED	-	-	-	-			2015-07-27	7	4	EX4	H5	9	-	Y	-	Y	-	-	-	-
2015-07-27	7	4	CONT4	A6	?	Y	-	-	UNDETERMINED	-	-	-	-			2015-07-27	7	4	EX4	A6	?	Y	-	-	UNDETERMINED	-	-	-	-
2015-07-27	7	4	CONT4	B6	?	Y	-	-	UNDETERMINED	-	-	-	-			2015-07-27	7	4	EX4	B6	?	Y	-	-	UNDETERMINED	-	-	-	-
2015-07-27	7	4	CONT4	C6	?	Y	-	-	UNDETERMINED	-	-	-	-			2015-07-27	7	4	EX4	C6	?	Y	-	-	UNDETERMINED	-	-	-	-
2015-07-27	7	4	CONT4	D6	9	-	Y	-	Y	-	-	-	-			2015-07-27	7	4	EX4	D6	?	Y	-	-	UNDETERMINED	-	-	-	-
2015-07-27	7	4	CONT4	E6	9	-	Y	-	Y	-	-	-	-			2015-07-27	7	4	EX4	E6	?	Y	-	-	UNDETERMINED	-	-	-	-
2015-07-27	7	4	CONT4	F6	9	-	Y	-	Y	-	-	-	-			2015-07-27	7	4	EX4	F6	6	Y	-	-	BROKEN UP	-	-	-	-
2015-07-27	7	4	CONT4	G6	?	Y	-	-	UNDETERMINED	-	-	-	-			2015-07-27	7	4	EX4	G6	?	Y	-	-	UNDETERMINED	-	-	-	-
2015-07-28	7	4	CONT4	H6	9	-	Y	-	Y	-	-	-	-			2015-07-27	7	4	EX4	H6	9	-	Y	-	Y	-	-	-	-
2015-07-28	7	5	CONT5	A1	?	Y	-	-	UNDETERMINED	-	-	-	-			2015-07-28	7	5	EX5	A1	9	Y	-	-	BROKEN UP	-	-	-	-
2015-07-28	7	5	CONT5	B1	9	-	Y	-	Y	-	-	-	-			2015-07-28	7	5	EX5	B1	9	Y	-	-	BROKEN UP	-	-	-	-
2015-07-28	7	5	CONT5	C1	?	Y	-	-	UNDETERMINED	-	-	-	-			2015-07-28	7	5	EX5	C1	9	Y	-	-	ROUND	-	-	-	-
2015-07-28	7	5	CONT5	D1	?	Y	-	-	UNDETERMINED	-	-	-	-			2015-07-28	7	5	EX5	D1	?	Y	-	-	UNDETERMINED	-	-	-	-
2015-07-28	7	5	CONT5	E1	?	Y	-	-	UNDETERMINED	-	-	-	-			2015-07-28	7	5	EX5	E1	?	Y	-	-	UNDETERMINED	-	-	-	-
2015-07-28	7	5	CONT5	F1	9	-	Y	-	Y	-	-	-	-			2015-07-28	7	5	EX5	F1	?	Y	-	-	UNDETERMINED	-	-	-	-
2015-07-28	7	5	CONT5	G1	?	Y	-	-	UNDETERMINED	-	-	-	-			2015-07-28	7	5	EX5	G1	6	Y	-	-	BROKEN UP	-	-	-	-
2015-07-28	7	5	CONT5	H1	9	-	Y	-	Y	-	-	-	-			2015-07-28	7	5	EX5	H1	6	Y	-	-	BROKEN UP	-	-	-	-
2015-07-28	7	5	CONT5	A2	?	Y	-	-	UNDETERMINED	-	-	-	-			2015-07-28	7	5	EX5	A2	?	Y	-	-	UNDETERMINED	-	-	-	-
2015-07-28	7	5	CONT5	B2	?	Y	-	-	UNDETERMINED	-	-	-	-			2015-07-28	7	5	EX5	B2	7	Y	-	-	BROKEN UP	-	-	-	-
2015-07-28	7	5	CONT5	C2	?	Y	-	-	UNDETERMINED	-	-	-	-			2015-07-28	7	5	EX5	C2	8	-	-	-	Y	-	-	-	-
2015-07-28	7	5	CONT5	D2	ZOEA	-	Y	Y	Y	Y	Y	Y	Y			2015-07-28	7	5	EX5	D2	?	Y	-	-	UNDETERMINED	-	-	-	-
2015-07-28	7	5	CONT5	E2	?	Y	-	-	UNDETERMINED	-	-	-	-			2015-07-28	7	5	EX5	E2	MISSING	-	-	-	-	-	-	-	-
2015-07-28	7	5	CONT5	F2	9	-	Y	-	Y	-	-	-	-			2015-07-28	7	5	EX5	F2	?	Y	-	-	UNDETERMINED	-	-	-	-
2015-07-28	7	5	CONT5	G2	9	-	Y	-	Y	-	-	-	-			2015-07-28	7	5	EX5	G2	9	Y	-	-	BROKEN UP	-	-	-	-
2015-07-28	7	5	CONT5	H2	ZOEA	-	Y	Y	Y	Y	Y	Y	Y			2015-07-28	7	5	EX5	H2	MISSING	-	-	-	-	-	-	-	-
2015-07-28	7	5	CONT5	A3	?	Y	-	-	-	-	-	-	-			2015-07-28	7	5	EX5	A3	?	Y	-	-	UNDETERMINED	-	-	-	-
2015-07-28	7	5	CONT5	B3	?	Y	-	-	UNDETERMINED	-	-	-	-			2015-07-28	7	5	EX5	B3	?	Y	-	-	UNDETERMINED	-	-	-	-
2015-07-28	7	5	CONT5	C3	9	-	Y	-	Y	-	-	-	-			2015-07-28	7	5	EX5	C3	?	Y	-	-	UNDETERMINED	-	-	-	-
2015-07-28	7	5	CONT5	D3	9	-	Y	-	Y	-	-	-	-			2015-07-28	7	5	EX5	D3	?	Y	-	-	UNDETERMINED	-	-	-	-
2015-07-28	7	5	CONT5	E3	?	Y	-	-	UNDETERMINED	-	-	-	-			2015-07-28	7	5	EX5	E3	7	Y	-	-	BROKEN UP	-	-	-	-
2015-07-28	7	5	CONT5	F3	9	-	Y	-	Y	-	-	-	-			2015-07-28	7	5	EX5	F3	?	Y	-	-	UNDETERMINED	-	-	-	-
2015-07-28	7	5	CONT5	G3	?	Y	-	-	UNDETERMINED	-	-	-	-			2015-07-28	7	5	EX5	G3	9	Y	-	-	VERY LARGE BROKEN UP	-	-	-	-
2015-07-28	7	5	CONT5	H3	9	-	Y	-	Y	-	-	-	-			2015-07-28	7	5	EX5	H3	PREZOEA	-	Y	N	Y	N	Y	IMPAIRED	N
2015-07-28	7	5	CONT5	A4	ZOEA	-	Y	Y	Y	Y	Y	Y	Y			2015-07-28	7	5	EX5	A4	?	Y	-	-	UNDETERMINED	-	-	-	-
2015-07-28	7	5	CONT5	B4	?	Y	-	-	UNDETERMINED	-	-	-	-			2015-07-28	7	5	EX5	B4	?	Y	-	-	UNDETERMINED	-	-	-	-
2015-07-28	7	5	CONT5	C4	ZOEA	-	Y	Y	Y	Y	Y	Y	Y			2015-07-28	7	5	EX5	C4	?	Y	-	-	UNDETERMINED	-	-	-	-
2015-07-28	7	5	CONT5	D4	ZOEA	-	Y	Y	Y	Y	Y	Y	Y			2015-07-28	7	5	EX5	D4	PREZOEA	-	Y	N	Y	N	Y	IMPAIRED	N
2015-07-28	7	5	CONT5	E4	ZOEA	-	Y	Y	Y	Y	Y	Y	Y			2015-07-28	7	5	EX5	E4	?	Y	-	-	UNDETERMINED	-	-	-	-
2015-07-28	7	5	CONT5	F4	ZOEA	-	Y	Y	Y	Y	Y	Y	Y			2015-07-28	7	5	EX5	F4	?	Y	-	-	UNDETERMINED	-	-	-	-
2015-07-28	7	5	CONT5	G4	ZOEA	-	Y	Y	Y	Y	Y	Y	Y			2015-07-28	7	5	EX5	G4	?	Y	-	-	UNDETERMINED	-	-	-	-
2015-07-28	7	5	CONT5	H4	?	Y	-	-	UNDETERMINED	-	-	-	-			2015-07-28	7	5	EX5	H4	9	-	Y	-	Y	-	-	-	-
2015-07-28	7	5	CONT5	A5	?	Y	-	-	UNDETERMINED	-	-	-	-			2015-07-28	7	5	EX5	A5	PREZOEA	-	Y	N	Y	N	Y	IMPAIRED	N
2015-07-28	7	5	CONT5	B5	6	Y	-	-	UNDETERMINED	-	-	-	-			2015-07-28	7	5	EX5	B5	?	Y	-	-	UNDETERMINED	-	-	-	-
2015-07-28	7	5	CONT5	C5	?	Y	-	-	UNDETERMINED	-	-	-	-			2015-07-28	7	5	EX5	C5	?	Y	-	-	UNDETERMINED	-	-	-	-
2015-07-28	7	5	CONT5	D5	ZOEA	-	-	-	UNDETERMINED	-	-	-	-			2015-07-28	7	5	EX5	D5	9	-	Y	-	Y	-	-	-	-
2015-07-28	7	5	CONT5	E5	?	Y	-	-	UNDETERMINED	-	-	-	-			2015-07-28	7	5	EX5	E5	?	Y	-	-	UNDETERMINED	-	-	-	-
2015-07-28	7	5	CONT5	F5	ZOEA	-	-	-	UNDETERMINED	-	-	-	-			2015-07-28	7	5	EX5	F5	9	-	Y	-	Y	-	-	-	-
2015-07-28	7	5	CONT5	G5	ZOEA	-	N	Y	Y	Y	Y	-	Y			2015-07-28	7	5	EX5	G5	9	-	Y	-	Y	-	-	-	-
2015-07-28	7	5	CONT5	H5	9	Y	-	-	Y	-	-	-	-			2015-07-28	7	5	EX5	H5	?	Y	-	-	UNDETERMINED	-	-	-	-
2015-07-28	7	5	CONT5	A6	9	Y	-	-	BROKEN UP	-	-	-	-			2015-07-28	7	5	EX5	A6	9	-	Y	-	Y	-	-	-	-
2015-07-28	7	5	CONT5	B6	ZOEA	-	Y	Y	Y	Y	Y	Y	Y			2015-07-28	7	5	EX5	B6	?	Y	-	-	UNDETERMINED	-	-	-	-
2015-07-28	7	5	CONT5	C6	ZOEA	-	Y	Y	Y	Y	Y	Y	Y			2015-07-28	7	5	EX5	C6	?	Y	-	-	UNDETERMINED	-	-	-	-
2015-07-28	7	5	CONT5	D6	ZOEA	-	Y	Y	Y	Y	Y	Y	Y			2015-07-28	7	5	EX5	D6	?	Y	-	-	UNDETERMINED	-	-	-	-
2015-07-28	7	5	CONT5	E6	?	Y	-	-	UNDETERMINED	-	-	-	-			2015-07-28	7	5	EX5	E6	?	Y	-	-	UNDETERMINED	-	-	-	-
2015-07-28	7	5	CONT5	F6	?	Y	-	-	UNDETERMINED	-	-	-	-			2015-07-28	7	5	EX5	F6	9	-	Y	-	Y	-	-	-	-
2015-07-28	7	5	CONT5	G6	ZOEA	-	Y	Y	Y	Y	Y	Y	Y			2015-07-28	7	5	EX5	G6	6	Y	-	-	BROKEN UP	-	-	-	-
2015-07-29	7	5	CONT5	H6	ZOEA	-	Y	Y	Y	Y	Y	Y	Y			2015-07-28	7	5	EX5	H6	9	Y	-	-	ROUND	-	-	-	-
2015-07-29	7	6	CONT 6	A1	ZOEA	-	Y	Y	Y	Y	Y	Y	Y			2015-07-29	7	6	EX6	A1	?	Y	-	-	UNDETERMINED	-	-	-	-
2015-07-29	7	6	CONT6	B1	?	Y	-	-	UNDETERMINED	-	-	-	-			2015-07-29	7	6	EX6	B1	?	Y	-	-	UNDETERMINED	-	-	-	-
2015-07-29	7	6	CONT 6	C1	6	Y	-	-	BROKEN UP	-	-	-	-			2015-07-29	7	6	EX6	C1	ZOEA	-	Y	Y	Y	Y	Y	Y	Y
2015-07-29	7	6	CONT 6	D1	ZOEA	-	Y	Y	Y	Y	Y	Y	Y			2015-07-29	7	6	EX6	D1	?	Y	-	-	UNDETERMINED	-	-	-	-
2015-07-29	7	6	CONT 6	E1	?	Y	-	-	UNDETERMINED	-	-	-	-			2015-07-29	7	6	EX6	E1	7	Y	-	-	BROKEN UP	-	-	-	-
2015-07-29	7	6	CONT 6	F1	?	Y	-	-	UNDETERMINED	-	-	-	-			2015-07-29	7	6	EX6	F1	?	Y	-	-	UNDETERMINED	-	-	-	-
2015-07-29	7	6	CONT 6	G1	ZOEA	-	Y	Y	Y	Y	Y	Y	Y			2015-07-29	7	6	EX6	G1	?	Y	-	-	UNDETERMINED	-	-	-	-
2015-07-29	7	6	CONT 6	H1	?	Y	-	-	UNDETERMINED	-	-	-	-			2015-07-29	7	6	EX6	H1	?	Y	-	-	UNDETERMINED	-	-	-	-
2015-07-29	7	6	CONT 6	A2	?	Y	-	-	UNDETERMINED	-	-	-	-			2015-07-29	7	6	EX6	A2	?	Y	-	-	UNDETERMINED	-	-	-	-
2015-07-29	7	6	CONT 6	B2	?	Y	-	-	UNDETERMINED	-	-	-	-			2015-07-29	7	6	EX6	B2	?	Y	-	-	UNDETERMINED	-	-	-	-
2015-07-29	7	6	CONT 6	C2	?	Y	-	-	UNDETERMINED	-	-	-	-			2015-07-29	7	6	EX6	C2	7	Y	-	-	BROKEN UP	-	-	-	-
2015-07-29	7	6	CONT 6	D2	?	Y	-	-	UNDETERMINED	-	-	-	-			2015-07-29	7	6	EX6	D2	?	Y	-	-	UNDETERMINED	-	-	-	-
2015-07-29	7	6	CONT 6	E2	?	Y	-	-	UNDETERMINED	-	-	-	-			2015-07-29	7	6	EX6	E2	?	Y	-	-	UNDETERMINED	-	-	-	-
2015-07-29	7	6	CONT 6	F2	?	Y	-	-	UNDETERMINED	-	-	-	-			2015-07-29	7	6	EX6	F2	ZOEA	-	Y	Y	Y	Y	Y	Y	-
2015-07-29	7	6	CONT 6	G2	?	Y	-	-	UNDETERMINED	-	-	-	-			2015-07-29	7	6	EX6	G2	?	Y	-	-	UNDETERMINED	-	-	-	Y
2015-07-29	7	6	CONT 6	H2	9	Y	-	-	BROKEN UP	-	-	-	-			2015-07-29	7	6	EX6	H2	9	-	Y	-	Y	-	-	-	-
2015-07-29	7	6	CONT 6	A3	?	Y	-	-	UNDETERMINED	-	-	-	-			2015-07-29	7	6	EX6	A3	?	Y	-	-	UNDETERMINED	-	-	-	-
2015-07-29	7	6	CONT 6	B3	9	-	Y	-	Y	-	-	-	-			2015-07-29	7	6	EX6	B3	?	Y	-	-	UNDETERMINED	-	-	-	-
2015-07-29	7	6	CONT 6	C3	ZOEA	-	Y	Y	Y	Y	Y	Y	Y			2015-07-29	7	6	EX6	C3	PREZOEA	-	Y	N	Y	N	Y	N	-
2015-07-29	7	6	CONT 6	D3	?	Y	-	-	UNDETERMINED	-	-	-	-			2015-07-29	7	6	EX6	D3	?	Y	-	-	UNDETERMINED	-	-	-	-
2015-07-29	7	6	CONT 6	E3	ZOEA	-	Y	Y	Y	Y	Y	Y	Y			2015-07-29	7	6	EX6	E3	PREZOEA	-	Y	N	Y	N	Y	IMPAIRED	N
2015-07-29	7	6	CONT 6	F3	?	Y	-	-	UNDETERMINED	-	-	-	-			2015-07-29	7	6	EX6	F3	?	Y	-	-	UNDETERMINED	-	-	-
2015-07-29	7	6	CONT 6	G3	?	Y	-	-	UNDETERMINED	-	-	-	-			2015-07-29	7	6	EX6	G3	?	Y	-	-	UNDETERMINED	-	-	-	-
2015-07-29	7	6	CONT 6	H3	?	Y	-	-	UNDETERMINED	-	-	-	-			2015-07-29	7	6	EX6	H3	?	Y	-	-	UNDETERMINED	-	-	-	-
2015-07-29	7	6	CONT 6	A4	PREZOEA	-	Y	N	Y	N	Y	IMPAIRED	N			2015-07-29	7	6	EX6	A4	9	Y	-	-	VERY LARGE BROKEN UP	-	-	-	-
2015-07-29	7	6	CONT 6	B4	9	-	Y	-	Y	-	-	-	-			2015-07-29	7	6	EX6	B4	?	Y	-	-	UNDETERMINED	-	-	-	-
2015-07-29	7	6	CONT 6	C4	?	Y	-	-	UNDETERMINED	-	-	-	-			2015-07-29	7	6	EX6	C4	9	Y	-	-	VERY LARGE BROKEN UP	-	-	-	-
2015-07-29	7	6	CONT 6	D4	?	Y	-	-	UNDETERMINED	-	-	-	-			2015-07-29	7	6	EX6	D4	PREZOEA	-	Y	N	Y	N	Y	IMPAIRED	N
2015-07-29	7	6	CONT 6	E4	9	-	Y	-	Y	-	-	-	-			2015-07-29	7	6	EX6	E4	ZOEA	-	Y	Y	Y	Y	Y	Y	Y
2015-07-29	7	6	CONT 6	F4	ZOEA	-	Y	Y	Y	Y	Y	Y	Y			2015-07-29	7	6	EX6	F4	?	Y	-	-	UNDETERMINED	-	-	-	Y
2015-07-29	7	6	CONT 6	G4	?	Y	-	-	UNDETERMINED	-	-	-	-			2015-07-29	7	6	EX6	G4	?	Y	-	-	UNDETERMINED	-	-	-	-
2015-07-29	7	6	CONT 6	H4	?	Y	-	-	UNDETERMINED	-	-	-	-			2015-07-29	7	6	EX6	H4	?	Y	-	-	UNDETERMINED	-	-	-	-
2015-07-29	7	6	CONT 6	A5	?	Y	-	-	UNDETERMINED	-	-	-	-			2015-07-29	7	6	EX6	A5	PREZOEA	-	Y	N	Y	N	Y	IMPAIRED	-
2015-07-29	7	6	CONT 6	B5	?	Y	-	-	UNDETERMINED	-	-	-	-			2015-07-29	7	6	EX6	B5	PREZOEA	-	Y	N	Y	N	Y	IMPAIRED	N
2015-07-29	7	6	CONT 6	C5	PREZOEA	-	Y	N	Y	N	Y	IMPAIRED	N			2015-07-29	7	6	EX6	C5	?	Y	-	-	UNDETERMINED	-	-	-	-
2015-07-29	7	6	CONT 6	D5	?	Y	-	-	UNDETERMINED	-	-	-	-			2015-07-29	7	6	EX6	D5	PREZOEA	-	Y	N	Y	N	Y	IMPAIRED	N
2015-07-29	7	6	CONT 6	E5	?	Y	-	-	UNDETERMINED	-	-	-	-			2015-07-29	7	6	EX6	E5	?	Y	-	-	UNDETERMINED	-	-	-	-
2015-07-29	7	6	CONT 6	F5	9	Y	-	-	BROKEN UP	-	-	-	-			2015-07-29	7	6	EX6	F5	?	Y	-	-	UNDETERMINED	-	-	-	-
2015-07-29	7	6	CONT 6	G5	ZOEA	-	Y	Y	Y	Y	Y	Y	Y			2015-07-29	7	6	EX6	G5	PREZOEA	-	Y	N	Y	N	Y	IMPAIRED	N
2015-07-29	7	6	CONT 6	H5	?	Y	-	-	UNDETERMINED	-	-	-	-			2015-07-29	7	6	EX6	H5	?	Y	-	-	UNDETERMINED	-	-	-	-
2015-07-29	7	6	CONT 6	A6	?	Y	-	-	UNDETERMINED	-	-	-	-			2015-07-29	7	6	EX6	A6	ZOEA	-	Y	Y	Y	Y	Y	Y	Y
2015-07-29	7	6	CONT 6	B6	?	Y	-	-	UNDETERMINED	-	-	-	-			2015-07-29	7	6	EX6	B6	?	Y	-	-	UNDETERMINED	-	-	-	-
2015-07-29	7	6	CONT 6	C6	ZOEA	-	Y	Y	Y	Y	Y	Y	Y			2015-07-29	7	6	EX6	C6	PREZOEA	-	Y	N	Y	N	Y	IMPAIRED	N
2015-07-29	7	6	CONT 6	D6	?	Y	-	-	UNDETERMINED	-	-	-	-			2015-07-29	7	6	EX6	D6	9	-	Y	-	Y	-	-	-	-
2015-07-29	7	6	CONT 6	E6	ZOEA	-	Y	-	Y	Y	Y	Y	Y			2015-07-29	7	6	EX6	E6	?	Y	-	-	UNDETERMINED	-	-	-	-
2015-07-29	7	6	CONT 6	F6	?	Y	-	-	UNDETERMINED	-	-	-	-			2015-07-29	7	6	EX6	F6	?	Y	-	-	UNDETERMINED	-	-	-	-
2015-07-29	7	6	CONT 6	G6	?	Y	-	-	UNDETERMINED	-	-	-	-			2015-07-29	7	6	EX6	G6	?	Y	-	-	UNDETERMINED	-	-	-	-
2015-07-29	7	6	CONT 6	H6	?	Y	-	-	UNDETERMINED	-	-	-	-			2015-07-29	7	6	EX6	H6	?	Y	-	-	UNDETERMINED	-	-	-	-

## Sheet: Metadata
COLUMN
Date	The date that the plate was removed from the incubator and the embryonated eggs within that plate were examined
Replicate #	Numbered 1-7 indicating from which female the eggs were taken
Day	The amount of time in days since the start of the experiment
Plate ID	Plates were labeled Cont for control and Ex for experimental and numbered corresponding to the Day.
Stage	The stage of the embryo was determined by the morphological features described by DeVries (1983)
Cloudy/Dark	Living embryos were observed to have clear eggs with yellow yolk. Embryos in cloudy eggs with dark yolk that ranged in color from dark yellow to orange were considered deceased. If the column is left blank the egg was observed to be clear with a yellow yolk.
Heart Beat	Heartbeat was visually assessed and generally occurred after stage 9
Dorsal Spine	Dorsal spine morphology was evaluated in hatched larvae. In zoea the dorsal spine is typically long and erect with backward arch. In prezoea the dorsal spine was either not visible due to persistent invagination or it was visibly shorter than the dorsal spine of a typical zoea. This characteristic is noted as SHORT. Occasionally these short dorsal spines would be arched forward. This characterist…
Eyes (Full & Bilaterally symmetrical)	The eyes of embryos below stage 6 are classified as NOT PRESENT indicating that they had not yet reached this developmental milestone. The eyes of embryos at stage 6 or later were evaluated on the basis of being bilaterally symmetrical and fully pigmented. If eyes met this criteria they were classified as Y for yes. If they did not meet the criteria they were classified as either BROKEN UP indica…
Rostrum	The presence or absence or a rostrum was visually assessed in hatched larvae and noted as Y for present and N for absent.
Telson	The telson was visually assessed in hatched larvae for abnormalities and noted Y for normal and N for abnormal
Swimming Ability	Swimming ability was assessed in hatched larvae and noted as NORMAL if the larvae was able to swim in the typical, rapid fashion of a zoea or IMPAIRED if the swimming was abnormal.
Lateral Spines	Lateral spines were visually assessed in hatched larvae for abnormalities and noted as Y for present and normal or N for absent with additional notes documenting abnormalities.
Kelsie L. Kelly1, Caz M. Taylor2
1 Brooklyn Law School, 250 Joralemon Street, New Orleans, Louisiana, 70118, U.S.A.
2 Department of Ecology & Evolutionary Biology, Tulane University, 6823 St Charles Ave, New Orleans, Louisiana, 70118, U.S.A.
Corresponding Author:
Kelsie Kelly1
205 State Street, Brooklyn, New York, 11201, U.S.A.
Email address: Kkelly11@tulane.edu
